# Supplementary material for: A two step protocol for the synthesis of highly substituted benzobicyclo[2.2.2]octadienone derivatives from 2-methoxyphenols
Source: Royal Society of Chemistry journal article supplement (doi:10.1039/c4ra14219e), 2014-12-19
Supplement: c4ra14219e1.pdf [file c4ra14219e1.pdf]

## **Supporting Information**

**for**

### **Facile Imidazole Mediated Microwave-Assisted Aromatization Reaction: Synthesis of Benzobicyclo[2.2.2]octadienone Derivatives**

**Santhosh Kumar Chittimalla,\* Chennakesavulu Bandi and Sireesha Putturu**

AMRI Singapore Research Centre, 61 Science Park Road, #05-01, Science Park II, Singapore 117525, Singapore. Fax: +65 - 6398 5511. E-mail:  
santhosh.chittimalla@amriglobal.com; chemcsk@gmail.com

**General procedure for the preparation of MOB dimers 3a-3k:** To a solution of 2-methoxyphenol (**1**, 1.0 mmol) in methanol (4 mL) was added DAIB (1.3 mmol) and the resulting mixture was stirred for 1 h – 8 h at room temperature. The reaction mixture was concentrated and the residue was purified by column chromatography on silica gel by using a mixture of ethyl acetate and hexanes as eluent to obtain corresponding MOB dimers **3**.

Dimers **3a**, **3c**, **3d**:  $^1\text{H}$  and  $^{13}\text{C}$  NMR spectral data were identical to those reported in literature. Lai, C.-H.; Shen, Y.-L.; Wang, M.-N.; Rao, N. S. K.; Liao, C.-C. *J. Org. Chem.* **2002**, *67*, 6493-6502.

Dimer **3b**:  $^1\text{H}$  and  $^{13}\text{C}$  NMR spectral data were identical to those reported in literature. Deffieux, D.; Fabre, I.; Titz, A.; Leger, J.-M.; Quideau, S. *J. Org. Chem.* **2004**, *69* 8731-8738.

Dimer **3g**:  $^1\text{H}$  and  $^{13}\text{C}$  NMR spectral data were identical to those reported in literature. Nishiyama, A.; Eto, H.; Terada, Y.; Iguchi, M.; Yamamura, S. *Chem. Pharm. Bull.* **1983**, *31*, 2834-2844.

**3e**:  $^1\text{H}$  NMR (400 MHz,  $\text{CDCl}_3$ )  $\delta$  6.21–6.12 (m, 2H), 5.53 (d,  $J = 8.0$  Hz, 1H), 3.43 (s, 3H), 3.36 (s, 3H), 3.23–3.18 (m, 1H), 3.17 (s, 3H), 3.13–3.06 (m, 1H), 3.04–3.02 (m, 1H), 3.02 (s, 3H), 2.31–2.15 (m, 2H), 1.94–1.83 (m, 1H), 1.74–1.63 (m, 1H), 1.08–0.98 (m, 6H).  $^{13}\text{C}$  NMR (100 MHz,  $\text{CDCl}_3$ )  $\delta$  203.8 (C), 194.7 (C), 142.7 (C), 137.5 (CH), 133.0 (CH), 131.3 (CH), 98.8 (C), 94.9 (C), 58.0 (C), 50.4 ( $\text{CH}_3$ ), 50.1 ( $\text{CH}_3$ ), 49.6 ( $\text{CH}_3$ ), 48.8 ( $\text{CH}_3$ ), 40.4 (CH), 39.7 (CH), 39.4 (CH), 23.0 ( $\text{CH}_2$ ), 22.3 ( $\text{CH}_2$ ), 12.7 ( $\text{CH}_3$ ), 9.1 ( $\text{CH}_3$ ). MS (ESI):  $m/z$  found  $\text{C}_{20}\text{H}_{29}\text{O}_6$  [ $\text{M} + \text{H}$ ] $^+$  365.

**3f**:  $^1\text{H}$  NMR (400 MHz,  $\text{CDCl}_3$ )  $\delta$  5.82 (s, 1H), 5.74 (app dd,  $J = 6.4$ , 1.6 Hz, 1H), 3.36 (s, 3H), 3.33 (s, 3H), 3.18 (s, 3H), 3.17–3.14 (m, 1H), 3.11–3.05 (m, 2H), 2.99 (dd,  $J = 6.8$ , 1.6 Hz, 1H), 2.97 (s, 3H), 2.29–2.07 (m, 2H), 1.88–1.68 (m, 2H), 1.04 (t,  $J = 7.2$  Hz, 3H), 0.84 (t,  $J = 7.2$  Hz, 3H).  $^{13}\text{C}$  NMR (100 MHz,  $\text{CDCl}_3$ )  $\delta$  202.3 (C), 193.3 (C), 161.4 (C), 142.5 (C), 123.7 (CH), 123.0 (CH), 98.7 (C), 94.7 (C), 57.1 (CH), 50.4 ( $\text{CH}_3$ ), 49.8 ( $\text{CH}_3$ ), 49.4 ( $\text{CH}_3$ ), 48.8 ( $\text{CH}_3$ ), 41.7 (CH), 39.4 (CH), 38.5 (CH), 28.0 ( $\text{CH}_2$ ), 27.8 ( $\text{CH}_2$ ), 11.6 ( $\text{CH}_3$ ), 10.4 ( $\text{CH}_3$ ).

**3h**:  $^1\text{H}$  NMR (300 MHz,  $\text{CDCl}_3$ )  $\delta$  5.85 (d,  $J = 0.6$  Hz, 1H), 5.78 (dd,  $J = 6.9$ , 1.5 Hz, 1H), 3.40 (s, 3H), 3.34 (s, 3H), 3.21 (s, 3H), 3.23–3.18 (m, 1H), 3.16–3.09 (m, 2H), 3.01 (s, 3H), 3.03–2.98 (m, 1H), 2.24–2.05 (m, 2H), 1.83–1.76 (m, 2H), 1.62–1.18 (m, 4H), 0.92 (t,  $J = 7.2$  Hz, 3H), 0.79 (t,  $J = 7.2$  Hz, 3H).  $^{13}\text{C}$  NMR (75 MHz,  $\text{CDCl}_3$ )  $\delta$  202.6 (C), 193.3 (C), 160.1 (C), 141.2 (C), 125.1 (CH), 124.1 (CH), 98.8 (C), 94.9 (C), 77.2 (C), 56.9 (CH), 50.5 ( $\text{CH}_3$ ), 49.9 ( $\text{CH}_3$ ), 49.5 ( $\text{CH}_3$ ), 48.8 ( $\text{CH}_3$ ), 41.6 (CH), 39.6 (CH), 38.4 (CH), 37.2 ( $\text{CH}_2$ ), 36.9 ( $\text{CH}_2$ ), 20.9 ( $\text{CH}_2$ ), 19.5 ( $\text{CH}_2$ ), 13.4 ( $\text{CH}_3$ ), 13.3 ( $\text{CH}_3$ ).

**3i**:  $^1\text{H}$  NMR (400 MHz,  $\text{CDCl}_3$ )  $\delta$  7.35 (d,  $J = 4.0$  Hz, 1H), 6.18 (app t,  $J = 8.0$  Hz, 1H), 5.99 (d,  $J = 8.4$  Hz, 1H), 5.24 (s, 1H), 4.99 (s, 1H), 3.79–3.66 (m, 3H), 3.65–3.54 (m, 3H), 3.53–3.48 (m, 2H), 3.47–3.41 (m, 1H), 3.46 (s, 3H), 3.36 (s, 3H), 3.25 (d,  $J = 8.0$  Hz, 1H), 3.17 (s, 3H), 3.08 (s, 3H), 3.07–3.03 (m, 1H), 1.28 (s, 3H), 1.17 (s, 3H), 0.75 (s, 3H), 0.71 (s, 3H).  $^{13}\text{C}$  NMR (100 MHz,  $\text{CDCl}_3$ )  $\delta$  201.2 (C), 193.0 (C), 144.2 (CH), 136.9 (C), 130.3 (CH), 129.8 (CH), 99.5 (CH), 98.6 (C), 95.9 (CH), 94.9 (C), 78.3 ( $\text{CH}_2$ ), 77.59 ( $\text{CH}_2$ ), 77.56 ( $\text{CH}_2$ ), 77.5 ( $\text{CH}_2$ ), 60.7 (C), 50.8 ( $\text{CH}_3$ ), 50.0 ( $\text{CH}_3$ ), 49.2 ( $\text{CH}_3$ ), 48.7 ( $\text{CH}_3$ ), 39.2 (CH), 38.9 (CH), 38.3 (CH), 30.3 (C), 30.1 (C), 23.7 ( $\text{CH}_3$ ), 22.9 ( $\text{CH}_3$ ), 22.0 ( $\text{CH}_3$ ), 21.8 ( $\text{CH}_3$ ).

**3j:**  $^1\text{H}$  NMR (400 MHz,  $\text{CDCl}_3$ )  $\delta$  6.16 (t,  $J = 1.2$  Hz, 1H), 6.14 (br s, 1H), 5.02 (d,  $J = 1.2$  Hz, 1H), 4.67 (s, 1H), 3.70–3.61 (m, 3H), 3.60–3.55 (m, 1H), 3.54–3.49 (m, 1H), 3.48–3.44 (m, 2H), 3.43–3.37 (m, 1H), 3.40 (s, 3H), 3.36–3.28 (m, 2H), 3.35 (s, 3H), 3.21 (dd,  $J = 8.4, 1.6$  Hz, 1H), 3.18 (s, 3H), 3.08 (dd,  $J = 6.8, 1.6$  Hz, 1H), 3.02 (s, 3H), 1.14 (s, 3H), 1.10 (s, 3H), 0.73 (s, 3H), 0.66 (s, 3H).  $^{13}\text{C}$  NMR (100 MHz,  $\text{CDCl}_3$ )  $\delta$  202.1 (C), 194.1 (C), 153.7 (C), 137.9 (C), 128.2 (CH), 125.8 (CH), 99.1 (CH), 98.63 (C), 98.56 (CH), 94.8 (C), 77.8 ( $\text{CH}_2$ ), 77.3 ( $\text{CH}_2$ ), 76.69 ( $\text{CH}_2$ ), 76.65 ( $\text{CH}_2$ ), 52.0 (CH), 50.5 ( $\text{CH}_3$ ), 50.1 ( $\text{CH}_3$ ), 49.8 ( $\text{CH}_3$ ), 48.8 ( $\text{CH}_3$ ), 39.4 (CH), 38.1 (CH), 37.6 (CH), 30.2 (C), 30.0 (C), 23.0 ( $\text{CH}_3$ ), 22.9 ( $\text{CH}_3$ ), 21.7 ( $\text{CH}_3 \times 2$ ).

**3k:**  $^1\text{H}$  NMR (300 MHz,  $\text{CDCl}_3$ )  $\delta$  6.13 (dd,  $J = 8.4, 7.2$  Hz, 1H), 5.87 (d,  $J = 8.4$  Hz, 1H), 5.45 (d,  $J = 4.2$  Hz, 1H), 3.56 (s, 3H), 3.48 (s, 3H), 3.42 (s, 3H), 3.32 (s, 3H), 3.37–3.28 (m, 1H), 3.23–3.17 (m, 1H), 3.16 (s, 3H), 3.04 (s, 3H), 3.02–2.96 (m, 1H).  $^{13}\text{C}$  NMR (75 MHz,  $\text{CDCl}_3$ )  $\delta$  201.9 (C), 189.1 (C), 152.2 (C), 130.4 (CH), 129.6 (CH), 110.2 (CH), 98.7 (C), 94.2 (C), 88.6 (C), 77.2 (C), 55.6 ( $\text{CH}_3$ ), 54.2 ( $\text{CH}_3$ ), 50.5 ( $\text{CH}_3$ ), 50.3 ( $\text{CH}_3$ ), 49.2 ( $\text{CH}_3$ ), 48.8 ( $\text{CH}_3$ ), 40.3 (CH), 39.1 (CH), 38.7 (CH).

**General procedure for the synthesis of benzobicyclo[2.2.2]octadienone derivatives 4a-4k:** A solution of dimer **3** (1.0 equiv) and imidazole (2.5 equiv) in *o*-dichlorobenzene (1 mL for 100 mg of dimer **3**) was sealed and subjected to microwave irradiation [Biotage® microwave synthesizer] at appropriate temperature for an appropriate time to give corresponding benzobicyclo[2.2.2]octadien-one products after purification by flash column chromatography using ethyl acetate/hexanes

**4a:**  $^1\text{H}$  NMR (400 MHz,  $\text{CDCl}_3$ )  $\delta$  6.90 (d,  $J = 8.0$  Hz, 1H), 6.78 (d,  $J = 8.0$  Hz, 1H), 6.67–6.58 (m, 2H), 4.64 (dd,  $J = 6.0, 2.4$  Hz, 1H), 4.28 (dd,  $J = 5.6, 2.0$  Hz, 1H), 3.90 (s, 3H), 3.41 (s, 3H), 3.26 (s, 3H).  $^{13}\text{C}$  NMR (100 MHz,  $\text{CDCl}_3$ )  $\delta$  195.8 (C), 148.3 (C), 143.5 (C), 133.3 (CH), 131.6 (CH), 131.1 (C), 128.8 (C), 121.1 (CH), 114.1 (CH), 91.8 (C), 62.4 ( $\text{CH}_3$ ), 56.8 (CH), 50.4 ( $\text{CH}_3$ ), 49.9 ( $\text{CH}_3$ ), 42.2 (CH). HRMS (ESI<sup>+</sup>): calcd. for  $\text{C}_{15}\text{H}_{16}\text{NaO}_5$  [ $\text{M} + \text{Na}$ ] 299.0890; found 299.0899.

**4b:**  $^1\text{H}$  NMR (300 MHz,  $\text{CDCl}_3$ )  $\delta$  7.05 (s, 1H), 6.66 (dd,  $J = 6.9, 2.1$  Hz, 1H), 5.70 (br s, 1H), 4.75 (d,  $J = 2.1$  Hz, 1H), 4.60 (d,  $J = 6.9$  Hz, 1H), 3.87 (s, 3H), 3.41 (s, 3H), 3.27 (s, 3H).  $^{13}\text{C}$  NMR (75 MHz,  $\text{CDCl}_3$ )  $\delta$  192.6 (C), 149.5 (C), 143.1 (C), 131.83 (C), 131.82 (CH), 127.5 (C), 123.0 (C), 118.1 (CH), 114.8 (C), 91.1 (C), 64.6 (CH), 62.6 ( $\text{CH}_3$ ), 50.6 ( $\text{CH}_3$ ), 50.2 ( $\text{CH}_3$ ), 44.2 (CH).

**4c:**  $^1\text{H}$  NMR (400 MHz,  $\text{CDCl}_3$ )  $\delta$  6.79 (s, 1H), 6.61 (t,  $J = 6.4$  Hz, 1H), 6.23 (dd,  $J = 7.6, 2.0$  Hz, 1H), 5.58 (s, 1H), 4.56 (dd,  $J = 6.4, 1.6$  Hz, 1H), 3.89 (s, 3H), 3.41 (s, 3H), 3.26 (s, 3H), 2.25 (s, 3H), 1.65 (s, 3H).  $^{13}\text{C}$  NMR (100 MHz,  $\text{CDCl}_3$ )  $\delta$  197.5 (C), 146.1 (C), 142.8 (C), 137.1 (CH), 133.6 (CH), 130.6 (C), 128.9 (C), 123.0 (C), 120.0 (CH), 92.0 (C), 62.4 ( $\text{CH}_3$ ), 60.3 (C), 50.2 ( $\text{CH}_3$ ), 49.9 ( $\text{CH}_3$ ), 41.5 (CH), 15.8 ( $\text{CH}_3$ ), 12.8 ( $\text{CH}_3$ ). MS (APCI):  $m/z$  found  $\text{C}_{17}\text{H}_{19}\text{O}_5$  [ $\text{M} - \text{H}$ ] 303.

**4d:**  $^1\text{H}$  NMR (400 MHz,  $\text{CDCl}_3$ )  $\delta$  6.64 (s, 1H), 6.19–6.11 (m, 1H), 4.48 (d,  $J = 6.4$  Hz, 1H), 4.20 (d,  $J = 1.6$  Hz, 1H), 3.86 (s, 3H), 3.41 (s, 3H), 3.24 (s, 3H), 2.27 (s, 3H), 1.95 (d,  $J = 1.6$  Hz, 3H).  $^{13}\text{C}$  NMR (100 MHz,  $\text{CDCl}_3$ )  $\delta$  194.6 (C), 147.6 (C), 141.9 (C), 141.4 (C), 131.7 (C), 129.7 (C), 126.9 (C), 125.8 (CH), 115.3 (CH), 92.1 (C), 62.4 ( $\text{CH}_3$ ), 59.0 (CH), 50.4 ( $\text{CH}_3$ ), 49.8 ( $\text{CH}_3$ ), 41.8 (CH), 19.8 ( $\text{CH}_3$ ), 18.0 ( $\text{CH}_3$ ). MS (APCI):  $m/z$  found  $\text{C}_{17}\text{H}_{19}\text{O}_5$   $[\text{M} - \text{H}]^-$  303.

**4e:**  $^1\text{H}$  NMR (400 MHz,  $\text{CDCl}_3$ )  $\delta$  6.79 (s, 1H), 6.66 (dd,  $J = 7.6, 6.4$  Hz, 1H), 6.43 (dd,  $J = 7.6, 1.6$  Hz, 1H), 5.67 (br s, 1H), 4.55 (dd,  $J = 6.4, 1.6$  Hz, 1H), 3.88 (s, 3H), 3.38 (s, 3H), 3.27 (s, 3H), 2.73–2.57 (m, 2H), 2.35–2.25 (m, 1H), 2.15–2.06 (m, 1H), 1.23–1.17 (m, 6H).  $^{13}\text{C}$  NMR (100 MHz,  $\text{CDCl}_3$ )  $\delta$  197.4 (C), 145.6 (C), 142.9 (C), 133.7 (CH), 133.4 (CH), 130.0 (C), 129.3 (C), 129.2 (C), 119.3 (CH), 92.3 (C), 62.5 ( $\text{CH}_3$ ), 59.2 (C), 50.14 ( $\text{CH}_3$ ), 50.11 ( $\text{CH}_3$ ), 41.4 (CH), 23.2 ( $\text{CH}_2$ ), 19.0 ( $\text{CH}_2$ ), 14.0 ( $\text{CH}_3$ ), 8.8 ( $\text{CH}_3$ ). MS (ESI):  $m/z$  found  $\text{C}_{19}\text{H}_{23}\text{O}_5$   $[\text{M} - \text{H}]^-$  331.

**4f:**  $^1\text{H}$  NMR (400 MHz,  $\text{CDCl}_3$ )  $\delta$  6.64 (s, 1H), 6.15–6.10 (m, 1H), 6.02 (br s, 1H), 4.52 (d,  $J = 6.4$  Hz, 1H), 4.27 (d,  $J = 2.0$  Hz, 1H), 3.85 (s, 3H), 3.39 (s, 3H), 3.23 (s, 3H), 2.58 (q,  $J = 7.6$  Hz, 2H), 2.32–2.18 (m, 2H), 1.14 (t,  $J = 7.6$  Hz, 3H), 1.04 (t,  $J = 7.6$  Hz, 3H).  $^{13}\text{C}$  NMR (100 MHz,  $\text{CDCl}_3$ )  $\delta$  196.9 (C), 147.7 (C), 147.1 (C), 141.3 (C), 135.9 (C), 132.1 (C), 126.2 (C), 124.1 (CH), 113.9 (CH), 92.3 (C), 62.1 ( $\text{CH}_3$ ), 57.6 (CH), 50.3 ( $\text{CH}_3$ ), 49.7 ( $\text{CH}_3$ ), 41.5 (CH), 26.7 ( $\text{CH}_2$ ), 25.1 ( $\text{CH}_2$ ), 15.6 ( $\text{CH}_3$ ), 11.4 ( $\text{CH}_3$ ).

**4g:**  $^1\text{H}$  NMR (400 MHz,  $\text{CDCl}_3$ )  $\delta$  6.74 (s, 1H), 6.64 (dd,  $J = 7.6, 6.8$  Hz, 1H), 6.41 (dd,  $J = 7.6, 1.6$  Hz, 1H), 5.59 (br s, 1H), 4.53 (dd,  $J = 6.8, 1.6$  Hz, 1H), 3.88 (s, 3H), 3.38 (s, 3H), 3.26 (s, 3H), 2.69–2.49 (m, 2H), 2.26–2.15 (m, 1H), 2.04–1.94 (m, 1H), 1.69–1.53 (m, 4H), 1.21 (t,  $J = 7.6$  Hz, 3H), 0.96 (t,  $J = 7.6$  Hz, 3H).  $^{13}\text{C}$  NMR (100 MHz,  $\text{CDCl}_3$ )  $\delta$  197.4 (C), 145.8 (C), 142.9 (C), 134.2 (CH), 133.3 (CH), 130.1 (C), 129.3 (C), 127.7 (C), 120.1 (CH), 92.3 (C), 62.5 ( $\text{CH}_3$ ), 58.9 (C), 50.2 ( $\text{CH}_3$ ), 50.1 ( $\text{CH}_3$ ), 41.4 (CH), 32.3 ( $\text{CH}_2$ ), 28.7 ( $\text{CH}_2$ ), 23.0 ( $\text{CH}_2$ ), 17.7 ( $\text{CH}_2$ ), 15.1 ( $\text{CH}_3$ ), 14.1 ( $\text{CH}_3$ ). MS (APCI):  $m/z$  found  $\text{C}_{21}\text{H}_{29}\text{O}_5$   $[\text{M} + \text{H}]^+$  361.

**4h:**  $^1\text{H}$  NMR (400 MHz,  $\text{CDCl}_3$ )  $\delta$  6.64 (s, 1H), 6.14 (dd,  $J = 6.4, 1.6$  Hz, 1H), 4.49 (d,  $J = 6.4$  Hz, 1H), 4.26 (d,  $J = 1.6$  Hz, 1H), 3.87 (s, 3H), 3.40 (s, 3H), 3.24 (s, 3H), 2.55 (t,  $J = 7.6$  Hz, 2H), 2.28–2.14 (m, 2H), 1.62–1.42 (m, 4H), 0.93 (t,  $J = 7.2$  Hz, 3H), 0.85 (t,  $J = 7.2$  Hz, 3H).  $^{13}\text{C}$  NMR (100 MHz,  $\text{CDCl}_3$ )  $\delta$  196.8 (C), 147.5 (C), 145.7 (C), 141.3 (C), 134.7 (C), 131.9 (C), 126.8 (C), 125.4 (CH), 114.5 (CH), 92.3 (C), 62.4 ( $\text{CH}_3$ ), 57.8 (CH), 50.5 ( $\text{CH}_3$ ), 49.8 (CH), 41.7 (CH), 35.9 ( $\text{CH}_2$ ), 34.2 ( $\text{CH}_2$ ), 24.6 ( $\text{CH}_2$ ), 20.2 ( $\text{CH}_2$ ), 13.8 ( $\text{CH}_3$ ), 13.4 ( $\text{CH}_3$ ). HRMS (ESI $^+$ ): calcd. for  $\text{C}_{21}\text{H}_{28}\text{NaO}_5$   $[\text{M} + \text{Na}]$  383.1829; found 383.1837.

**4i:**  $^1\text{H}$  NMR (400 MHz,  $\text{CDCl}_3$ )  $\delta$  7.78 (s, 1H), 7.08 (s, 1H), 6.74 (dd,  $J = 7.6, 2.0$  Hz, 1H), 6.63 (t,  $J = 7.2$  Hz, 1H), 5.53 (s, 1H), 5.42 (s, 1H), 4.66 (dd,  $J = 6.4, 1.6$  Hz, 1H), 3.89 (s, 3H), 3.83–3.73 (m, 4H), 3.72–3.62 (m, 4H), 3.35 (s, 3H), 3.28 (s, 3H), 1.29 (s, 6H), 0.82 (s, 3H), 0.80 (s, 3H).  $^{13}\text{C}$  NMR (100 MHz,  $\text{CDCl}_3$ )  $\delta$  194.0 (C), 147.6 (C), 144.2 (C), 133.6 (C), 132.8 (CH), 131.2 (CH), 126.9 (C), 121.7 (C), 119.2 (CH), 102.2 (CH), 98.9 (CH), 92.3 (C), 77.6 ( $\text{CH}_2$ ), 77.5 ( $\text{CH}_2$ ), 77.4 ( $\text{CH}_2$ ), 77.3 ( $\text{CH}_2$ ), 62.5 (C), 61.5 ( $\text{CH}_3$ ), 50.4 ( $\text{CH}_3$ ), 50.0 ( $\text{CH}_3$ ), 41.2 (CH), 30.34 (C), 30.31 (C), 23.3 ( $\text{CH}_3$ ), 23.0 ( $\text{CH}_3$ ), 21.9 ( $\text{CH}_3$ ), 21.8 ( $\text{CH}_3$ ). MS (ESI):  $m/z$  found  $\text{C}_{27}\text{H}_{37}\text{O}_9$   $[\text{M} + \text{H}]^+$  505.

**4j:**  $^1\text{H}$  NMR (400 MHz,  $\text{CDCl}_3$ )  $\delta$  7.11 (s, 1H), 6.56 (ddd,  $J = 6.0, 1.6, 0.8$  Hz, 1H), 5.58 (br s, 1H), 5.51 (s, 1H), 5.02 (s, 1H), 4.86 (d,  $J = 1.6$  Hz, 1H), 4.60 (d,  $J = 6.8$  Hz, 1H), 3.83 (s, 3H), 3.79–3.70 (m, 2H), 3.68–3.58 (m, 4H), 3.49–3.42 (m, 2H), 3.39 (s, 3H), 3.24 (s, 3H), 1.28 (s, 3H), 1.23 (s, 3H), 0.79 (s, 3H), 0.73 (s, 3H).  $^{13}\text{C}$  NMR (100 MHz,  $\text{CDCl}_3$ )  $\delta$  195.8 (C), 147.8 (C), 143.6 (C), 142.2 (C), 131.8 (C), 130.7 (C), 129.8 (CH), 126.9 (C), 112.4 (CH), 99.4 (CH), 98.9 (CH), 91.9 (C), 77.74 ( $\text{CH}_2$ ), 77.70 ( $\text{CH}_2$ ), 77.14 ( $\text{CH}_2$ ), 76.95 ( $\text{CH}_2$ ), 62.3 ( $\text{CH}_3$ ), 52.8 (CH), 50.4 ( $\text{CH}_3$ ), 50.1 ( $\text{CH}_3$ ), 41.8 (CH), 30.2 (C), 30.1 (C), 23.18 ( $\text{CH}_3$ ), 23.16 ( $\text{CH}_3$ ), 21.9 ( $\text{CH}_3$ ), 21.8 ( $\text{CH}_3$ ). MS (ESI):  $m/z$  found  $\text{C}_{27}\text{H}_{35}\text{O}_9$   $[\text{M} - \text{H}]^-$  503.

**4k:**  $^1\text{H}$  NMR (300 MHz,  $\text{CDCl}_3$ )  $\delta$  6.83 (s, 1H), 6.81–6.62 (m, 2H), 5.56 (s, 1H), 4.61 (dd,  $J = 6.6, 2.1$  Hz, 1H), 3.96 (s, 3H), 3.90 (s, 3H), 3.80 (s, 3H), 3.39 (s, 3H), 3.29 (s, 3H).  $^{13}\text{C}$  NMR (75 MHz,  $\text{CDCl}_3$ )  $\delta$  195.0 (C), 146.8 (C), 143.1 (C), 137.8 (C), 133.3 (CH), 130.2 (CH), 128.4 (C), 122.3 (C), 100.5 (CH), 91.6 (C), 87.6 (C), 61.3 ( $\text{CH}_3$ ), 56.4 ( $\text{CH}_3$ ), 54.6 ( $\text{CH}_3$ ), 50.3 ( $\text{CH}_3$ ), 50.0 ( $\text{CH}_3$ ), 40.2 (CH). MS (ESI):  $m/z$  found  $\text{C}_{17}\text{H}_{21}\text{O}_7$   $[\text{M} + \text{H}]^+$  337.

**General procedure for the preparation of bicyclo[2.2.2] system fused MOB derivatives 5a, 5c, 5d and 5g:** To a solution of benzobicyclo[2.2.2]octadienone (**4**, 1.0 equiv) in methanol (4 mL for 1 mmol of **4**) was added DAIB (1.3 equiv) at 0 °C and the resulting mixture was stirred for 45 min at room temperature. The reaction mixture was concentrated and the residue was purified by column chromatography on silica gel by using a mixture of ethyl acetate and hexanes as eluent to give corresponding MOBs **5**.

**5a:**  $^1\text{H}$  NMR (300 MHz,  $\text{CDCl}_3$ )  $\delta$  6.87 (d,  $J = 9.9$  Hz, 1H), 6.58 (ddd,  $J = 8.1, 6.6, 1.5$  Hz, 1H), 6.49 (ddd,  $J = 7.2, 5.7, 1.5$  Hz, 1H), 5.93 (d,  $J = 9.9$  Hz, 1H), 4.35 (dd,  $J = 6.3, 1.8$  Hz, 1H), 4.04 (dd,  $J = 5.7, 2.0$  Hz, 1H), 3.34 (s, 3H), 3.32 (s, 3H), 3.30 (s, 3H), 3.13 (s, 3H).  $^{13}\text{C}$  NMR (75 MHz,  $\text{CDCl}_3$ )  $\delta$  196.8 (C), 193.8 (C), 146.8 (C), 139.2 (CH), 135.0 (C), 134.4 (CH), 128.4 (CH), 125.4 (CH), 92.5 (C), 90.3 (C), 57.03 (CH), 51.1 ( $\text{CH}_3 \times 2$ ), 50.6 ( $\text{CH}_3$ ), 49.8 ( $\text{CH}_3$ ), 44.1 (CH).

**5c:**  $^1\text{H}$  NMR (400 MHz,  $\text{CDCl}_3$ )  $\delta$  6.69 (app d,  $J = 1.6$  Hz, 1H), 6.56 (t,  $J = 6.4$  Hz, 1H), 6.05 (dd,  $J = 6.4, 1.6$  Hz, 1H), 4.26 (dd,  $J = 6.4, 2.0$  Hz, 1H), 3.34 (s, 3H), 3.30 (s, 3H), 3.29 (s, 3H), 3.11 (s, 3H), 1.86 (d,  $J = 1.6$  Hz, 3H), 1.54 (s, 3H).  $^{13}\text{C}$  NMR (100 MHz,  $\text{CDCl}_3$ )  $\delta$  197.1 (C), 195.7 (C), 144.9 (C), 136.9 (C), 134.7 (CH), 134.4 (CH), 133.0 (C), 132.0 (CH), 92.6 (C), 90.8 (C), 55.9 (C), 51.1 ( $\text{CH}_3$ ), 50.9 ( $\text{CH}_3$ ), 50.6 ( $\text{CH}_3$ ), 49.7 ( $\text{CH}_3$ ), 43.2 (CH), 15.1 ( $\text{CH}_3$ ), 12.6 ( $\text{CH}_3$ ).

**5d:**  $^1\text{H}$  NMR (400 MHz,  $\text{CDCl}_3$ )  $\delta$  6.14 (dt,  $J = 1.6$  Hz, 1H), 5.84 (app t,  $J = 1.2$  Hz, 1H), 4.23 (d,  $J = 6.4$  Hz, 1H), 3.98 (d,  $J = 1.6$  Hz, 1H), 3.34 (s, 3H), 3.33 (s, 3H), 3.30 (s, 3H), 3.17 (s, 3H), 2.09 (d,  $J = 1.6$  Hz, 3H), 1.96 (d,  $J = 1.6$  Hz, 3H).  $^{13}\text{C}$  NMR (100 MHz,  $\text{CDCl}_3$ )  $\delta$  195.8 (C), 194.6 (C), 149.4 (C), 146.9 (C), 138.9 (C), 136.2 (C), 126.9 (CH), 123.6 (CH), 92.4 (C), 90.8 (C), 59.1 (CH), 51.3 ( $\text{CH}_3$ ), 51.2 ( $\text{CH}_3$ ), 50.4 ( $\text{CH}_3$ ), 50.0 ( $\text{CH}_3$ ), 43.6 (CH), 20.6 ( $\text{CH}_3$ ), 19.4 ( $\text{CH}_3$ ).

**5g:**  $^1\text{H}$  NMR (400 MHz,  $\text{CDCl}_3$ )  $\delta$  6.60 (s, 1H), 6.58 (t,  $J = 6.8$  Hz, 1H), 6.26 (dd,  $J = 6.8, 2.0$  Hz, 1H), 4.25 (dd,  $J = 6.4, 1.6$  Hz, 1H), 3.29 (s, 3H), 3.28 (s, 3H), 3.10 (s, 6H), 2.30–2.15 (m, 2H), 2.13–2.03 (m, 1H), 1.91–1.80 (m, 1H), 1.62–1.52 (m, 1H), 1.50–1.38 (m, 3H), 1.08 (t,  $J = 7.2$  Hz, 3H), 0.90 (t,  $J =$

7.2 Hz, 3H).  $^{13}\text{C}$  NMR (100 MHz,  $\text{CDCl}_3$ )  $\delta$  196.9 (C), 195.5 (C), 145.7 (C), 136.84 (C), 136.77 (C), 134.5 (CH), 131.6 (CH), 131.3 (CH), 92.7 (C), 91.2 (C), 59.6 (C), 51.3 ( $\text{CH}_3$ ), 50.9 ( $\text{CH}_3$ ), 50.8 ( $\text{CH}_3$ ), 49.6 ( $\text{CH}_3$ ), 42.9 (CH), 30.9 ( $\text{CH}_2$ ), 28.3 ( $\text{CH}_2$ ), 21.7 ( $\text{CH}_2$ ), 18.0 ( $\text{CH}_2$ ), 14.9 ( $\text{CH}_3$ ), 13.8 ( $\text{CH}_3$ ).

**General procedure for the preparation of benzobicyclo[2.2.2]octadienedione 6:** To benzobicyclo[2.2.2]octadienone **4** (500 mg) was added 2 N aqueous  $\text{H}_2\text{SO}_4$  (10 mL). The reaction mixture was heated to 50 °C for 16 h. The reaction was brought to room temperature and extracted with ethyl acetate. The organic extract was concentrated to give a residue which was purified by column chromatography on silica gel by using a mixture of ethyl acetate and hexanes as eluent to give corresponding benzobicyclo[2.2.2]octadienedione **6**.

**6a:**  $^1\text{H}$  NMR (300 MHz,  $\text{CDCl}_3$ )  $\delta$  7.04 (d,  $J$  = 8.1 Hz, 1H ), 6.97 (d,  $J$  = 8.1 Hz, 1H ), 6.80 (ddd,  $J$  = 7.5, 6.0, 1.8 Hz, 1H), 6.72 (ddd,  $J$  = 7.8, 6.3, 1.8 Hz, 1H), 5.83 (br s, 1H), 4.87 (dd,  $J$  = 6.0, 1.8 Hz, 1H), 4.50 (dd,  $J$  = 6.0, 1.8 Hz, 1H), 3.85 (s, 3H).  $^{13}\text{C}$  NMR (75 MHz,  $\text{CDCl}_3$ )  $\delta$  181.8 (C), 181.4 (C), 149.7 (C), 143.8 (C), 132.9 (CH), 130.9 (CH), 126.8 (C), 126.4 (C), 122.5 (CH), 117.0 (CH), 62.9 ( $\text{CH}_3$ ), 55.1 (CH), 50.2 (CH). MS (ESI):  $m/z$  found  $\text{C}_{13}\text{H}_9\text{O}_4$  [ $\text{M} - \text{H}$ ] $^-$  229.

**6h:**  $^1\text{H}$  NMR (400 MHz,  $\text{CDCl}_3$ )  $\delta$  6.80 (s, 1H), 6.29–6.23 (m, 1H ), 5.72 (br s, 1H ), 4.73 (d,  $J$  = 6.4 Hz, 1H ), 4.47 (d,  $J$  = 2.4 Hz, 1H ), 3.81 (s, 3H), 2.65–2.51 (m, 2H ), 2.38–2.29 (m, 2H ), 1.63–1.48 (m, 4H ), 0.95 (t,  $J$  = 7.6 Hz, 3H), 0.88 (t,  $J$  = 7.6 Hz, 3H).  $^{13}\text{C}$  NMR (100 MHz,  $\text{CDCl}_3$ )  $\delta$  183.0 (C), 182.6 (C), 148.9 (C), 147.9 (C), 141.6 (C), 136.2 (C), 127.6 (C), 124.7 (C), 123.0 (CH), 117.2 (CH), 62.8 ( $\text{CH}_3$ ), 56.1 (CH), 49.5 (CH), 36.2 ( $\text{CH}_2$ ), 34.3 ( $\text{CH}_2$ ), 24.5 ( $\text{CH}_2$ ), 20.3 ( $\text{CH}_2$ ), 13.8 ( $\text{CH}_3$ ), 13.5( $\text{CH}_3$ ).

**General procedure for the preparation of benzoquinoxalinobarralenes 10-13:** A solution of benzobicyclo[2.2.2]octadienedione **6** (1.0 equiv) and *o*-phenylenediamine (1.0 equiv) in a mixture of AcOH / MeOH (1:1, 2 mL for 100 mg of **6**) was stirred at room temperature for 15 min. In the case of reaction between **6a** and *o*-phenylenediamine **7-9**, corresponding benzoquinoxalinobarralenes **10-12** precipitated in the reaction mixture which was filtered and washed with cold methanol to give pure products. However, in the case of reaction between **6h** and **7**, column chromatography was performed to give the corresponding benzoquinoxalinobarralene **13**.

**10:**  $^1\text{H}$  NMR (300 MHz,  $\text{CDCl}_3$ )  $\delta$  8.00–7.80 (m, 2H ), 7.65–7.55 (m, 2H ), 7.20–7.02 (m, 3H ), 6.70 (d,  $J$  = 8.1 Hz, 1H ), 6.51 (br s, 1H), 5.59 (dd,  $J$  = 5.7, 1.5 Hz, 1H ), 5.22 (dd,  $J$  = 6.0, 1.5 Hz, 1H), 3.84 (s, 3H).  $^{13}\text{C}$  NMR (75 MHz,  $\text{CDCl}_3$ )  $\delta$  158.0 (C), 157.3 (C), 147.5 (C), 143.6 (C), 139.2 (CH), 138.5 (C  $\times$  2), 137.0 (CH), 135.1 (C), 134.6 (C), 129.1 (CH), 129.0 (CH), 128.3 (CH  $\times$  2), 120.8 (CH), 113.1 (CH), 62.6 ( $\text{CH}_3$ ), 51.5 (CH), 46.4 (CH). MS (ESI):  $m/z$  found  $\text{C}_{19}\text{H}_{15}\text{N}_2\text{O}_2$  [ $\text{M} + \text{H}$ ] $^+$  303.

**11:**  $^1\text{H}$  NMR (400 MHz,  $\text{CDCl}_3$ )  $\delta$  7.63 (d,  $J$  = 5.6 Hz, 2H ), 7.14 (ddd,  $J$  = 7.2, 6.0, 1.6 Hz, 1H ), 7.07 (d,  $J$  = 8.0 Hz, 1H ), 7.05 (ddd,  $J$  = 7.2, 6.0, 1.6 Hz, 1H), 6.67 (d,  $J$  = 8.0 Hz, 1H), 5.87 (br s, 1H), 5.54 (dd,  $J$  = 6.0, 1.6 Hz, 1H), 5.18 (dd,  $J$  = 6.0, 1.6 Hz, 1H), 3.89 (s, 3H), 2.42 (s, 6H).  $^{13}\text{C}$  NMR (100 MHz,  $\text{CDCl}_3$ )  $\delta$  157.2 (C), 156.4 (C), 147.2 (C), 143.4 (C), 139.3 (CH), 139.1 (C), 138.9 (C), 137.3 (C), 137.2 (C), 137.0 (CH), 135.7 (C), 134.8 (C), 127.8 (CH), 120.7 (CH  $\times$  2), 112.6 (CH), 62.8 ( $\text{CH}_3$ ), 51.6 (CH), 46.6 (CH), 20.14 ( $\text{CH}_3$ ), 20.12 ( $\text{CH}_3$ ). MS (ESI):  $m/z$  found  $\text{C}_{21}\text{H}_{19}\text{N}_2\text{O}_2$  [ $\text{M} + \text{H}$ ] $^+$  331.

**12:**  $^1\text{H}$  NMR (400 MHz, DMSO- $d_6$ )  $\delta$  9.44 (s, 1H), 8.17 (s, 1H), 8.13 (s, 1H), 7.25–7.15 (s, 2H), 7.08 (d,  $J$  = 8.0 Hz, 1H), 6.60 (d,  $J$  = 8.0 Hz, 1H), 5.52 (dd,  $J$  = 5.6, 1.6 Hz, 1H), 5.27 (dd,  $J$  = 6.0, 1.6 Hz, 1H), 3.79 (s, 3H).  $^{13}\text{C}$  NMR (100 MHz, DMSO- $d_6$ )  $\delta$  159.4 (C), 158.9 (C), 148.6 (C), 143.8 (C), 138.9 (CH), 137.2 (CH), 137.1 (C), 134.4 (C), 133.0 (C), 131.5 (C), 131.4 (C), 129.0 (CH), 128.9 (CH), 120.3 (CH), 114.1 (CH), 61.0 (CH<sub>3</sub>), 50.1 (CH), 45.3 (CH). HRMS (ESI<sup>+</sup>): calcd. for C<sub>19</sub>H<sub>13</sub>Cl<sub>2</sub>N<sub>2</sub>O<sub>2</sub> [M + H]<sup>+</sup> 371.0349; found 371.0359.

**13:**  $^1\text{H}$  NMR (400 MHz, CDCl<sub>3</sub>)  $\delta$  7.94–7.83 (m, 2H), 7.64–7.57 (m, 2H), 6.59–6.53 (m, 2H), 6.30 (br s, 1H), 5.45 (d,  $J$  = 6.4 Hz, 1H), 5.19 (d,  $J$  = 1.6 Hz, 1H), 3.82 (s, 3H), 2.70 (t,  $J$  = 7.6 Hz, 2H), 2.37–2.30 (m, 2H), 1.71–1.46 (m, 4H), 0.98 (t,  $J$  = 7.2 Hz, 3H), 0.80 (t,  $J$  = 7.2 Hz, 3H).  $^{13}\text{C}$  NMR (100 MHz, CDCl<sub>3</sub>)  $\delta$  158.5 (C), 158.2 (C), 153.6 (C), 146.9 (C), 141.4 (C), 138.6 (C), 135.2 (C), 134.5 (C), 132.9 (C), 128.84 (CH), 128.75 (CH), 128.7 (CH), 128.3 (CH), 128.2 (CH), 113.6 (CH), 62.6 (CH<sub>3</sub>), 52.3 (CH), 46.0 (CH), 35.8 (CH<sub>2</sub>), 34.5 (CH<sub>2</sub>), 24.7 (CH<sub>2</sub>), 20.2 (CH<sub>2</sub>), 14.0 (CH<sub>3</sub>), 13.7 (CH<sub>3</sub>). MS (ESI):  $m/z$  found C<sub>25</sub>H<sub>27</sub>N<sub>2</sub>O<sub>2</sub> [M + H]<sup>+</sup> 387.

**General procedure for the *O*-alkylation of benzobicyclo[2.2.2]octadienone **4a**:** To a solution of benzobicyclo[2.2.2]octadienone **4a** (1.0 equiv) in CH<sub>3</sub>CN (2.5 mL for 100 mg) was added alkylating agent MeI (2.5 equiv) or allyl bromide (2.0 equiv) or methyl bromoacetate (2.0 equiv) and stirred at room temperature for 16 h. Reaction mixture was filtered, solvents evaporated and the residue was purified by column chromatography on silica gel by using a mixture of ethyl acetate and hexanes as eluent to give corresponding alkylated products **14** - **16**.

**14:**  $^1\text{H}$  NMR (300 MHz, CDCl<sub>3</sub>)  $\delta$  6.94 (d,  $J$  = 7.8 Hz, 1H), 6.74 (d,  $J$  = 7.8 Hz, 1H), 6.65–6.56 (m, 2H), 4.76–4.70 (m, 1H), 4.28–4.24 (m, 1H), 3.89 (s, 3H), 3.85 (s, 3H), 3.40 (s, 3H), 3.26 (s, 3H).  $^{13}\text{C}$  NMR (75 MHz, CDCl<sub>3</sub>)  $\delta$  196.2 (C), 152.1 (C), 145.3 (C), 134.1 (CH), 131.6 (C), 130.9 (CH), 129.2 (C), 120.0 (CH), 110.7 (CH), 92.0 (C), 61.4 (CH<sub>3</sub>), 56.8 (CH), 55.9 (CH<sub>3</sub>), 50.3 (CH<sub>3</sub>), 50.1 (CH<sub>3</sub>), 41.8 (CH).

**15:**  $^1\text{H}$  NMR (300 MHz, CDCl<sub>3</sub>)  $\delta$  6.92 (d,  $J$  = 8.1 Hz, 1H), 6.75 (d,  $J$  = 8.1 Hz, 1H), 6.64–6.58 (m, 2H), 6.14–6.01 (m, 1H), 5.42 (ddd,  $J$  = 17.1, 3.0, 1.5 Hz, 1H), 5.28 (ddd,  $J$  = 10.5, 3.0, 1.5 Hz, 1H), 4.77–4.72 (m, 1H), 4.59–4.54 (m, 2H), 4.28–4.23 (m, 1H), 3.92 (s, 3H), 3.41 (s, 3H), 3.27 (s, 3H).  $^{13}\text{C}$  NMR (75 MHz, CDCl<sub>3</sub>)  $\delta$  196.2 (C), 151.0 (C), 145.7 (C), 134.2 (CH), 133.2 (CH), 131.7 (C), 130.9 (CH), 129.6 (C), 119.9 (CH), 117.5 (CH<sub>2</sub>), 112.5 (CH), 92.0 (C), 69.8 (CH<sub>2</sub>), 61.4 (CH<sub>3</sub>), 56.8 (CH), 50.4 (CH<sub>3</sub>), 50.1 (CH<sub>3</sub>), 41.8 (CH). MS (APCI):  $m/z$  found C<sub>18</sub>H<sub>19</sub>O<sub>5</sub> [M – H]<sup>–</sup> 315.

**16:**  $^1\text{H}$  NMR (400 MHz, CDCl<sub>3</sub>)  $\delta$  6.91 (d,  $J$  = 8.0 Hz, 1H), 6.67 (d,  $J$  = 8.0 Hz, 1H), 6.63–6.56 (m, 2H), 4.74 (app dd,  $J$  = 5.2, 1.6 Hz, 1H), 4.67 (s, 2H), 4.26 (app dd,  $J$  = 5.2, 2.4 Hz, 1H), 3.96 (s, 3H), 3.79 (s, 3H), 3.40 (s, 3H), 3.26 (s, 3H).  $^{13}\text{C}$  NMR (100 MHz, CDCl<sub>3</sub>)  $\delta$  196.1 (C), 169.2 (C), 150.3 (C), 145.9 (C), 134.1 (CH), 132.1 (C), 130.9 (C), 130.8 (CH), 119.9 (CH), 112.6 (CH), 91.9 (C), 66.2 (CH<sub>2</sub>), 61.6 (CH<sub>3</sub>), 56.9 (CH), 52.2 (CH<sub>3</sub>), 50.3 (CH<sub>3</sub>), 50.1 (CH<sub>3</sub>), 41.8 (CH).

**Procedure for Chan-Lam coupling of benzobicyclo[2.2.2]octadienone **4a**:** A mixture of compound **4a** (1.0 equiv), phenylboronic acid (1.5 equiv), Cu(OAc)<sub>2</sub> (2.5 equiv), pyridine (2 equiv), 4 Å MS (2.5 times wt/wt of **4a**) was stirred in dry CH<sub>2</sub>Cl<sub>2</sub> (4 mL) under oxygen balloon at room temperature for 16

h. The reaction mixture was directly passed through celite. After rinsed with further 10 mL of ethyl acetate, it was concentrated by rotatory evaporation. The residue was purified by column chromatography on silica gel to give product **17**.

**17:**  $^1\text{H}$  NMR (300 MHz,  $\text{CDCl}_3$ )  $\delta$  7.35–7.27 (m, 2H), 7.11–7.02 (m, 1H), 6.98–6.90 (m, 3H), 6.84 (d,  $J$  = 7.8 Hz, 1H), 6.69–6.59 (m, 2H), 4.82–4.74 (m, 1H), 4.36–4.29 (m, 1H), 3.91 (s, 3H), 3.42 (s, 3H), 3.29 (s, 3H).  $^{13}\text{C}$  NMR (75 MHz,  $\text{CDCl}_3$ )  $\delta$  195.9 (C), 157.7 (C), 147.9 (C), 147.8 (C), 134.2 (CH), 133.2 (C), 132.3 (C), 130.6 (CH), 129.6 (CH X 2), 122.7 (CH), 120.3 (CH), 120.1 (CH), 117.1 (CH X 2), 91.8 (C), 61.5 ( $\text{CH}_3$ ), 57.2 (CH), 50.4 ( $\text{CH}_3$ ), 50.1 ( $\text{CH}_3$ ), 41.9 (CH). HRMS (APCI $^+$ ): calcd. for  $\text{C}_{21}\text{H}_{21}\text{O}_5$  [ $\text{M} + \text{H}$ ] 353.1384; found 353.1376.

**Procedure for hydrogenation reaction of benzobicyclo[2.2.2]octadienone 4a:** To a solution of compound **4a** (1.0 equiv) in ethyl acetate (4 mL for 100 mg) was added 10% wet Pd-C (30% wt/wt with respect to compound **4a**). The reaction was stirred under hydrogen balloon for 4 h. Reaction mixture was filtered through a pad of celite to give corresponding hydrogenation product **18** in quantitative yield.

**18:**  $^1\text{H}$  NMR (400 MHz,  $\text{CDCl}_3$ )  $\delta$  6.84–6.78 (m, 2H), 5.80 (br s, 1H), 3.90–3.80 (m, 1H merged with 3.87 singlet), 3.87 (s, 3H), 3.50 (dd,  $J$  = 3.2, 2.4 Hz, 1H), 3.42 (s, 3H), 3.25 (s, 3H), 2.23–2.05 (m, 1H), 1.74–1.64 (m, 1H), 1.48–1.37 (m, 1H).  $^{13}\text{C}$  NMR (100 MHz,  $\text{CDCl}_3$ )  $\delta$  203.4 (C), 148.3 (C), 143.2 (C), 132.5 (C), 128.0 (C), 121.7 (CH), 114.5 (CH), 95.3 (C), 62.2 ( $\text{CH}_3$ ), 51.1 (CH), 50.5 ( $\text{CH}_3$ ), 49.7 ( $\text{CH}_3$ ), 37.1 (CH), 23.7 ( $\text{CH}_2$ ), 19.8 ( $\text{CH}_2$ ). MS (ESI):  $m/z$  found  $\text{C}_{15}\text{H}_{17}\text{O}_5$  [ $\text{M} - \text{H}$ ] $^-$  277.

**Procedure for bromination of benzobicyclo[2.2.2]octadienone 4a:** A solution of the compound **4a** (1.0 mmol) in methylene chloride (5 mL) was treated with NBS (1.0 mmol) at room temperature and allowed to stir for 16 h. The solvent was evaporated and the residue taken up in ethyl acetate and water. The organic extracts were collected, dried over  $\text{Na}_2\text{SO}_4$  and concentrated under reduced pressure to give the corresponding bromo phenol **19** after column chromatography using ethyl acetate/hexanes.

**19:**  $^1\text{H}$  NMR (400 MHz,  $\text{CDCl}_3$ )  $\delta$  7.27–7.28 (m, 1H), 7.16 (s, 1H), 6.63–6.58 (m, 2H), 5.80 (br s, 1H), 4.65 (dd,  $J$  = 4.4, 2.8 Hz, 1H), 4.24–4.21 (m, 1H), 3.93 (s, 3H), 3.40 (s, 3H), 3.25 (s, 3H).  $^{13}\text{C}$  NMR (100 MHz,  $\text{CDCl}_3$ )  $\delta$  195.3 (C), 145.5 (C), 144.0 (C), 133.7 (CH), 131.14 (C), 131.11 (CH), 129.6 (C), 123.6 (CH), 107.7 (C), 91.6 (C), 62.1 ( $\text{CH}_3$ ), 56.4 (CH), 50.4 ( $\text{CH}_3$ ), 50.1 ( $\text{CH}_3$ ), 42.0 (CH). HRMS (ESI $^+$ ): calcd. for  $\text{C}_{15}\text{H}_{14}\text{BrO}_5$  [ $\text{M} + \text{H}$ ] 353.0030; found 353.0033.

**Procedure for the Michael type addition of benzobicyclo[2.2.2]octadienone 4a to ethylpropiolate:** A solution of the benzobicyclo[2.2.2]octadienone **4a** (1.0 equiv), ethyl propiolate (1.5 equiv), and  $\text{Et}_3\text{N}$  (2.0 equiv) in THF was stirred at room temperature for 16 h. The reaction was diluted with water and extracted with ethyl acetate. The organic extracts were collected, dried over  $\text{Na}_2\text{SO}_4$  and concentrated under reduced pressure to give the corresponding bromo phenoxyacrylate **20** after column chromatography using ethyl acetate/hexanes.

**20:**  $^1\text{H}$  NMR (300 MHz,  $\text{CDCl}_3$ )  $\delta$  7.61 (d,  $J$  = 12.3 Hz, 1H ), 6.66–6.57 (m, 2H), 5.30 (d,  $J$  = 12.3 Hz, 1H ), 4.69 (dd,  $J$  = 5.4, 2.4 Hz, 1H), 4.33–4.28 (m, 1H), 4.15 (q,  $J$  = 7.2 Hz, 2H ), 3.86 (s, 3H), 3.40 (s, 3H), 3.24 (s, 3H), 1.25 (t,  $J$  = 7.2 Hz, 3H ).  $^{13}\text{C}$  NMR (75 MHz,  $\text{CDCl}_3$ )  $\delta$  194.7 (C), 166.8 (C), 159.9 (CH), 148.8 (C), 144.5 (C), 136.1 (C), 133.9 (CH), 132.4 (C), 130.5 (CH), 124.3 (CH), 114.3 (C), 101.1 (CH), 91.2 (C), 61.9 ( $\text{CH}_3$ ), 60.1 ( $\text{CH}_2$ ), 56.9 (CH), 50.4 ( $\text{CH}_3$ ), 50.1 ( $\text{CH}_3$ ), 41.9 (CH), 14.2 ( $\text{CH}_3$ ).

**Procedure for the intramolecular Heck type Coupling of compound 20:** Bromo phenoxyarylate **20** (1.0 equiv) in DMF was degassed using argon balloon.  $\text{Pd}(\text{OAc})_2$  (0.4 equiv),  $\text{PPh}_3$  (0.8 equiv), and  $\text{K}_2\text{CO}_3$  (1.0 equiv) were added in sequence. The mixture was then heated at 110 °C overnight and then cooled to room temperature and diluted with water and ethyl acetate. The organic extracts were collected, dried over  $\text{Na}_2\text{SO}_4$  and concentrated under reduced pressure to give the corresponding benzofuran derivative **21** after column chromatography using ethyl acetate/hexanes.

**21:**  $^1\text{H}$  NMR (300 MHz,  $\text{CDCl}_3$ )  $\delta$  8.22 (s, 1H ), 7.62 (s, 1H), 6.69–6.59 (m, 2H ), 4.84 (dd,  $J$  = 5.7, 2.4 Hz, 1H), 4.43 (dd,  $J$  = 5.7, 2.4 Hz, 1H), 4.39 (q,  $J$  = 7.2 Hz, 2H ), 4.24 (s, 3H), 3.42 (s, 3H), 3.26 (s, 3H), 1.41 (t,  $J$  = 7.2 Hz, 3H ).  $^{13}\text{C}$  NMR (75 MHz,  $\text{CDCl}_3$ )  $\delta$  196.2 (C), 163.1 (C), 150.7 (CH), 145.9 (C), 141.0 (C), 134.6 (CH), 134.3 (C), 130.7 (CH), 126.2 (C), 125.6 (C), 115.1 (C), 111.9 (CH), 92.0 (C), 60.8 ( $\text{CH}_2$ ), 60.7 ( $\text{CH}_3$ ), 57.7 (CH), 50.5 ( $\text{CH}_3$ ), 49.9 ( $\text{CH}_3$ ), 41.4 (CH), 14.3 ( $\text{CH}_3$ ).

**Procedure for vinyl Grignard addition to benzobicyclo[2.2.2]octadienone 14:** To a solution of benzobicyclo[2.2.2]octadienone **14** (1.0 equiv) in THF at -78 °C was added vinylmagnesium bromide (1.0 M in THF, 4.0 equiv). The reaction mixture was brought to room temperature and stirred for 16 h. Reaction mixture was quenched with saturated  $\text{NH}_4\text{Cl}$  followed by extraction with ethyl acetate. The organic extracts were collected, dried over  $\text{Na}_2\text{SO}_4$  and concentrated under reduced pressure to give inseparable mixture of products **22** after column chromatography using ethyl acetate/hexanes.

**22:** The selected  $^1\text{H}$  and  $^{13}\text{C}$  NMR data of major and minor isomers presented here was taken from the spectra of isomeric mixture of **22**. Major isomer :  $^1\text{H}$  NMR (300 MHz,  $\text{CDCl}_3$ )  $\delta$  6.95 (d,  $J$  = 7.8 Hz, 1H ), 6.70 (d,  $J$  = 7.8 Hz, 1H ), 6.56–6.42 (m, 2H ), 6.02 (dd,  $J$  = 17.1, 10.8 Hz, 1H), 5.50 (dd,  $J$  = 17.1, 2.1 Hz, 1H), 5.11 (dd,  $J$  = 10.8, 2.1 Hz, 1H), 4.56 (dd,  $J$  = 6.0, 1.5 Hz, 1H), 3.87 (s, 3H), 3.85 (s, 3H), 3.57 (dd,  $J$  = 6.3, 1.8 Hz, 1H), 3.30 (s, 3H), 3.27 (s, 3H). Minor isomer:  $^1\text{H}$  NMR (300 MHz,  $\text{CDCl}_3$ )  $\delta$  6.86 (d,  $J$  = 8.1 Hz, 1H ), 6.68 (d,  $J$  = 8.1 Hz, 1H ), 6.64–6.46 (m, 2H ), 5.48–5.43 (m, 2H ), 4.99 (t,  $J$  = 6.3 Hz, 1H), 4.56 (dd,  $J$  = 6.0, 1.5 Hz, 1H), 3.86 (s, 3H), 3.84 (s, 3H), 3.62 (dd,  $J$  = 6.0, 1.8 Hz, 1H), 3.38 (s, 3H), 3.18 (s, 3H).  $^{13}\text{C}$  NMR (75 MHz,  $\text{CDCl}_3$ )  $\delta$  151.0 (C), 144.8 (C), 142.0 (CH major), 141.2 (CH minor), 135.9 (CH minor), 134.6 (CH major), 133.6 (C), 132.2 (C), 131.9 (CH major), 131.8 (CH minor), 121.2 (CH major), 120.1 (CH minor), 112.1 ( $\text{CH}_2$  major ), 111.7 ( $\text{CH}_2$  major), 109.5 (CH minor), 109.4 (CH major), 105.1 (C), 61.50 (C major), 61.49 ( $\text{CH}_3$ ), 55.8 ( $\text{CH}_3$  major and minor), 55.61 (C), 55.59 (CH major), 51.41 ( $\text{CH}_3$  major), 51.02 ( $\text{CH}_3$  major), 50.8 ( $\text{CH}_3$  major), 50.6 ( $\text{CH}_3$  minor), 42.7 (CH major), 42.3 (CH minor).

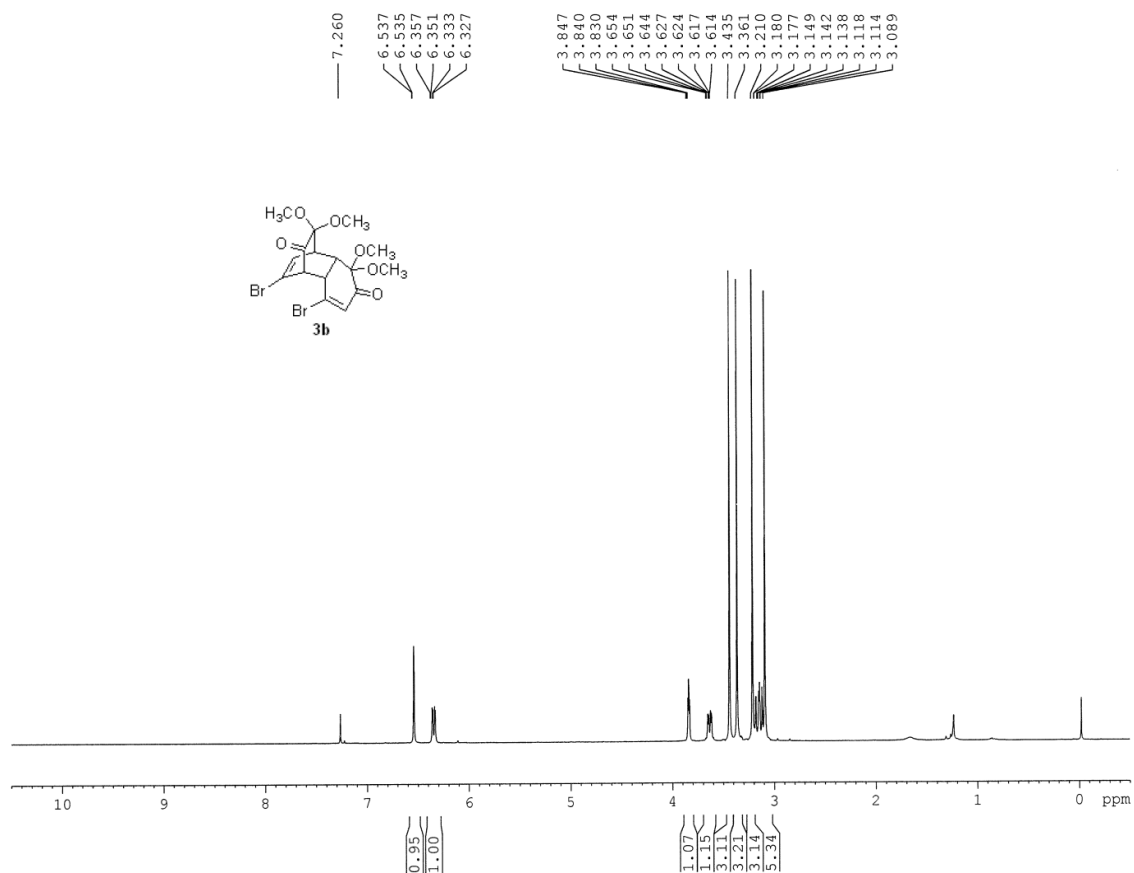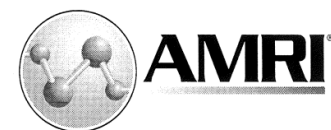

Current Data Parameters

NAME SG-RKP-H-5-BR  
EXPNO 10  
PROCNO 1

F2 - Acquisition Parameters

Date 20140716  
Time 20.09  
INSTRUM spect  
PROBHD 5 mm QNP 1H/13  
PULPROG zg30  
TD 32768  
SOLVENT CDCl3  
NS 16  
DS 2  
SWH 5995.204 Hz  
FIDRES 0.182959 Hz  
AQ 2.7329011 sec  
RG 181  
DW 83.400 usec  
DE 6.00 usec  
TE 300.0 K  
D1 1.00000000 sec  
MCREST 0 sec  
MCWRK 0.01500000 sec

CHANNEL f1

NUC1 1H  
P1 12.20 usec  
PL1 0 dB  
SFO1 300.1319508 MHz

F2 - Processing parameters

SI 16384  
SF 300.1300063 MHz  
WDW EM  
SSB 0  
LB 0.30 Hz  
GB 0  
PC 1.00

Name \_\_\_\_\_

Date \_\_\_\_\_

NB # \_\_\_\_\_

# AMRI; SRC location; 15

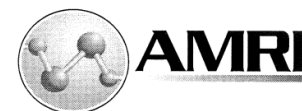

Name \_\_\_\_\_  
Date \_\_\_\_\_  
NB # \_\_\_\_\_

198.778  
190.013  
144.395  
132.706  
130.768  
117.903  
98.256  
94.315  
77.423  
76.999  
76.575  
61.697  
50.782  
50.409  
49.738  
48.958  
48.642  
42.245  
39.295

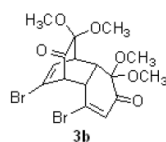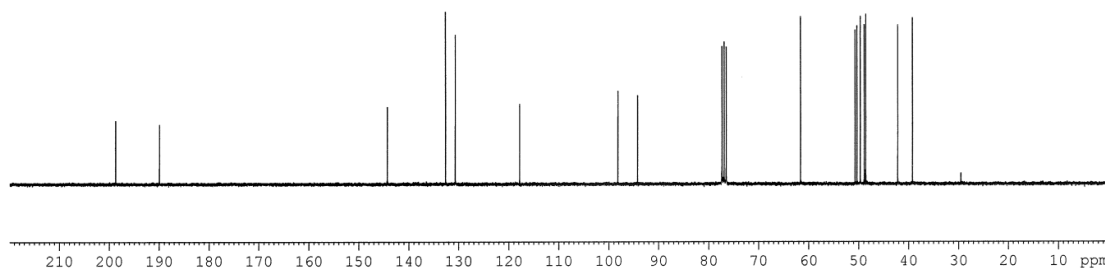

Current Data Parameters  
NAME SG-RKP-H-5-BR  
EXPNO 11  
PROCNO 1  
F2 - Acquisition Parameters  
Date 20140716  
Time 21.31  
INSTRUM spect  
PROBHD 5 mm QNP 1H/13  
PULPROG zgpg30  
TD 65536  
SOLVENT CDCl3  
NS 2400  
DS 0  
SWH 22675.736 Hz  
FIDRES 0.346004 Hz  
AQ 1.4451188 sec  
RG 3649.1  
DW 22.050 usec  
DE 6.00 usec  
TE 300.0 K  
D1 0.50000000 sec  
d11 0.03000000 sec  
DELTA 0.40000001 sec  
MCREST 0 sec  
MCWRK 0.01500000 sec

===== CHANNEL f1 =====  
NUC1 13C  
P1 8.00 usec  
PL1 -2.00 dB  
SFO1 75.4767751 MHz

===== CHANNEL f2 =====  
CPDPRG2 waltz16  
NUC2 1H  
PCPD2 80.00 usec  
PL2 0 dB  
PL12 16.33 dB  
PL13 16.00 dB  
SFO2 300.1315007 MHz

F2 - Processing parameters  
SI 131072  
SF 75.4677520 MHz  
WDW EM  
SSB 0  
LB 0.30 Hz  
GB 0  
PC 1.40

AMRI SRC  
location; 17

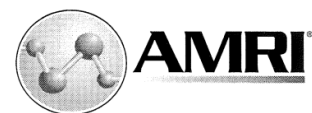

Name \_\_\_\_\_  
Date \_\_\_\_\_  
NB # \_\_\_\_\_

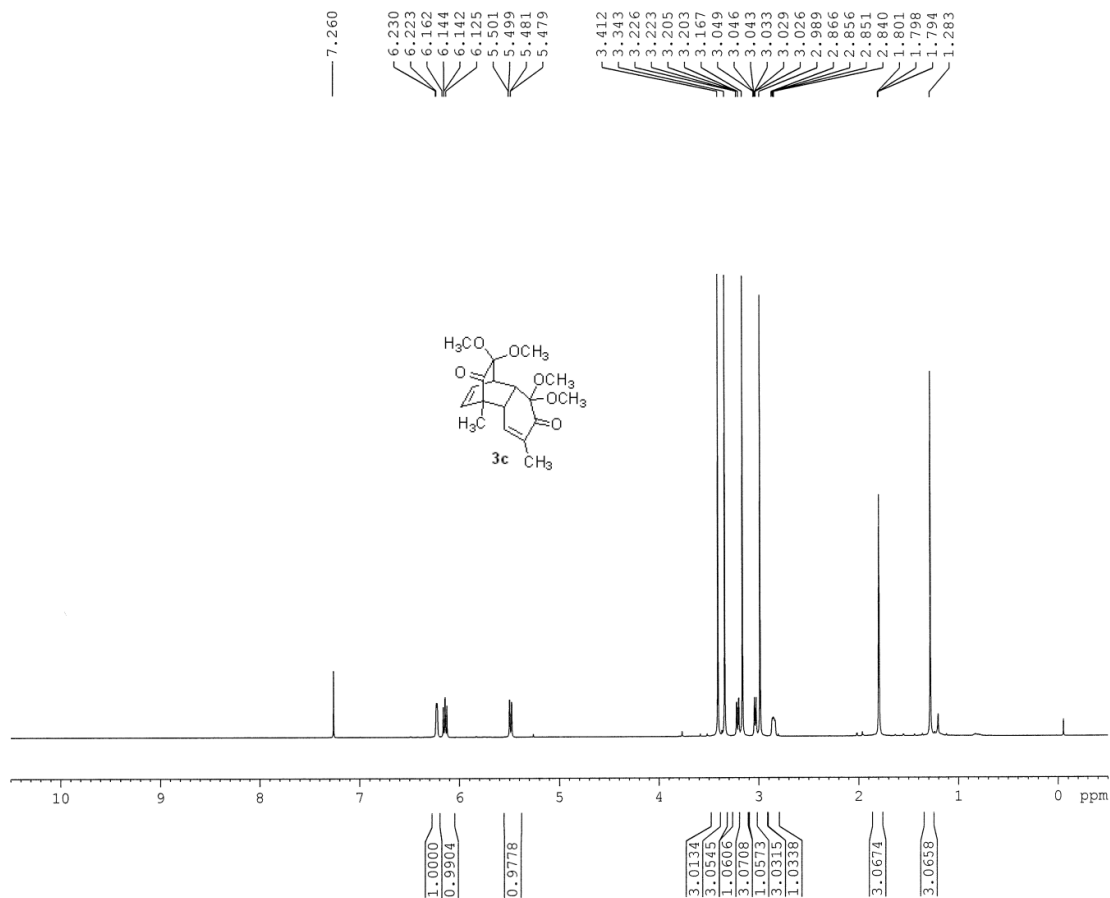

NAME SG-BCK-6-Me-dimer  
 EXPNO 10  
 PROCNO 1  
 Date 20140716  
 Time 21.01  
 INSTRUM spect  
 PROBHD 5 mm PABBO BB-  
 PULPROG zg30  
 TD 65536  
 SOLVENT CDCl3  
 NS 16  
 DS 2  
 SWH 8012.820 Hz  
 FIDRES 0.122266 Hz  
 AQ 4.0894966 sec  
 RG 28.5  
 DW 62.400 usec  
 DE 6.50 usec  
 TE 300.0 K  
 D1 1.00000000 sec  
 TD0 1

===== CHANNEL f1 =====  
 NUC1 1H  
 P1 10.70 usec  
 PL1 -3.00 dB  
 PL1W 19.34582710 W  
 SFO1 400.1318542 MHz  
 SI 32768  
 SF 400.1300092 MHz  
 WDW EM  
 SSB 0  
 LB 0.30 Hz  
 GB 0  
 PC 1.00

# AMRI SRC location; 17

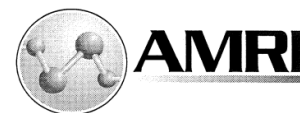

— 204.021  
— 195.039

138.972  
137.092  
133.886  
131.339

98.667  
94.587

77.319  
77.000  
76.683

54.145  
50.378  
50.222  
49.462  
48.784  
43.062  
39.817  
39.350

16.122  
15.557

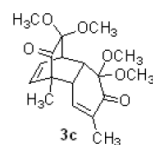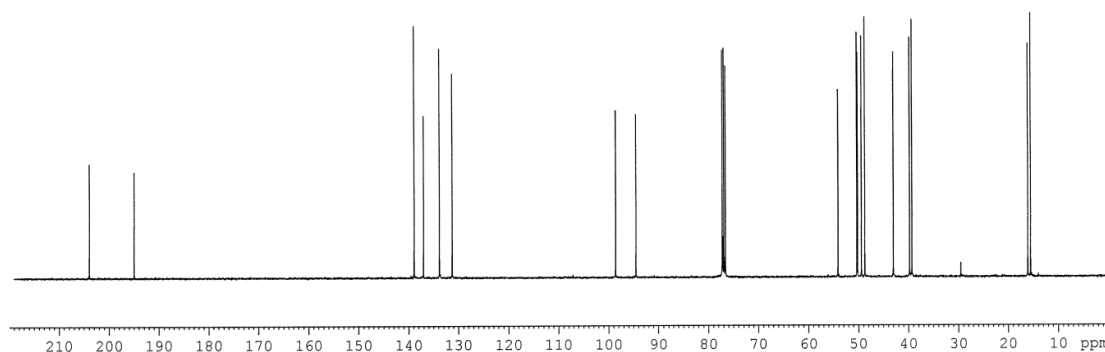

Name \_\_\_\_\_  
Date \_\_\_\_\_  
NB # \_\_\_\_\_

NAME SG-BCK-6-Me-dimer  
EXPNO 11  
PROCNO 1  
Date\_ 20140716  
Time 22.58  
INSTRUM spect  
PROBHD 5 mm PABBO BB-  
PULPROG zgpg30  
TD 65536  
SOLVENT CDCl3  
NS 2000  
DS 4  
SWH 23980.814 Hz  
FIDRES 0.365918 Hz  
AQ 1.3664756 sec  
RG 14596.5  
DW 20.850 usec  
DE 6.50 usec  
TE 300.0 K  
D1 2.00000000 sec  
D11 0.03000000 sec  
TD0 1

===== CHANNEL f1 =====  
NUC1 13C  
P1 7.10 usec  
PL1 -4.00 dB  
PL1W 82.02445221 W  
SFO1 100.6228298 MHz

===== CHANNEL f2 =====  
CPDPRG2 waltz16  
NUC2 1H  
PCPD2 80.00 usec  
PL2 -3.00 dB  
PL12 14.47 dB  
PL13 15.06 dB  
PL2W 19.34582710 W  
PL12W 0.34640750 W  
PL13W 0.30240381 W  
SFO2 400.1316005 MHz  
SI 32768  
SF 100.6127763 MHz  
WDW EM  
SSB 0  
LB 1.00 Hz  
GB 0  
PC 1.40

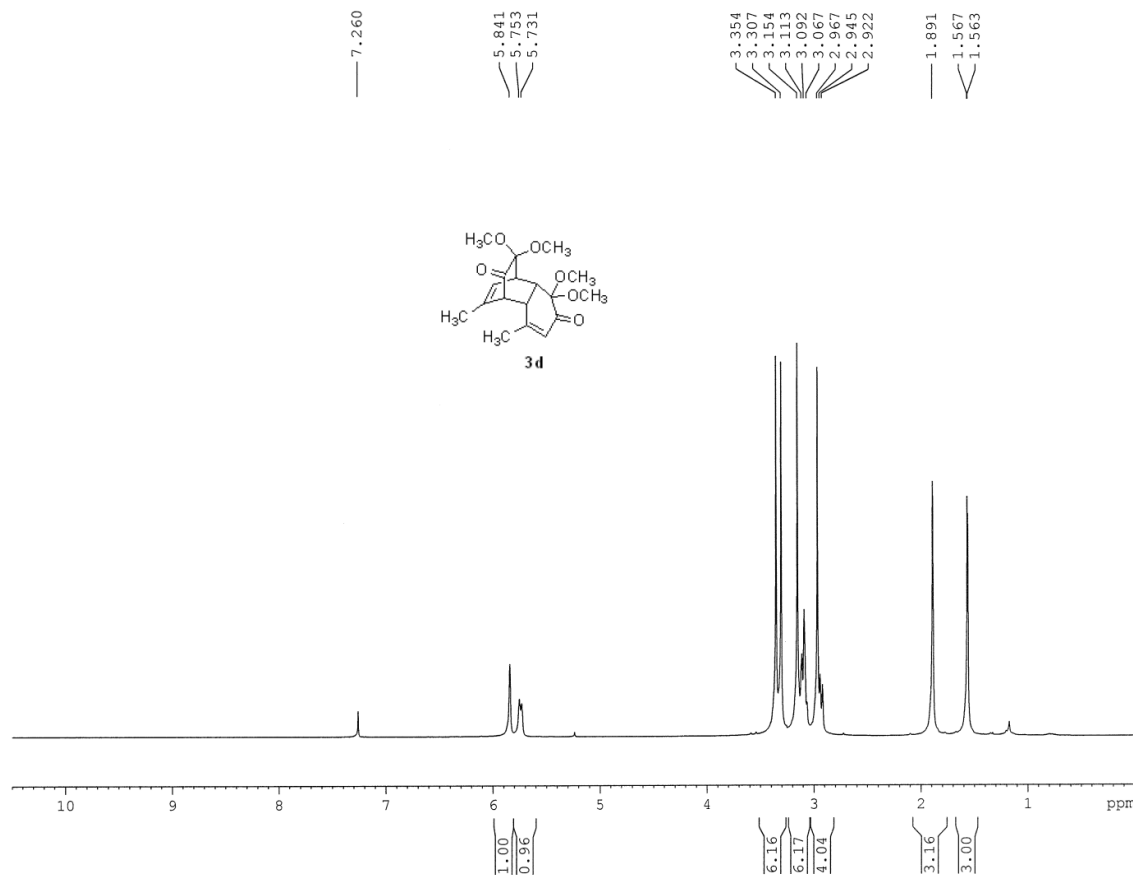

NAME SG-BCK-5Me-dimer  
EXPNO 10  
PROCNO 1  
Date\_ 20140716  
Time 2.23  
INSTRUM spect  
PROBHD 5 mm QNP 1H/13  
PULPROG zg30  
TD 32768  
SOLVENT CDCl3  
NS 16  
DS 2  
SWH 5995.204 Hz  
FIDRES 0.182959 Hz  
AQ 2.7329011 sec  
RG 57  
DW 83.400 usec  
DE 6.00 usec  
TE 300.0 K  
D1 1.00000000 sec  
MCREST 0.00000000 sec  
MCWRK 0.01500000 sec

===== CHANNEL f1 =====  
NUC1 1H  
P1 12.20 usec  
PL1 0.00 dB  
SFO1 300.1319508 MHz  
SI 16384  
SF 300.1300063 MHz  
WDW EM  
SSB 0  
LB 0.30 Hz  
GB 0  
PC 1.00

Name \_\_\_\_\_

Date \_\_\_\_\_

NB # \_\_\_\_\_

# AMRI; SRC location; 15

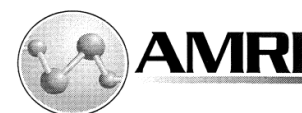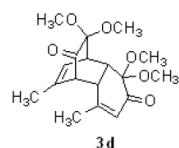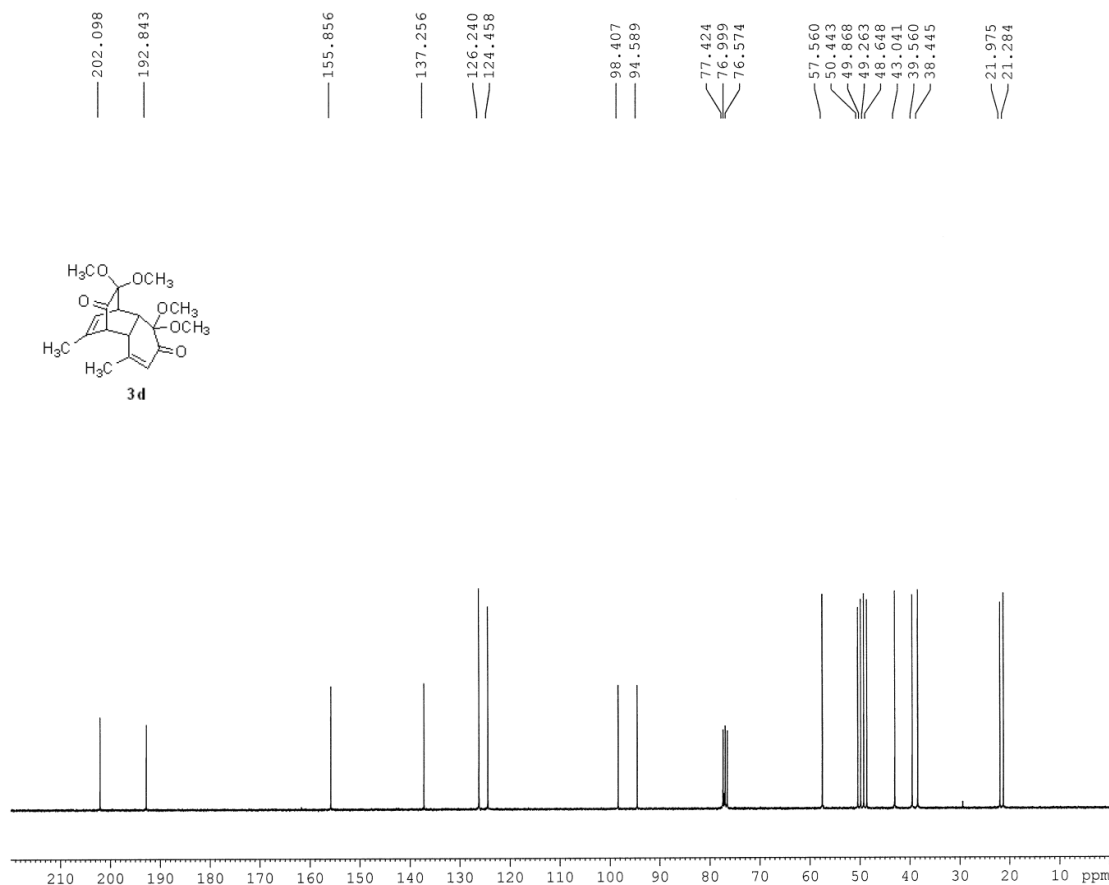

Name \_\_\_\_\_  
Date \_\_\_\_\_  
NB # \_\_\_\_\_

NAME SG-BCK-5Me-dimer  
EXPNO 1  
PROCNO 1  
Date\_ 20140716  
Time\_ 4.05  
INSTRUM spect  
PROBHD 5 mm QNP 1H/13  
PULPROG zgpg30  
TD 65536  
SOLVENT CDCl3  
NS 3000  
DS 0  
SWH 22675.736 Hz  
FIDRES 0.346004 Hz  
AQ 1.4451189 sec  
RG 3251  
DW 22.050 usec  
DE 6.00 usec  
TE 300.0 K  
D1 0.5000000 sec  
d11 0.0300000 sec  
DELTA 0.4000001 sec  
MCREST 0.0000000 sec  
MCWRK 0.0150000 sec

===== CHANNEL f1 =====  
NUC1 13C  
P1 8.00 usec  
PL1 -2.00 dB  
SFO1 75.4767751 MHz

===== CHANNEL f2 =====  
CPDPRG2 waltz16  
NUC2 1H  
PCPD2 80.00 usec  
PL2 0.00 dB  
PL12 16.33 dB  
PL13 16.00 dB  
SFO2 300.1315007 MHz  
SI 131072  
SF 75.4677578 MHz  
WDW EM  
SSB 0  
LB 0.30 Hz  
GB 0  
PC 1.40

AMRI; SRC AV400  
location; 18

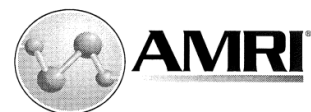

Name \_\_\_\_\_

Date \_\_\_\_\_

NB # \_\_\_\_\_

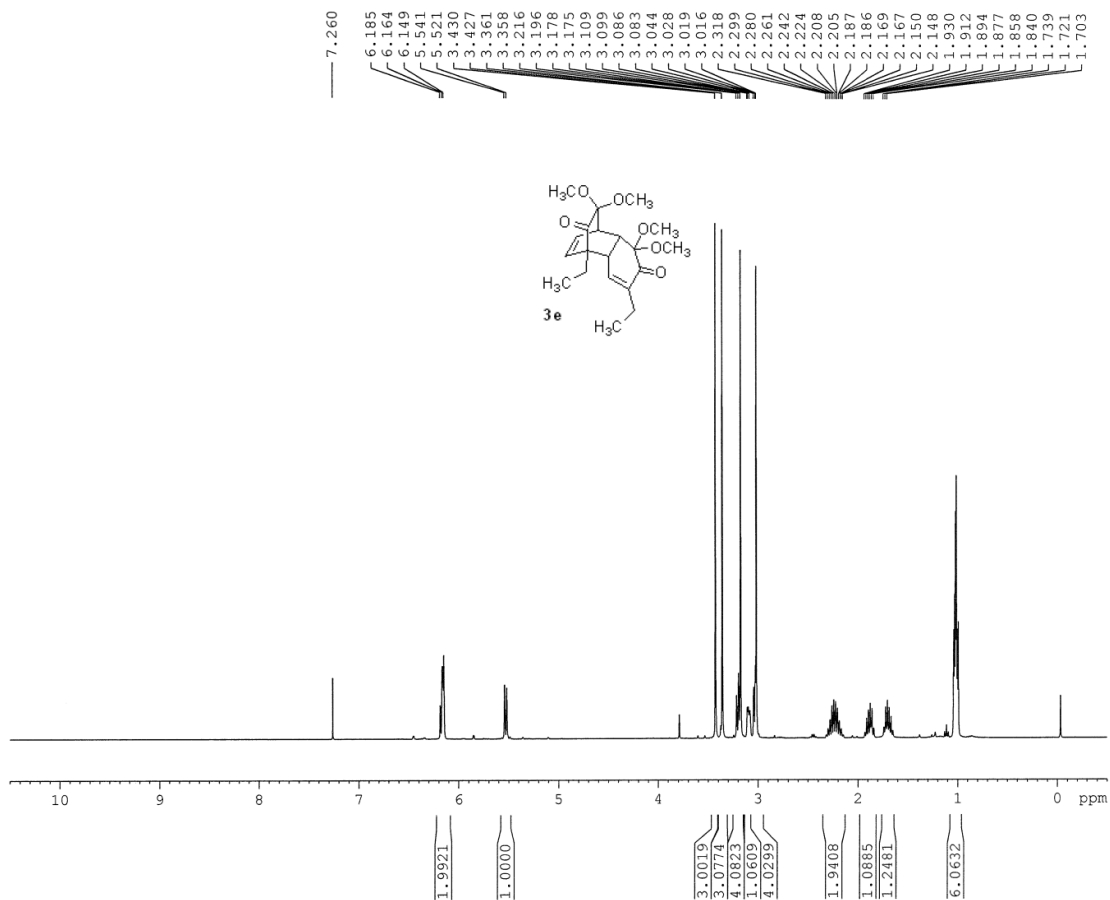

Current Data Parameters  
NAME SG-6Et-Dimer  
EXPNO 10  
PROCNO 1

F2 - Acquisition Parameters  
Date\_ 20140726  
Time 2.26  
INSTRUM spect  
PROBHD 5 mm PABBO BB-  
PULPROG zg30  
TD 65536  
SOLVENT CDCl3  
NS 16  
DS 2  
SWH 8012.820 Hz  
FIDRES 0.122266 Hz  
AQ 4.0894966 sec  
RG 50.8  
DW 62.400 usec  
DE 6.00 usec  
TE 300.0 K  
D1 1.00000000 sec  
TD0 1

===== CHANNEL f1 =====  
NUC1 1H  
P1 10.70 usec  
PL1 -2.00 dB  
PL1W 14.33185768 W  
SFO1 400.2330885 MHz

F2 - Processing parameters  
SI 32768  
SF 400.2300118 MHz  
WDW EM  
SSB 0  
LB 0.30 Hz  
GB 0  
PC 1.00

AMRI; SRC AV400  
location; 18

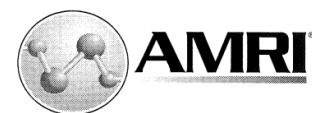

— 203.839  
— 194.739

— 142.705  
— 137.500  
— 133.022  
— 131.318

— 98.760  
— 94.881

— 77.320  
— 77.002  
— 76.684

— 58.004  
— 50.414  
— 50.110  
— 49.615  
— 48.827  
— 40.370  
— 39.661  
— 39.381

— 23.034  
— 22.318  
— 12.664  
— 9.055

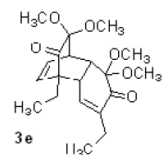

Name \_\_\_\_\_  
Date \_\_\_\_\_  
NB # \_\_\_\_\_

Current Data Parameters  
NAME SG-6Et-Dimer  
EXPNO 11  
PROCNO 1

F2 - Acquisition Parameters  
Date 20140726  
Time 5.09  
INSTRUM spect  
PROBHD 5 mm PABBO BB-  
PULPROG zgpg30  
TD 65536  
SOLVENT CDCl3  
NS 5000  
DS 4  
SWH 24038.461 Hz  
FIDRES 0.366798 Hz  
AQ 1.3631988 sec  
RG 114  
DW 20.800 usec  
DE 6.50 usec  
TE 300.0 K  
D1 0.50000000 sec  
D11 0.03000000 sec  
TD0 1

===== CHANNEL f1 =====  
NUC1 13C  
P1 8.60 usec  
PL1 -1.00 dB  
PL1W 44.58811569 W  
SFO1 100.6479769 MHz

===== CHANNEL f2 =====  
CPDPRG2 waltz16  
NUC2 1H  
PCPD2 80.00 usec  
PL2 -2.00 dB  
PL12 15.47 dB  
PL13 15.72 dB  
PL2W 14.33185768 W  
PL12W 0.25662708 W  
PL13W 0.24227159 W  
SFO2 400.2316009 MHz

F2 - Processing parameters  
SI 32768  
SF 100.6379187 MHz  
WDW EM  
SSB 0  
LB 1.00 Hz  
GB 0  
PC 1.40

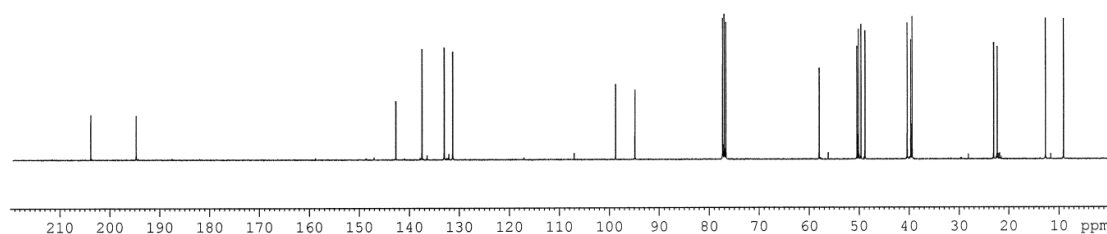

AMRI; SRC AV400  
location; 18

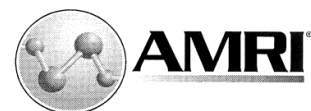

Name \_\_\_\_\_  
Date \_\_\_\_\_  
NB # \_\_\_\_\_

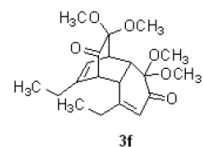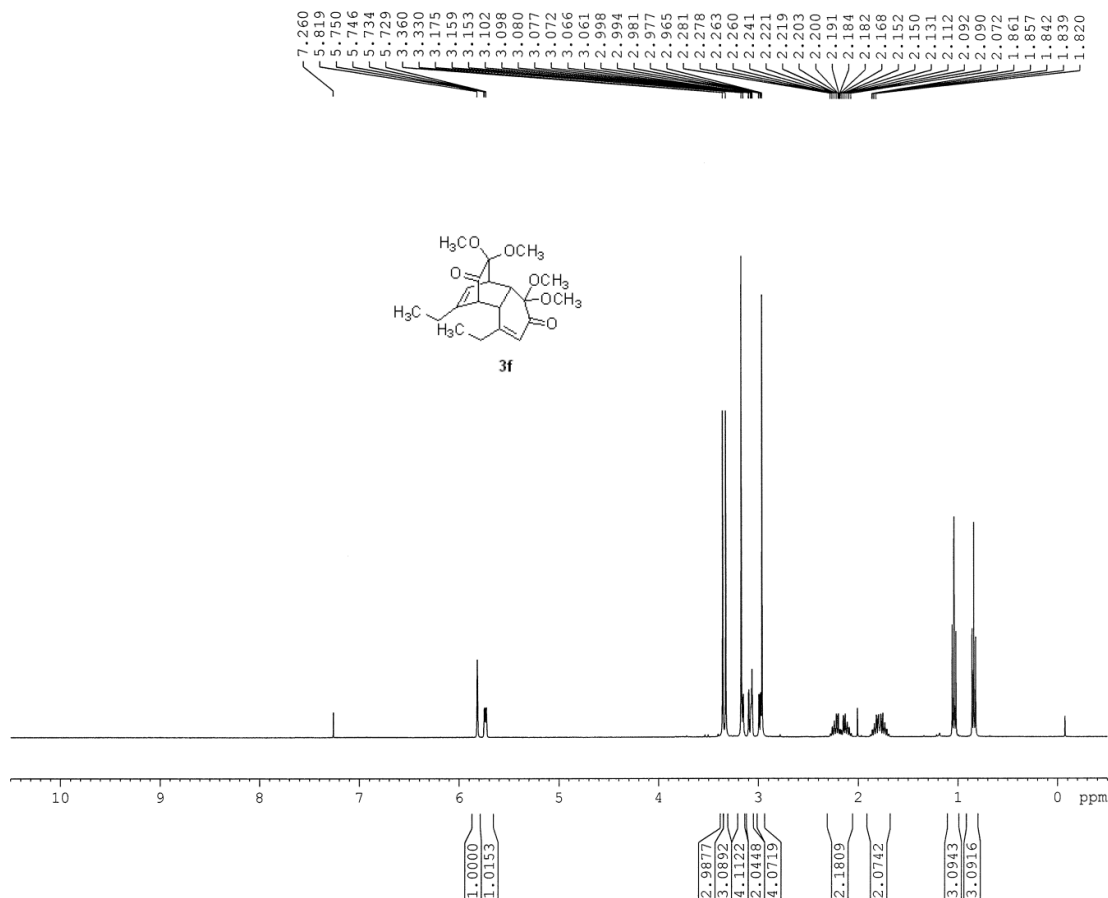

Current Data Parameters  
NAME SG-5Et-Dimer  
EXPNO 10  
PROCNO 1

F2 - Acquisition Parameters  
Date\_ 20140725  
Time 21.07  
INSTRUM spect  
PROBHD 5 mm PABBO BB-  
PULPROG zg30  
TD 65536  
SOLVENT CDCl3  
NS 16  
DS 2  
SWH 8012.820 Hz  
FIDRES 0.122266 Hz  
AQ 4.0894966 sec  
RG 32  
DW 62.400 usec  
DE 6.00 usec  
TE 300.0 K  
D1 1.00000000 sec  
TD0 1

===== CHANNEL f1 =====  
NUC1 1H  
P1 10.70 usec  
PL1 -2.00 dB  
PL1W 14.33185768 W  
SFO1 400.2330885 MHz

F2 - Processing parameters  
SI 32768  
SF 400.2300115 MHz  
WDW EM  
SSB 0  
LB 0.30 Hz  
GB 0  
PC 1.00

AMRI; SRC AV400  
location; 18

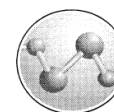

**AMRI**

202.274  
193.307  
161.432  
142.471  
123.696  
123.002  
98.691  
94.725  
77.321  
77.003  
76.684  
57.086  
50.410  
49.843  
49.400  
48.772  
41.679  
39.402  
38.465  
28.033  
27.843  
11.581  
10.429

Name \_\_\_\_\_  
Date \_\_\_\_\_  
NB # \_\_\_\_\_

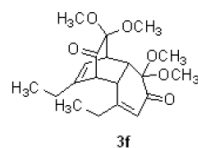

Current Data Parameters  
NAME SG-5Et-Dimer  
EXPNO 11  
PROCNO 1

F2 - Acquisition Parameters  
Date 20140725  
Time 23.50  
INSTRUM spect  
PROBHD 5 mm PABBO BB-  
PULPROG zgpg30  
TD 65536  
SOLVENT CDCl3  
NS 5000  
DS 4  
SWH 24038.461 Hz  
FIDRES 0.366798 Hz  
AQ 1.3631988 sec  
RG 161  
DW 20.800 usec  
DE 6.50 usec  
TE 300.0 K  
D1 0.50000000 sec  
D11 0.03000000 sec  
TD0 1

===== CHANNEL f1 =====  
NUC1 13C  
P1 8.60 usec  
PL1 -1.00 dB  
PL1W 44.58811569 W  
SFO1 100.6479769 MHz

===== CHANNEL f2 =====  
CPDPRG2 waltz16  
NUC2 1H  
PCPD2 80.00 usec  
PL2 -2.00 dB  
PL12 15.47 dB  
PL13 15.72 dB  
PL2W 14.33185768 W  
PL12W 0.25662708 W  
PL13W 0.24227159 W  
SFO2 400.2316009 MHz

F2 - Processing parameters  
SI 32768  
SF 100.6379242 MHz  
WDW EM  
SSB 0  
LB 1.00 Hz  
GB 0  
PC 1.40

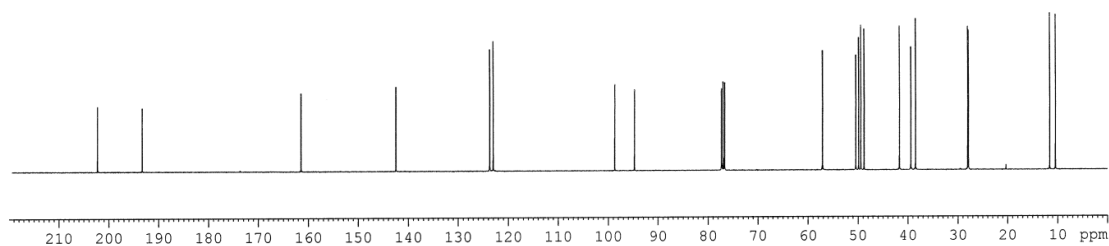

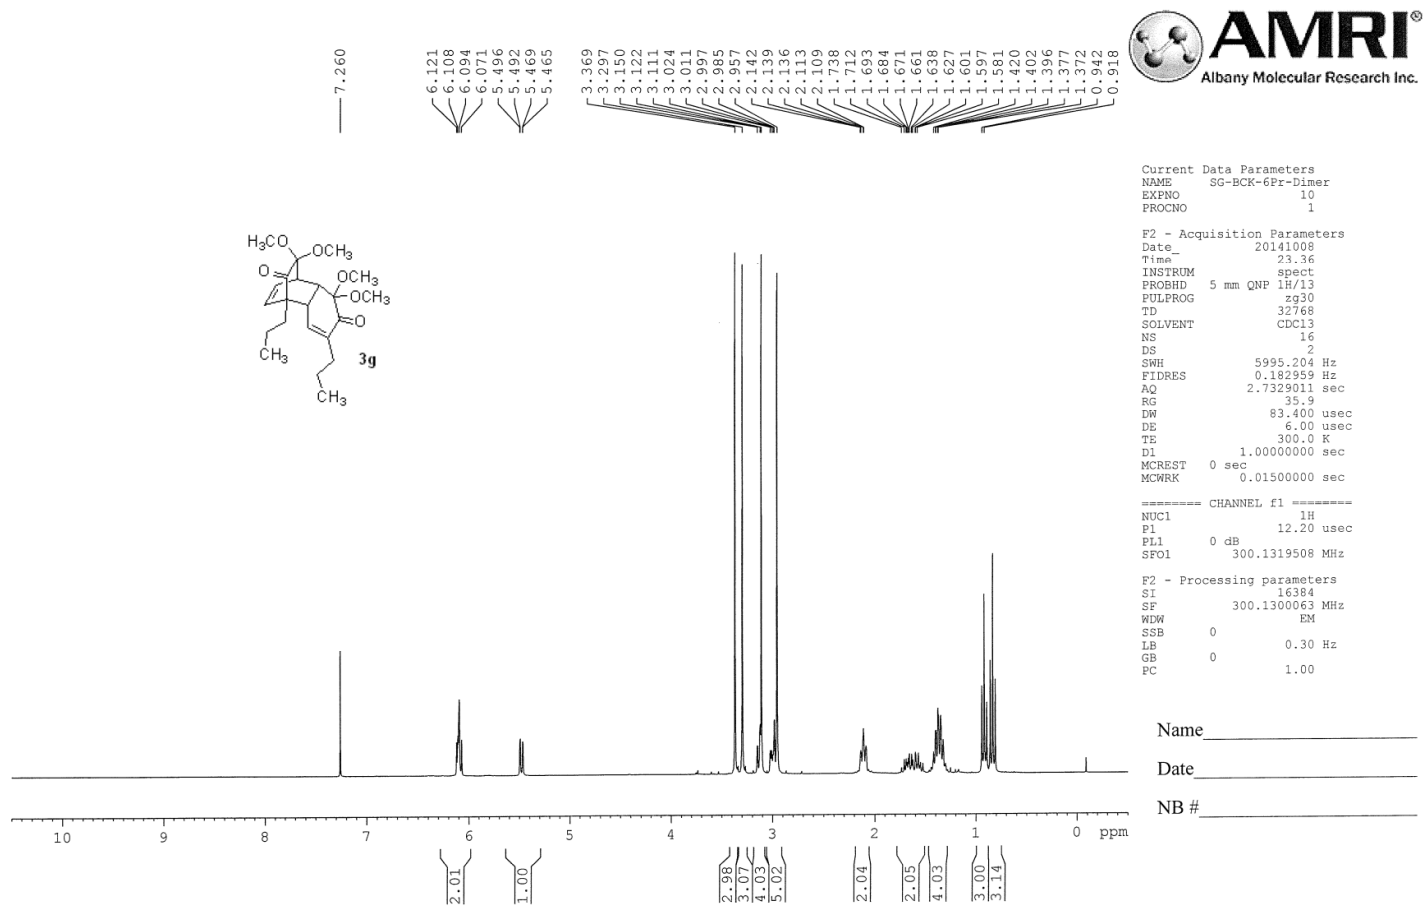

# AMRI; SRC location; 15

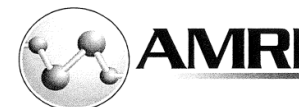

— 203.813  
— 194.594

— 141.135  
— 138.398  
— 133.020  
— 130.970

— 98.569  
— 94.759

77.425  
77.199  
77.000  
76.575

57.678  
50.265  
49.937  
49.445  
48.675  
40.806  
39.479  
39.218  
32.062  
31.728

21.514  
17.730  
14.687  
13.596

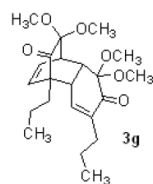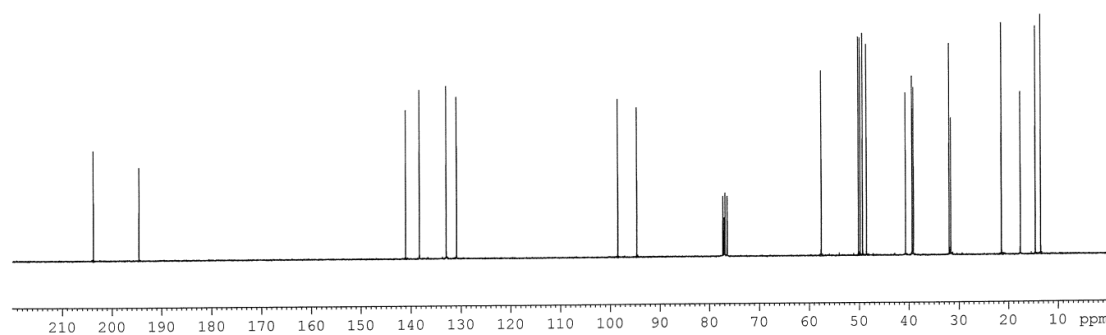

Name \_\_\_\_\_  
Date \_\_\_\_\_  
NB # \_\_\_\_\_

Current Data Parameters  
NAME SG-BCK-6Pr-Dimer  
EXPNO 11  
PROCNO 1  
  
F2 - Acquisition Parameters  
Date\_ 20141009  
Time 0.43  
INSTRUM spect  
PROBHD 5 mm QNP 1H/13  
PULPROG zgpg30  
TD 65536  
SOLVENT CDCl3  
NS 2000  
DS 0  
SWH 22675.736 Hz  
FIDRES 0.346004 Hz  
AQ 1.4451188 sec  
RG 1625.5  
DW 22.050 usec  
DE 6.00 usec  
TE 300.0 K  
D1 0.50000000 sec  
d11 0.03000000 sec  
DELTA 0.40000001 sec  
MCREST 0 sec  
MCWRK 0.01500000 sec

===== CHANNEL f1 =====  
NUC1 13C  
P1 8.00 usec  
PL1 -2.00 dB  
SFO1 75.4767751 MHz

===== CHANNEL f2 =====  
CPDPRG2 waltz16  
NUC2 1H  
PCPD2 80.00 usec  
PL2 0 dB  
PL12 16.33 dB  
PL13 16.00 dB  
SFO2 300.1315007 MHz

F2 - Processing parameters  
SI 131072  
SF 75.4677575 MHz  
WDW EM  
SSB 0  
LB 0.30 Hz  
GB 0  
PC 1.40

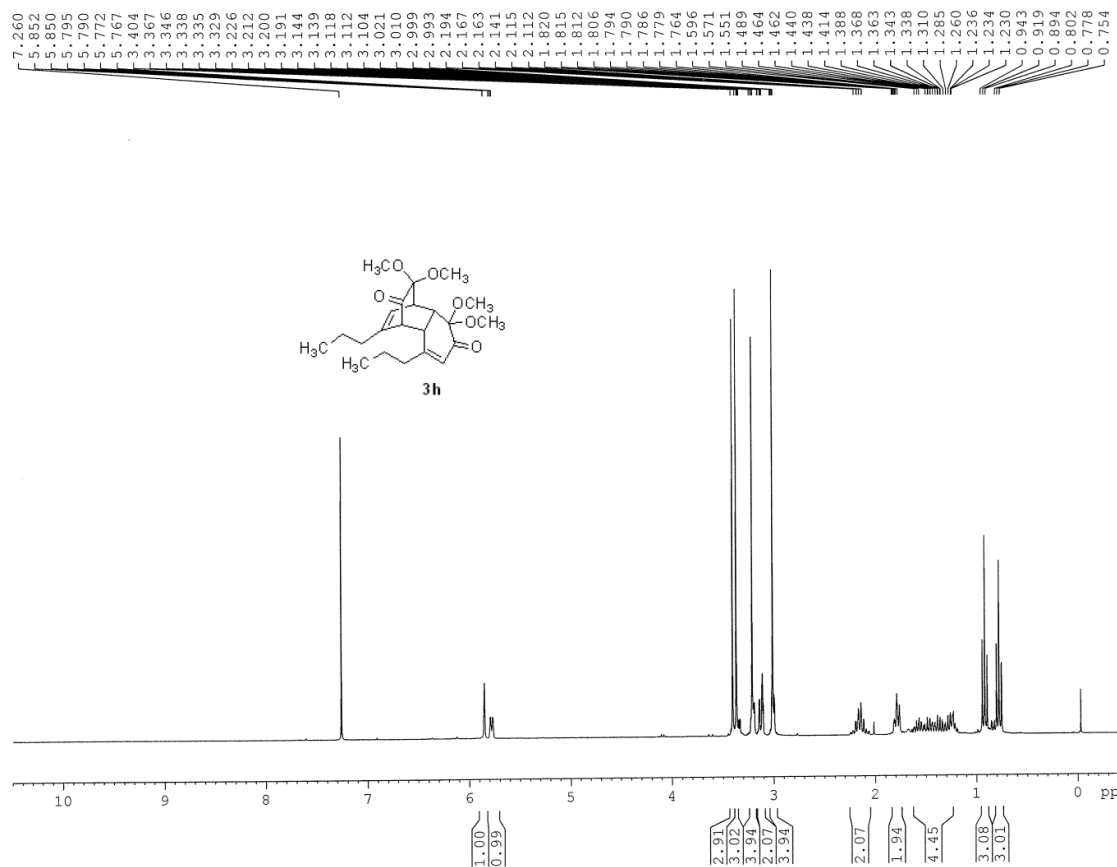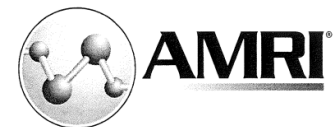

Current Data Parameters  
 NAME SG-BCK-G-5-nFr-Dimer  
 EXPNO 10  
 PROCNO 1

F2 - Acquisition Parameters  
 Date\_ 20141014  
 Time 20.09  
 INSTRUM spect  
 PROBHD 5 mm QNP 1H/13  
 PULPROG zg30  
 TD 32768  
 SOLVENT CDCl<sub>3</sub>  
 NS 16  
 DS 2  
 SWH 5995.204 Hz  
 FIDRES 0.182959 Hz  
 AQ 2.7329011 sec  
 RG 181  
 DW 83.400 usec  
 DE 6.00 usec  
 TE 300.0 K  
 D1 1.00000000 sec  
 MCREST 0 sec  
 MCWRK 0.01500000 sec

===== CHANNEL f1 =====  
 NUC1 1H  
 P1 12.20 usec  
 PL1 0 dB  
 SFO1 300.1319508 MHz

F2 - Processing parameters  
 SI 16384  
 SF 300.1300063 MHz  
 WDW EM  
 SSB 0  
 LB 0.30 Hz  
 GB 0  
 PC 1.00

Name \_\_\_\_\_

Date \_\_\_\_\_

NB # \_\_\_\_\_

# AMRI; SRC location; 15

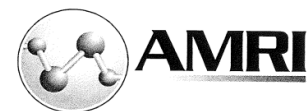

202.559

193.272

160.105

141.234

125.137  
124.093

98.805  
94.927

77.424  
77.202  
77.001  
76.576

56.913  
50.496  
49.899  
49.494  
48.827  
41.554  
39.553  
38.384  
37.225  
36.942

20.903  
19.485  
13.424  
13.304

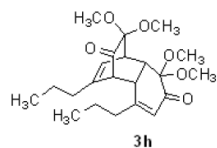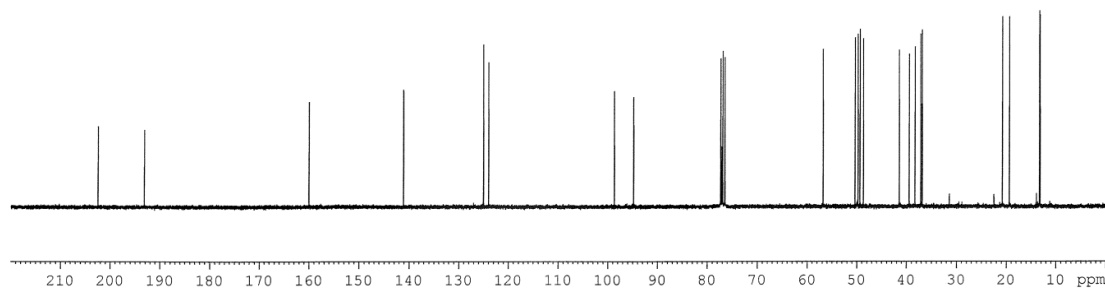

Name \_\_\_\_\_  
Date \_\_\_\_\_  
NB # \_\_\_\_\_

Current Data Parameters  
NAME SG-BCK-G-5-nPr-Dimer  
EXPNO 11  
PROCNO 1

F2 - Acquisition Parameters  
Date 20141014  
Time 21.34  
INSTRUM spect  
PROBHD 5 mm QNP 1H/13  
PULPROG zgpg30  
TD 65536  
SOLVENT CDC13  
NS 2500  
DS 0  
SWH 22675.736 Hz  
FIDRES 0.346004 Hz  
AQ 1.4451188 sec  
RG 13004  
DW 22.050 usec  
DE 6.00 usec  
TE 300.0 K  
D1 0.50000000 sec  
d11 0.03000000 sec  
DELTA 0.40000001 sec  
MCREST 0 sec  
MCWRK 0.01500000 sec

===== CHANNEL f1 =====  
NUC1 13C  
P1 8.00 usec  
PL1 -2.00 dB  
SFO1 75.4767751 MHz

===== CHANNEL f2 =====  
CPDPRG2 waltz16  
NUC2 1H  
PCPD2 80.00 usec  
PL2 0 dB  
PL12 16.33 dB  
PL13 16.00 dB  
SFO2 300.1315007 MHz

F2 - Processing parameters  
SI 131072  
SF 75.4677514 MHz  
WDW EM  
SSB 0  
LB 0.30 Hz  
GB 0  
PC 1.40

AMRI SRC  
location; 17

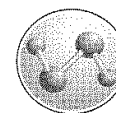

**AMRI**  
Pulse Program

7.356  
7.346  
7.260  
6.195  
6.175  
6.157  
6.001  
5.980  
5.243  
4.987  
3.769  
3.759  
3.749  
3.739  
3.706  
3.675  
3.669  
3.631  
3.603  
3.597  
3.581  
3.554  
3.548  
3.527  
3.514  
3.499  
3.487  
3.456  
3.437  
3.355  
3.261  
3.241  
3.172  
3.079  
3.062  
3.045  
1.279  
1.172  
0.752  
0.706

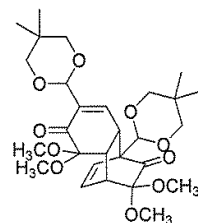

3i

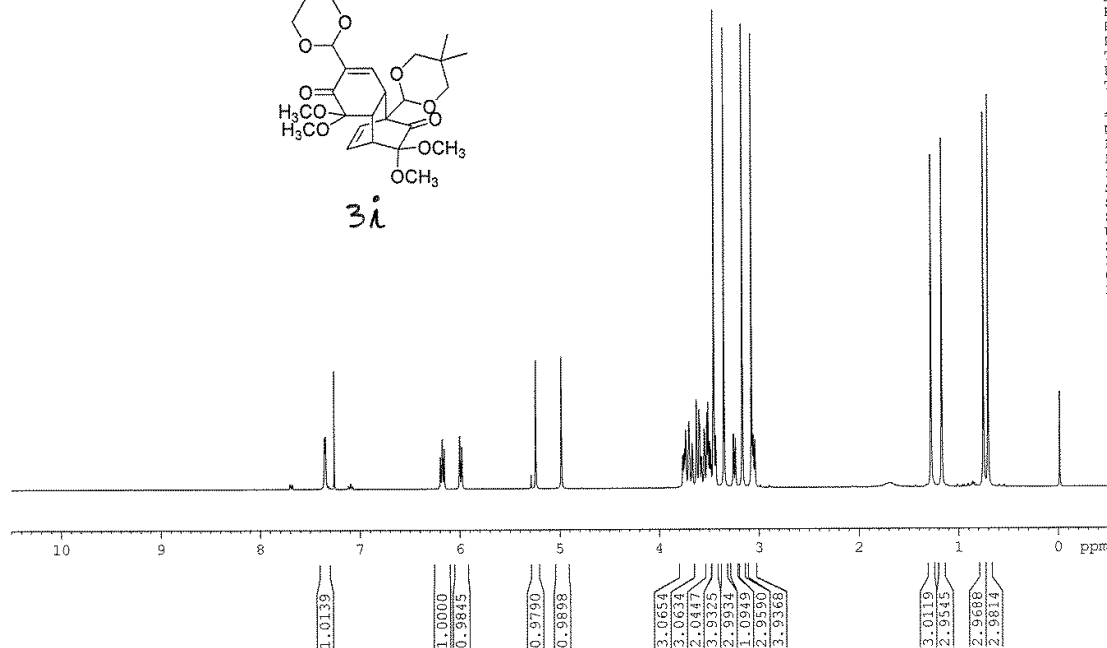

NAME SG-SIR-6-KETAL-2-OMe-DIM  
EXPNO 10  
PROCNO 1  
Date\_ 20140725  
Time\_ 20.07  
INSTRUM spect  
PROBHD 5 mm PABBO BB-  
PULPROG zg30  
TD 65536  
SOLVENT CDCl3  
NS 16  
DS 2  
SWH 8012.820 Hz  
FIDRES 0.122266 Hz  
AQ 4.0894966 sec  
RG 57  
DW 62.400 usec  
DE 6.50 usec  
TE 300.0 K  
D1 1.00000000 sec  
TD0 1

===== CHANNEL f1 =====  
NUC1 1H  
P1 10.70 usec  
PL1 -3.00 dB  
PL1W 19.34582710 W  
SFO1 400.1318542 MHz  
SI 32768  
SF 400.1300094 MHz  
WDW EM  
SSB 0  
LB 0.30 Hz  
GB 0  
PC 1.00

# AMRI SRC location; 17

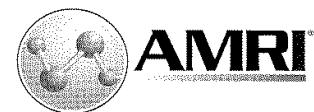

Name \_\_\_\_\_  
Date \_\_\_\_\_  
NB # \_\_\_\_\_

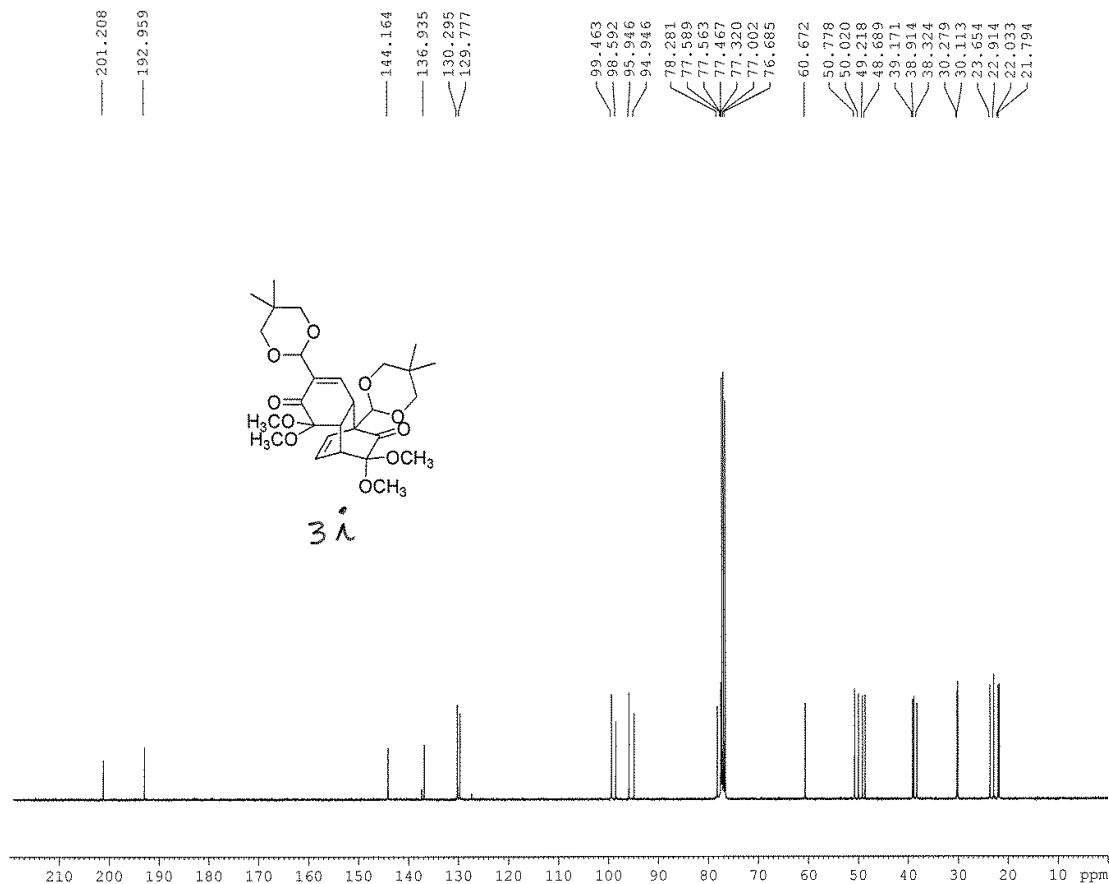

NAME SG-SIR-6-KETAL-2-OMe-DIM  
EXRNO 11  
PROCNO 1  
Date 20140726  
Time 0.57  
INSTRUM spect  
PROBHD 5 mm PABBO BB-  
PULPROG zgpg30  
TD 65536  
SOLVENT CDCl3  
NS 5000  
DS 4  
SWH 23980.814 Hz  
FIDRES 0.365918 Hz  
AQ 1.3664756 sec  
RG 18390.4  
DW 20.850 usec  
DE 6.50 usec  
TE 300.0 K  
D1 2.00000000 sec  
D11 0.03000000 sec  
TD0 1

===== CHANNEL f1 =====  
NUC1 13C  
P1 7.10 usec  
PL1 -4.00 dB  
PL1W 82.02445221 W  
SFO1 100.6228298 MHz

===== CHANNEL f2 =====  
CPDPRG2 waltz16  
NUC2 1H  
PCPD2 80.00 usec  
PL2 -3.00 dB  
PL12 14.47 dB  
PL13 15.06 dB  
PL2W 19.34582710 W  
PL12W 0.34640750 W  
PL13W 0.30240381 W  
SFO2 400.1316005 MHz  
SI 32768  
SF 100.6127717 MHz  
WDW EM  
SSB 0  
LB 1.00 Hz  
GB 0  
PC 1.40

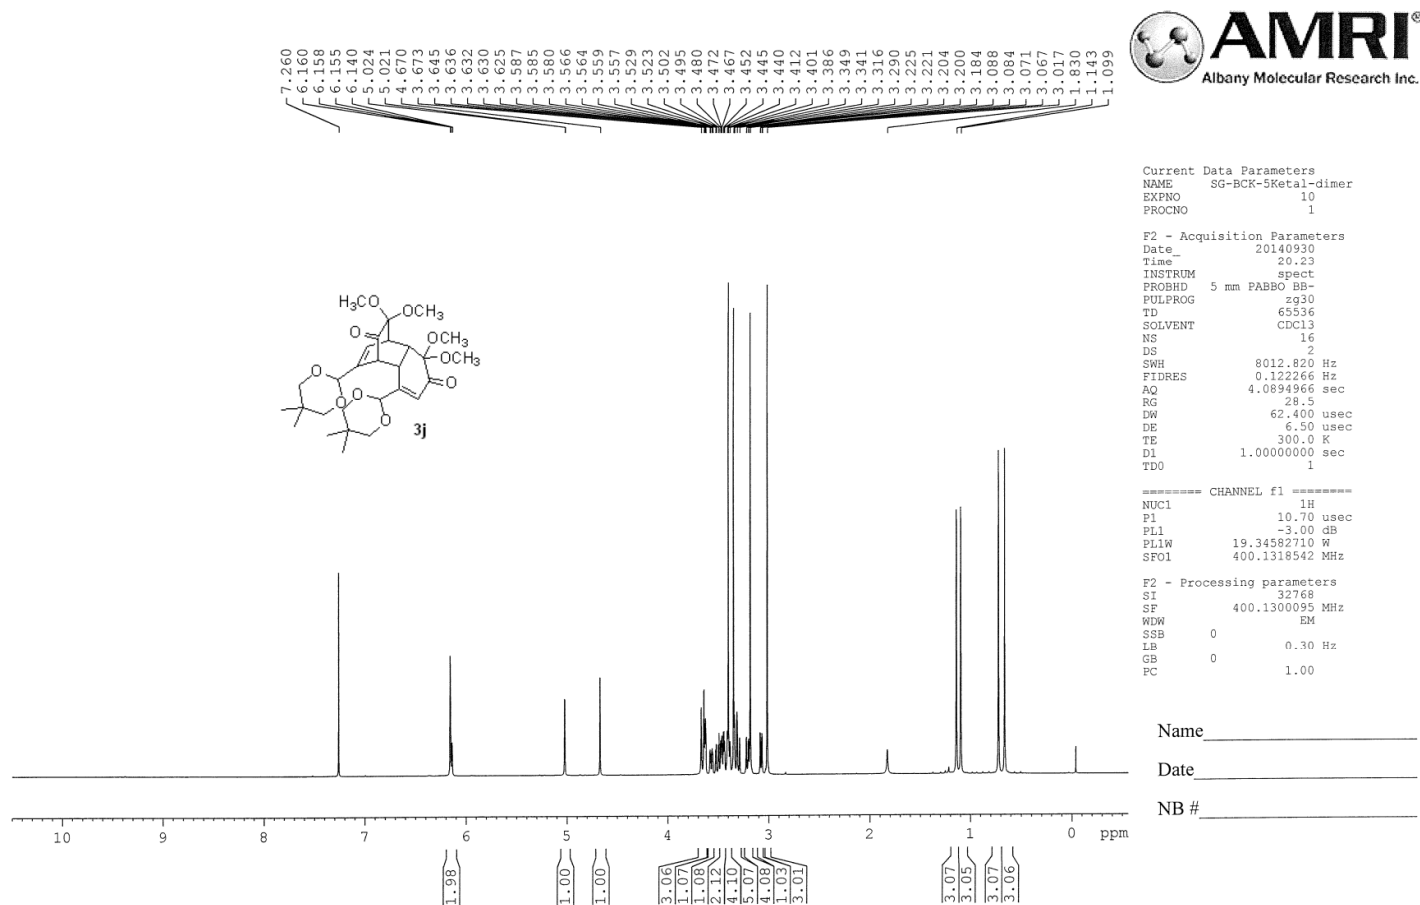

# AMRI SRC location; 17

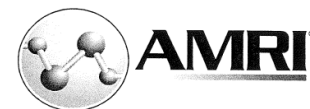

— 202.117  
— 194.069

— 153.686  
— 137.865  
— 128.207  
— 125.776

99.068  
98.632  
98.556  
94.761  
77.793  
77.319  
77.282  
77.202  
77.001  
76.685  
76.652

51.974  
50.464  
50.100  
49.753  
48.791  
39.372  
38.148  
37.611  
30.206  
30.023  
22.997  
22.872  
21.720

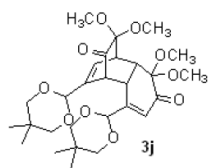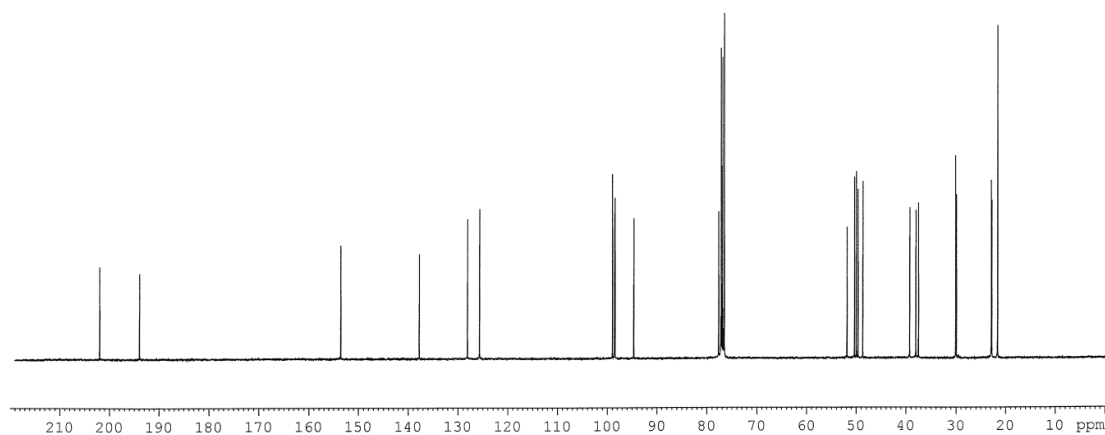

Name \_\_\_\_\_  
Date \_\_\_\_\_  
NB # \_\_\_\_\_

Current Data Parameters  
NAME SG-BCK-5Ketal-dimer  
EXPNO 11  
PROCNO 1

F2 - Acquisition Parameters  
Date\_ 20140930  
Time 22.20  
INSTRUM spect  
PROBHD 5 mm PABBO BB-  
PULPROG zgpg30  
TD 65536  
SOLVENT CDCl3  
NS 2000  
DS 4  
SWH 23980.814 Hz  
FIDRES 0.365918 Hz  
AQ 1.3664756 sec  
RG 13004  
DW 20.850 usec  
DE 6.50 usec  
TE 300.0 K  
D1 2.00000000 sec  
D11 0.03000000 sec  
TD0 1

===== CHANNEL f1 =====  
NUC1 13C  
P1 7.10 usec  
PL1 -4.00 dB  
PL1W 82.02445221 W  
SF01 100.6228298 MHz

===== CHANNEL f2 =====  
CPDPRG2 waltz16  
NUC2 1H  
PCPD2 80.00 usec  
PL2 -3.00 dB  
PL12 14.47 dB  
PL13 15.06 dB  
PL2W 19.34582710 W  
PL12W 0.34640750 W  
PL13W 0.30240381 W  
SF02 400.1316005 MHz

F2 - Processing parameters  
SI 32768  
SF 100.6127756 MHz  
WDW EM  
SSB 0  
LB 1.00 Hz  
GB 0  
PC 1.40

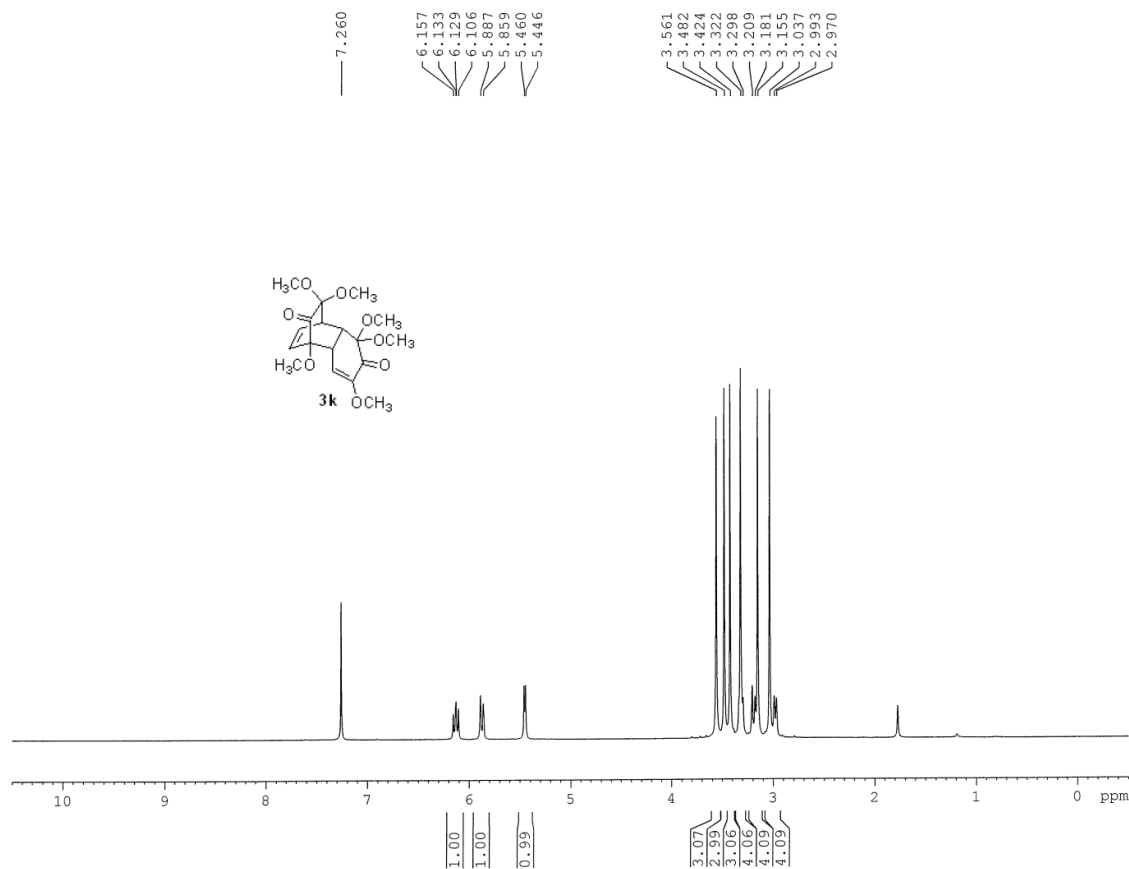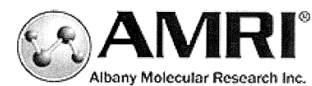

Current Data Parameters  
 NAME SG-BCK-6OMe-Dimer  
 EXPNO 10  
 PROCNO 1

F2 - Acquisition Parameters  
 Date 20141006  
 Time 20.09  
 INSTRUM spect  
 PROBHD 5 mm QNP 1H/13  
 PULPROG zg30  
 TD 32768  
 SOLVENT CDCl3  
 NS 16  
 DS 2  
 SWH 5995.204 Hz  
 FIDRES 0.182959 Hz  
 AQ 2.7329011 sec  
 RG 71.8  
 DW 83.400 usec  
 DE 6.00 usec  
 TE 300.0 K  
 D1 1.00000000 sec  
 MCREST 0 sec  
 MCWRK 0.01500000 sec

===== CHANNEL f1 =====  
 NUC1 1H  
 P1 12.20 usec  
 PL1 0 dB  
 SFO1 300.1319508 MHz

F2 - Processing parameters  
 SI 16384  
 SF 300.1300067 MHz  
 WDW EM  
 SSB 0  
 LA 0.30 Hz  
 GB 0  
 PC 1.00

Name \_\_\_\_\_

Date \_\_\_\_\_

NB # \_\_\_\_\_

# AMRI; SRC location; 15

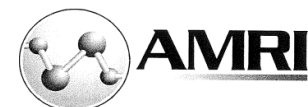

Name \_\_\_\_\_  
Date \_\_\_\_\_  
NB # \_\_\_\_\_

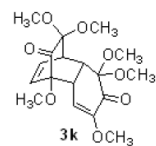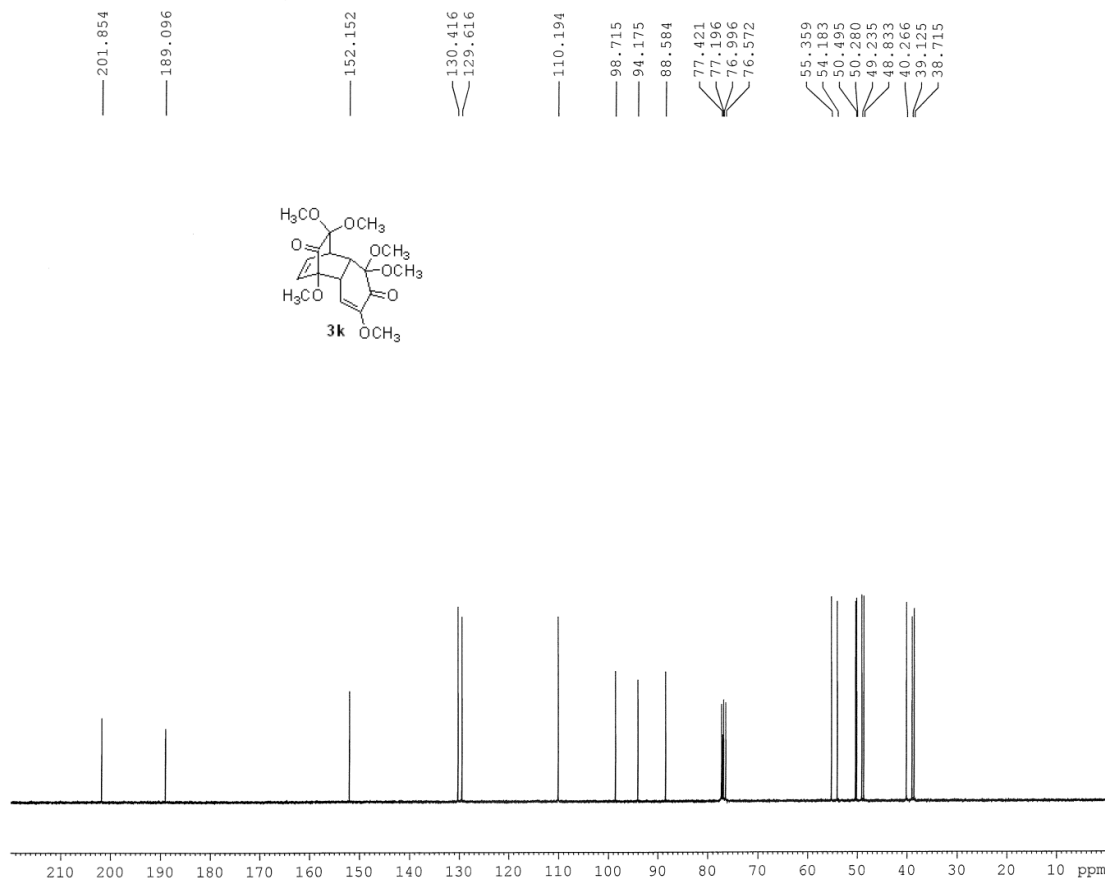

Current Data Parameters  
NAME SG-BCK-6OMe-Dimer  
EXPNO 11  
PROCNO 1

F2 - Acquisition Parameters  
Date 20141008  
Time 21.17  
INSTRUM spect  
PROBHD 5 mm QNP 1H/13  
PULPROG zgpg30  
TD 65536  
SOLVENT CDCl3  
NS 2000  
DS 0  
SWH 22675.736 Hz  
FIDRES 0.346004 Hz  
AQ 1.4451188 sec  
RG 2298.8  
DW 22.050 usec  
DE 6.00 usec  
TE 300.0 K  
D1 0.50000000 sec  
d11 0.03000000 sec  
DELTA 0.40000001 sec  
MCREST 0 sec  
MCWRK 0.01500000 sec

===== CHANNEL f1 =====  
NUC1 13C  
P1 8.00 usec  
PL1 -2.00 dB  
SFO1 75.4767751 MHz

===== CHANNEL f2 =====  
CPDPRG2 waltz16  
NUC2 1H  
PCPD2 80.00 usec  
PL2 0 dB  
PL12 16.33 dB  
PL13 16.00 dB  
SFO2 300.1315007 MHz

F2 - Processing parameters  
S1 131072  
SF 75.4677560 MHz  
WDW EM  
SSB 0  
LB 0.30 Hz  
GB 0  
PC 1.40

AMRI SRC  
location; 17

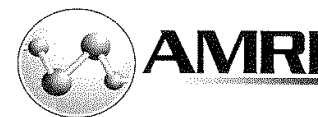

7.264  
6.916  
6.896  
6.796  
6.776  
6.653  
6.647  
6.639  
6.634  
6.629  
6.621  
6.616  
6.607  
6.602  
6.588  
6.584  
4.652  
4.646  
4.637  
4.632  
4.285  
4.280  
4.271  
4.266  
3.898  
3.407  
3.257

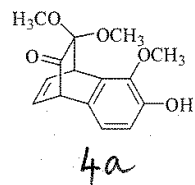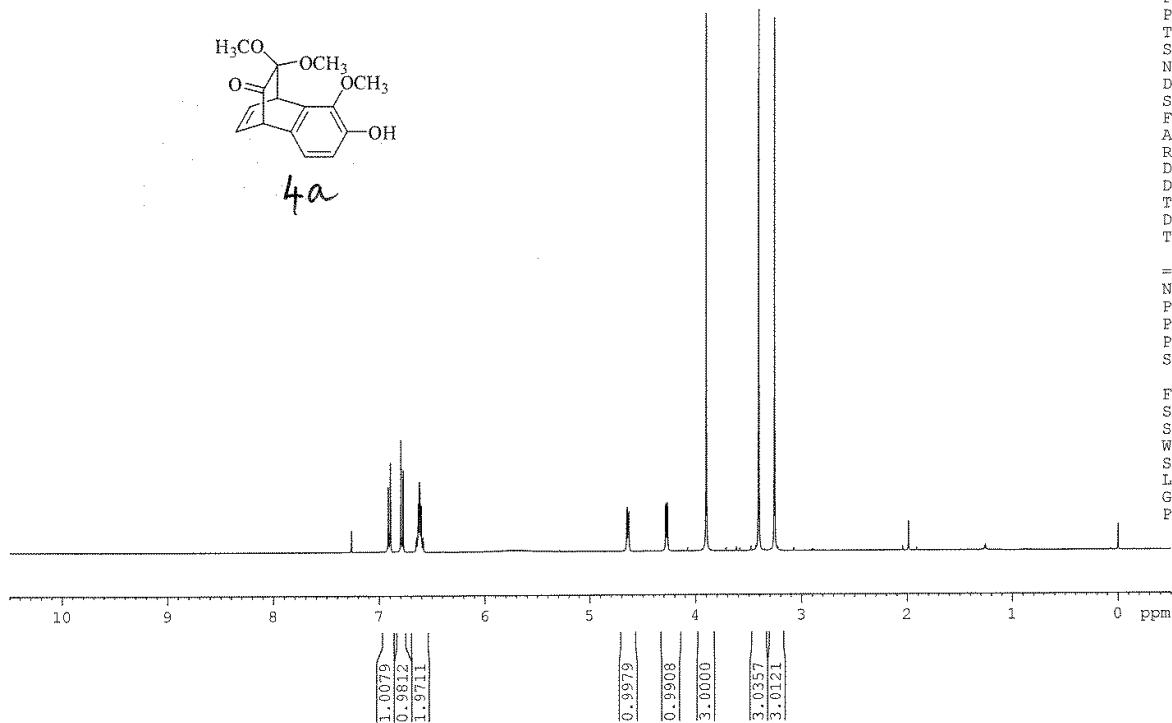

Current Data Parameters  
NAME SG-SIR-6-GD  
EXPNO 10  
PROCNO 1

F2 - Acquisition Parameters  
Date\_ 20131003  
Time 2.27  
INSTRUM spect  
PROBHD 5 mm PABBO BB-  
PULPROG zg30  
TD 65536  
SOLVENT CDCl3  
NS 16  
DS 2  
SWH 8012.820 Hz  
FIDRES 0.122266 Hz  
AQ 4.0894966 sec  
RG 40.3  
DW 62.400 usec  
DE 6.50 usec  
TE 300.0 K  
D1 1.00000000 sec  
TD0 1

===== CHANNEL f1 =====  
NUC1 1H  
P1 10.50 usec  
PL1 -3.00 dB  
PL1W 19.34582710 W  
SFO1 400.1318542 MHz

F2 - Processing parameters  
SI 32768  
SF 400.1300077 MHz  
WDW EM  
SSB 0  
LB 0.30 Hz  
GB 0  
PC 1.00

# AMRI SRC location; 17

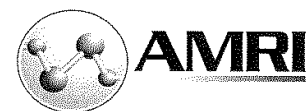

195.795

148.298  
143.528

133.309  
131.627  
131.065  
128.811  
121.065  
114.059

91.763

77.319  
77.001  
76.882

62.409  
56.797  
50.378  
49.961  
42.169

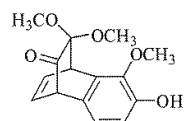

4a

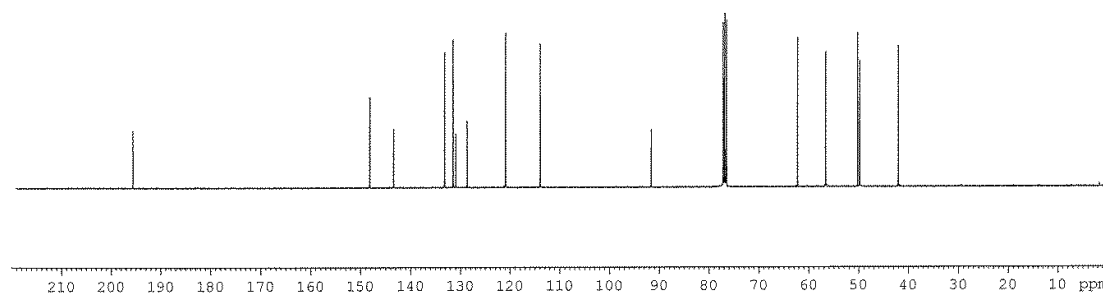

Current Data Parameters  
NAME SG-SIR-6-GD  
EXPNO 11  
PROCNO 1

F2 - Acquisition Parameters  
Date 20131003  
Time 5.21  
INSTRUM spect  
PROBHD 5 mm PABBO SB-  
PULPROG zgpg30  
TD 65536  
SOLVENT CDCl3  
NS 3000  
DS 4  
SWH 23980.814 Hz  
FIDRES 0.365918 Hz  
AQ 1.3664756 sec  
RG 6502  
DW 20.850 usec  
DE 6.50 usec  
TE 300.0 K  
D1 2.00000000 sec  
D11 0.03000000 sec  
TD0 1

CHANNEL f1  
NUC1 13C  
P1 7.10 usec  
PL1 -4.00 dB  
PL1W 82.02445221 W  
SFO1 100.6228298 MHz

CHANNEL f2  
CPDPRG2 waltz16  
NUC2 1H  
PCPD2 80.00 usec  
PL2 -3.00 dB  
PL12 14.64 dB  
PL13 15.06 dB  
PL2W 19.34582710 W  
PL12W 8.33310971 W  
PL13W 0.30240381 W  
SFO2 400.1316005 MHz

F2 - Processing parameters  
SI 32768  
SF 100.6127754 MHz  
WDW EM  
SSB 0  
LB 1.00 Hz  
GB 0  
PC 1.40

7.260  
7.045  
6.682  
6.675  
6.659  
6.652  
5.703  
4.759  
4.752  
4.612  
4.589  
3.874  
3.409  
3.269

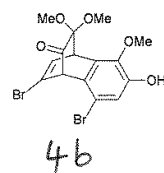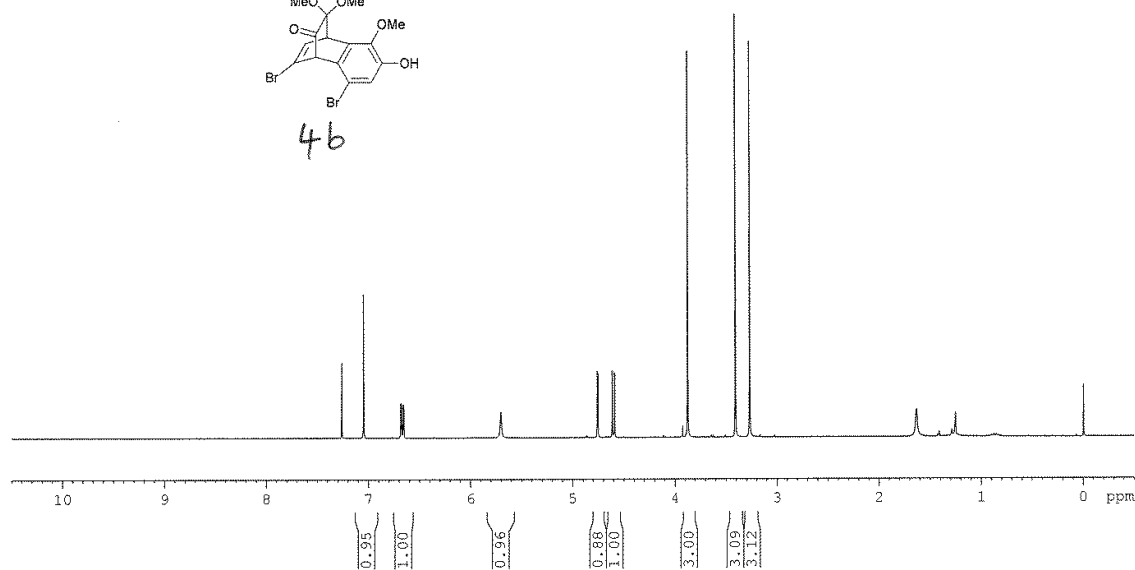

NAME SG-BCK-5Br-Dimer-Ar  
EXPNO 30  
PROCNO 1  
Date\_ 20140823  
Time 12.18  
INSTRUM spect  
PROBHD 5 mm QNP 1H/13  
PULPROG zg30  
TD 32768  
SOLVENT CDCl3  
NS 16  
DS 2  
SWH 5995.204 Hz  
FIDRES 0.182959 Hz  
AQ 2.7329011 sec  
RG 512  
DW 83.400 usec  
DE 6.00 usec  
TE 300.0 K  
D1 1.00000000 sec  
MCREST 0.00000000 sec  
MCWRK 0.01500000 sec

===== CHANNEL f1 =====  
NUC1 1H  
P1 12.20 usec  
PL1 0.00 dB  
SFO1 300.1319508 MHz  
SI 16384  
SF 300.1300063 MHz  
WDW EM  
SSB 0  
LB 0.30 Hz  
GB 0  
PC 1.00

Name \_\_\_\_\_

Date \_\_\_\_\_

NB # \_\_\_\_\_

AMRI; SRC  
location; 15

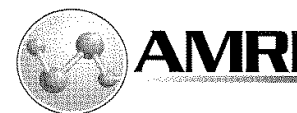

Name \_\_\_\_\_  
Date \_\_\_\_\_  
NB # \_\_\_\_\_

192.589  
149.483  
143.073  
131.834  
131.818  
127.484  
122.953  
118.124  
114.764  
91.077  
77.423  
77.000  
76.576  
64.609  
62.600  
50.637  
50.194  
44.195

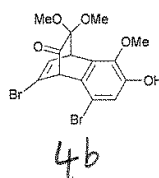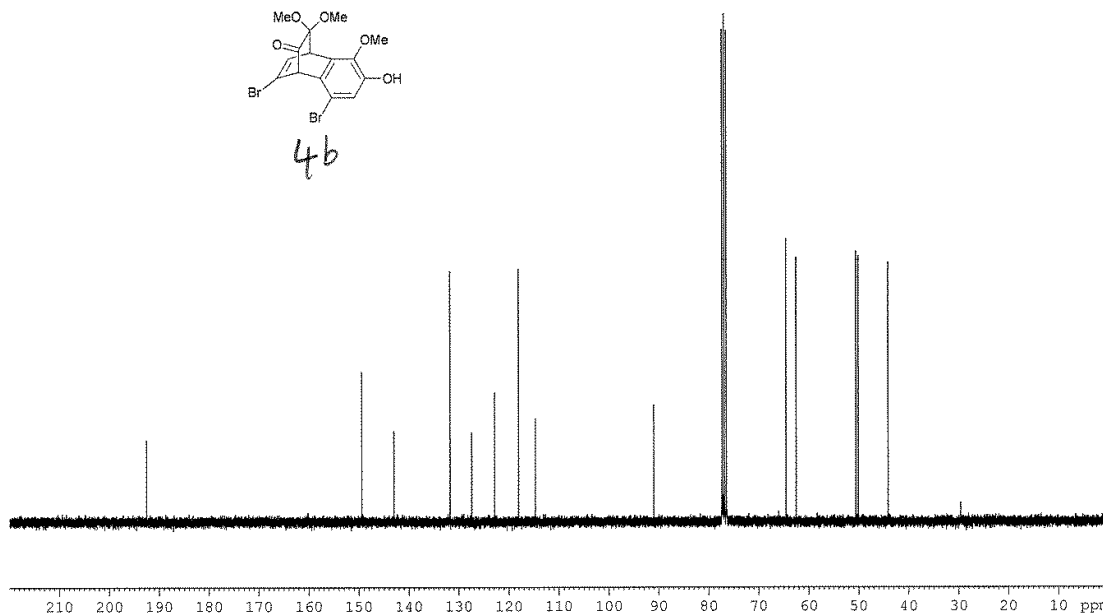

NAME SG-BCK-5Br-Dimer-Ar  
EXPNO 31  
PROCNO 1  
Date\_ 20140823  
Time\_ 14.00  
INSTRUM spect  
PROBHD 5 mm QNP 1H/13  
PULPROG zgpg30  
TD 65536  
SOLVENT CDC13  
NS 3000  
DS 0  
SWH 22675.736 Hz  
FIDRES 0.346004 Hz  
AQ 1.4451188 sec  
RG 1824.6  
DW 22.050 usec  
DE 6.00 usec  
TE 300.0 K  
D1 0.50000000 sec  
d11 0.03000000 sec  
DELTA 0.40000001 sec  
MCREST 0.00000000 sec  
MCWRR 0.01500000 sec

===== CHANNEL f1 =====  
NUC1 13C  
P1 8.00 usec  
PL1 -2.00 dB  
SFO1 75.4767751 MHz

===== CHANNEL f2 =====  
CPDPRG2 waltz16  
NUC2 1H  
PCPD2 80.00 usec  
PL2 0.00 dB  
PL12 16.33 dB  
PL13 16.00 dB  
SFO2 300.1315007 MHz  
SI 131072  
SF 75.4677500 MHz  
WDW EM  
SSB 0  
LB 0.30 Hz  
GB 0  
PC 1.40

AMRI SRC  
location; 17

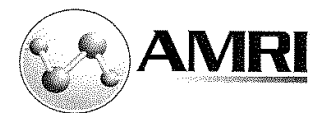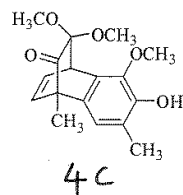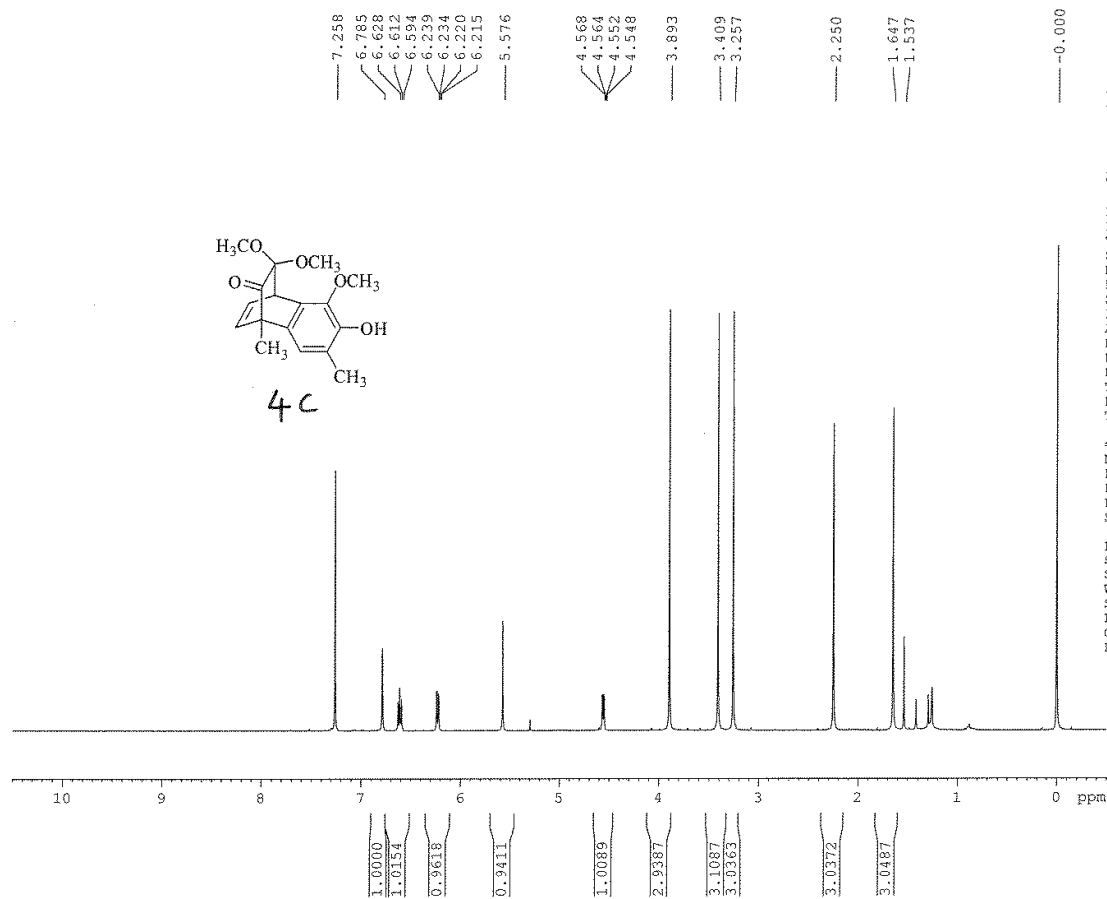

Current Data Parameters  
NAME SG-SIR-6-OMe-2-Me-SPOT-2  
EXPNO 10  
PROCNO 1

F2 - Acquisition Parameters  
Date\_ 20131001  
Time 12.45  
INSTRUM spect  
PROBHD 5 mm PABBO BB-  
PULPROG zg30  
TD 65536  
SOLVENT CDCl3  
NS 16  
DS 2  
SWH 8012.820 Hz  
FIDRES 0.122266 Hz  
AQ 4.0894966 sec  
RG 322.5  
DW 62.400 usec  
DE 6.50 usec  
TE 300.0 K  
D1 1.00000000 sec  
TDO 1

===== CHANNEL f1 =====  
NUC1 1H  
P1 10.50 usec  
PL1 -3.00 dB  
PL1W 19.34582710 W  
SFO1 400.1318542 MHz

F2 - Processing parameters  
SI 32768  
SF 400.1300101 MHz  
WDW EM  
SSB 0  
LB 0.30 Hz  
GB 0  
PC 1.00

AMRI; SRC AV400  
location; 18

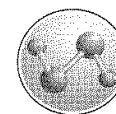

**AMRI**  
CORPORATION

Name \_\_\_\_\_  
Date \_\_\_\_\_  
NB # \_\_\_\_\_

NAME SG-SIR-7-6Me-2OMe-D  
EXPNO 11  
PROCNO 1  
Date\_ 20131004  
Time 0.30  
INSTRUM spect  
PROBHD 5 mm PABBO BB-  
PULPROG zgpg30  
TD 65536  
SOLVENT CDCl3  
NS 2000  
DS 4  
SWH 24038.461 Hz  
FIDRES 0.366798 Hz  
AQ 1.3631988 sec  
RG 128  
DW 20.800 usec  
DE 6.50 usec  
TE 300.0 K  
D1 0.50000000 sec  
D11 0.03000000 sec  
TDO 1

===== CHANNEL f1 =====  
NUC1 13C  
P1 8.50 usec  
PL1 -1.00 dB  
PL1W 44.56811569 W  
SFO1 100.6479769 MHz

===== CHANNEL f2 =====  
CPDPRG2 waltz16  
NUC2 1H  
PCPD2 80.00 usec  
PL2 -2.00 dB  
PL12 15.56 dB  
PL13 15.72 dB  
PL2W 14.33185768 W  
PL12W 0.25136364 W  
PL13W 0.24227159 W  
SFO2 400.2316009 MHz  
SI 32768  
SF 100.6379224 MHz  
WDW EM  
SSB 0  
LB 1.00 Hz  
GB 0  
PC 1.40

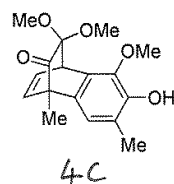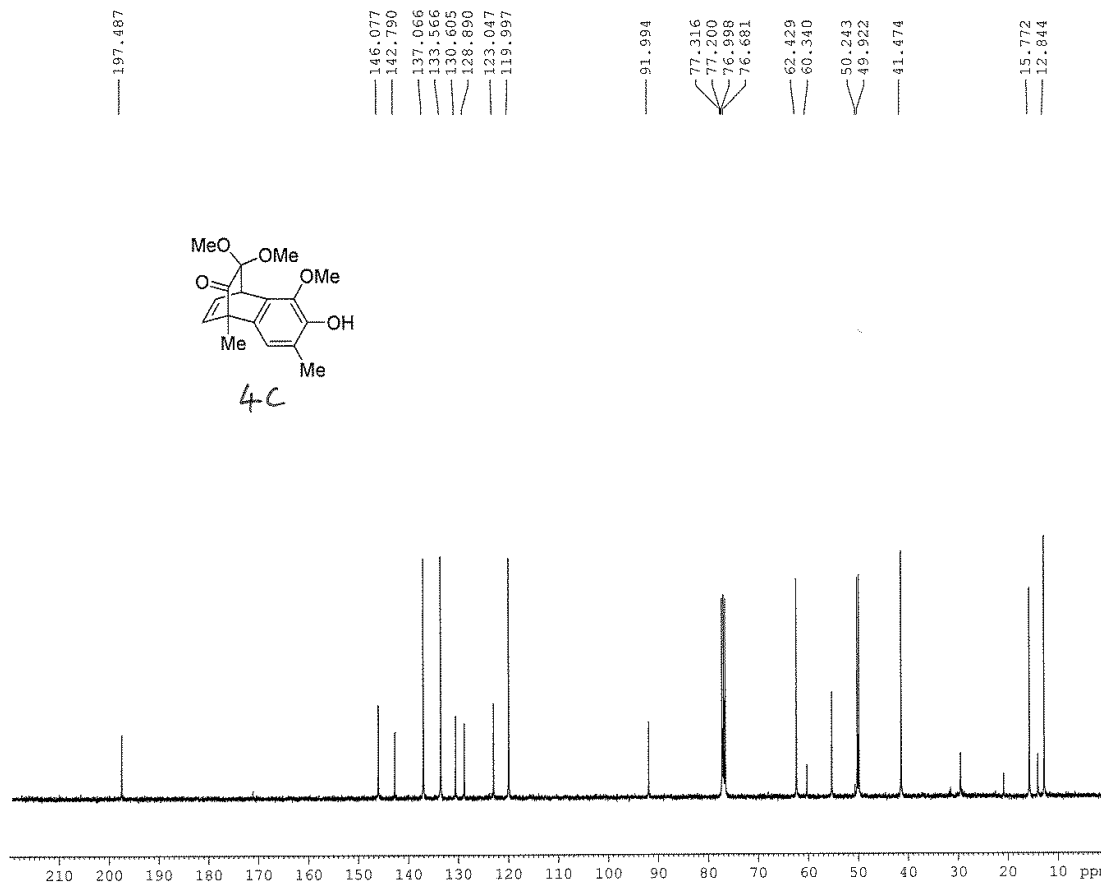

AMRI; SRC AV400  
location; 18

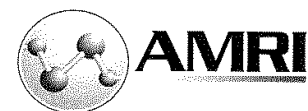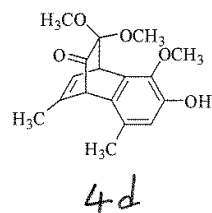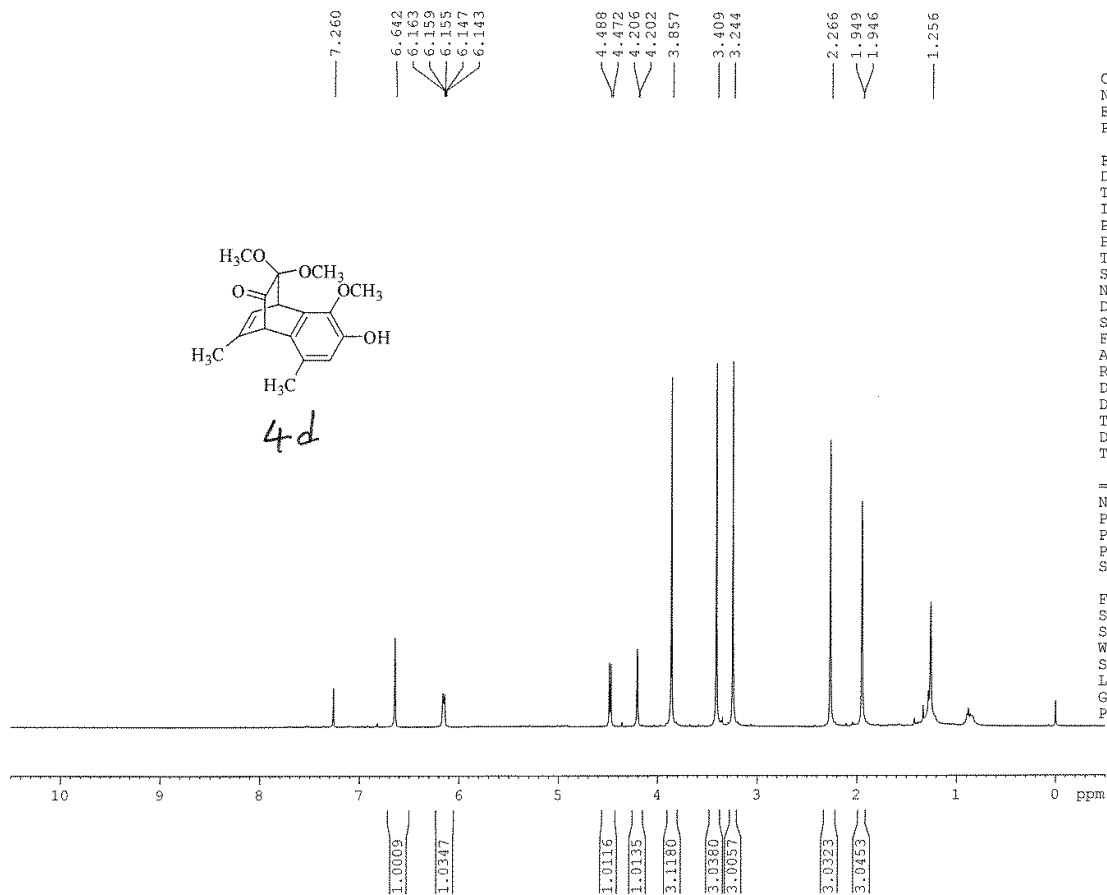

Current Data Parameters  
NAME SG-SIR-10-5Me-20Me-D  
EXPNO 10  
PROCNO 1

F2 - Acquisition Parameters  
Date\_ 20131004  
Time 18.36  
INSTRUM spect  
PROBHD 5 mm PABBO BB-  
PULPROG zg30  
TD 65536  
SOLVENT CDCl3  
NS 16  
DS 2  
SWH 8012.820 Hz  
FIDRES 0.122266 Hz  
AQ 4.0894966 sec  
RG 50.8  
DW 62.400 usec  
DE 6.00 usec  
TE 300.1 K  
D1 1.00000000 sec  
TD0 1

===== CHANNEL f1 =====  
NUC1 1H  
P1 10.60 usec  
PL1 -2.00 dB  
PL1W 14.33185768 W  
SFO1 400.2330885 MHz

F2 - Processing parameters  
SI 32768  
SF 400.2300120 MHz  
WDW EM  
SSB 0  
LB 0.30 Hz  
GB 0  
PC 1.00

AMRI; SRC AV400  
location; 18

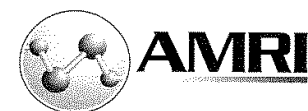

196.426

147.571  
141.889  
141.390  
131.683  
129.714  
126.972  
125.822  
115.326

92.145  
77.320  
77.003  
76.685

62.418  
59.022  
50.443  
49.845  
41.763

19.843  
16.047

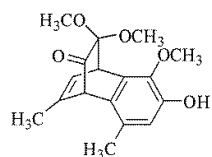

4d

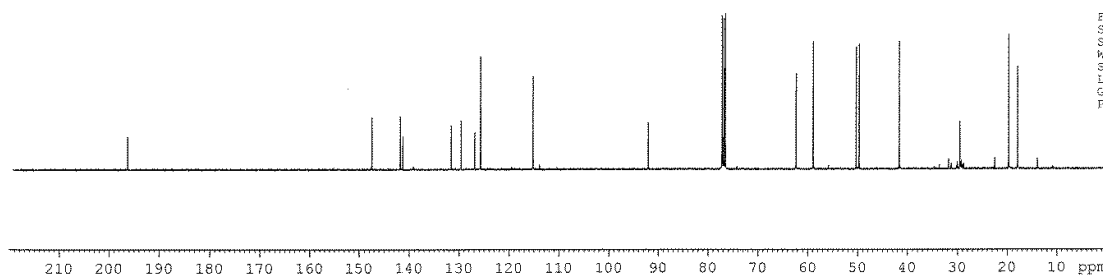

Current Data Parameters  
NAME SG-SIR-10-5Me-2OMe-D  
EXPNO 11  
PROCNO 1

F2 - Acquisition Parameters  
Date 20131004  
Time 20.14  
INSTRUM spect  
PROBHD 5 mm PABBO BB-  
PULPROG zgpg30  
TD 65536  
SOLVENT CDCl3  
NS 3000  
DS 4  
SWH 24038.461 Hz  
FIDRES 0.366798 Hz  
AQ 1.3631988 sec  
RG 144  
DW 20.800 usec  
DE 6.50 usec  
TE 300.0 K  
D1 0.50000000 sec  
D11 0.03000000 sec  
TD0 1

===== CHANNEL f1 =====  
NUC1 13C  
P1 8.50 usec  
PL1 -1.00 dB  
PL1W 44.58811569 W  
SFO1 100.6479769 MHz

===== CHANNEL f2 =====  
CPDPRG2 waltz16  
NUC2 1H  
PCPD2 80.00 usec  
PL2 -2.00 dB  
PL12 15.56 dB  
PL13 15.72 dB  
PL2W 14.33189768 W  
PL12W 0.25136364 W  
PL13W 0.24227159 W  
SFO2 400.2316009 MHz

F2 - Processing parameters  
SI 32768  
SF 100.6379189 MHz  
WDW EM  
SSB 0  
LB 1.00 Hz  
GB 0  
PC 1.40

AMRI SRC  
location; 17

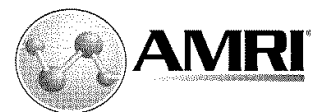

Name \_\_\_\_\_  
Date \_\_\_\_\_  
NB # \_\_\_\_\_

7.260  
6.793  
6.681  
6.665  
6.662  
6.646  
6.444  
6.440  
6.425  
6.420  
5.674  
4.561  
4.557  
4.545  
4.540  
3.883  
3.387  
3.271  
2.712  
2.694  
2.676  
2.665  
2.658  
2.647  
2.639  
2.628  
2.610  
2.592  
2.332  
2.313  
2.295  
2.277  
2.258  
2.130  
2.111  
2.094  
2.073  
2.044  
1.228  
1.210  
1.191  
1.172

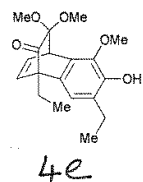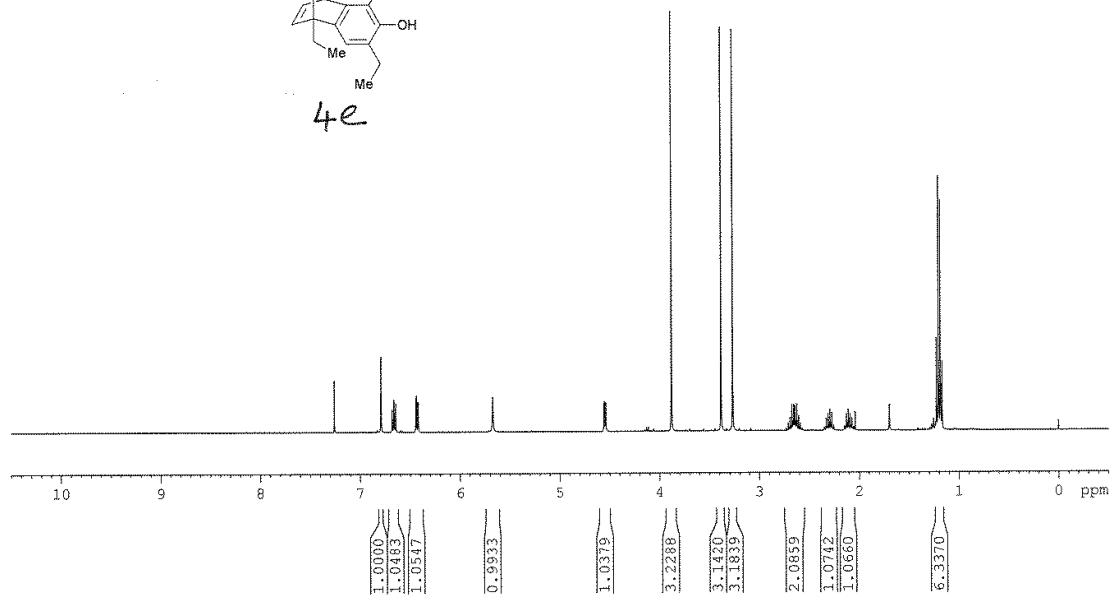

NAME SG-BCK-6Et-Dimer-ARm  
EXPNO 10  
PROCNO 1  
Date\_ 20140901  
Time\_ 20.15  
INSTRUM spect  
PROBHD 5 mm PABBO BB-  
PULPROG zg30  
TD 65536  
SOLVENT CDC13  
NS 16  
DS 2  
SWH 8012.820 Hz  
FIDRES 0.122266 Hz  
AQ 4.0894966 sec  
RG 35.9  
DW 62.400 usec  
DE 6.50 usec  
TE 300.0 K  
D1 1.00000000 sec  
TDO 1

===== CHANNEL f1 =====  
NUC1 1H  
P1 10.70 usec  
PL1 -3.00 dB  
PL1W 19.34582710 W  
SFO1 400.1318542 MHz  
SI 32768  
SF 400.1300094 MHz  
WDW EM  
SSB 0  
LB 0.30 Hz  
GB 0  
PC 1.00

# AMRI SRC location; 17

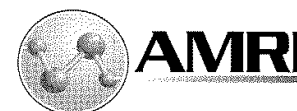

197.416

145.649  
142.899  
133.730  
133.438  
130.017  
129.348  
129.189  
119.253

92.290

77.317  
76.999  
76.861

62.517  
59.201

50.135  
50.110  
41.384

23.217  
19.032

14.000  
8.821

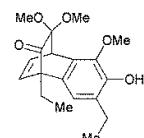

4e

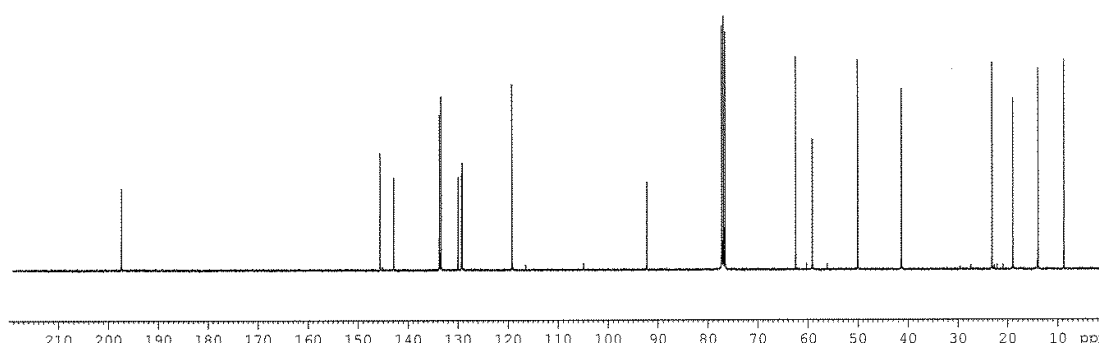

Name \_\_\_\_\_  
Date \_\_\_\_\_  
NB # \_\_\_\_\_

NAME SG-BCK-6Et-Dimer-ARM  
EXFNO 11  
PROCNO 1  
Date 20140901  
Time 22.41  
INSTRUM spect  
PROBHD 5 mm PABBO BB-  
PULPROG zgpg30  
TD 65336  
SOLVENT CDCl3  
NS 2500  
DS 4  
SWH 23980.814 Hz  
FIDRES 0.365918 Hz  
AQ 1.3664756 sec  
RG 20642.5  
DW 20.850 usec  
DE 6.50 usec  
TE 300.0 K  
D1 2.00000000 sec  
D11 0.03000000 sec  
TD0 1

===== CHANNEL f1 =====  
NUC1 13C  
P1 7.18 usec  
PL1 -4.00 dB  
PL1W 82.02445221 W  
SFO1 100.6228298 MHz

===== CHANNEL f2 =====  
CPDPRG2 waltz16  
NUC2 1H  
PCPD2 80.00 usec  
PL2 -3.00 dB  
PL12 14.47 dB  
PL13 15.06 dB  
PL2W 19.34582710 W  
PL12W 0.34640750 W  
PL13W 0.30240381 W  
SFO2 400.1316005 MHz  
SI 32768  
SF 100.6127742 MHz  
WDW EM  
SSB 0  
LB 1.00 Hz  
GB 0  
PC 1.40

AMRI; SRC AV400  
location; 18

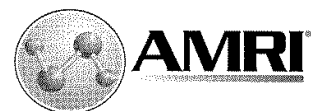

Name \_\_\_\_\_  
Date \_\_\_\_\_  
NB # \_\_\_\_\_

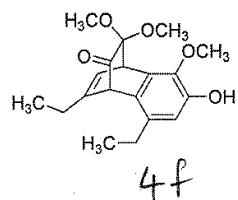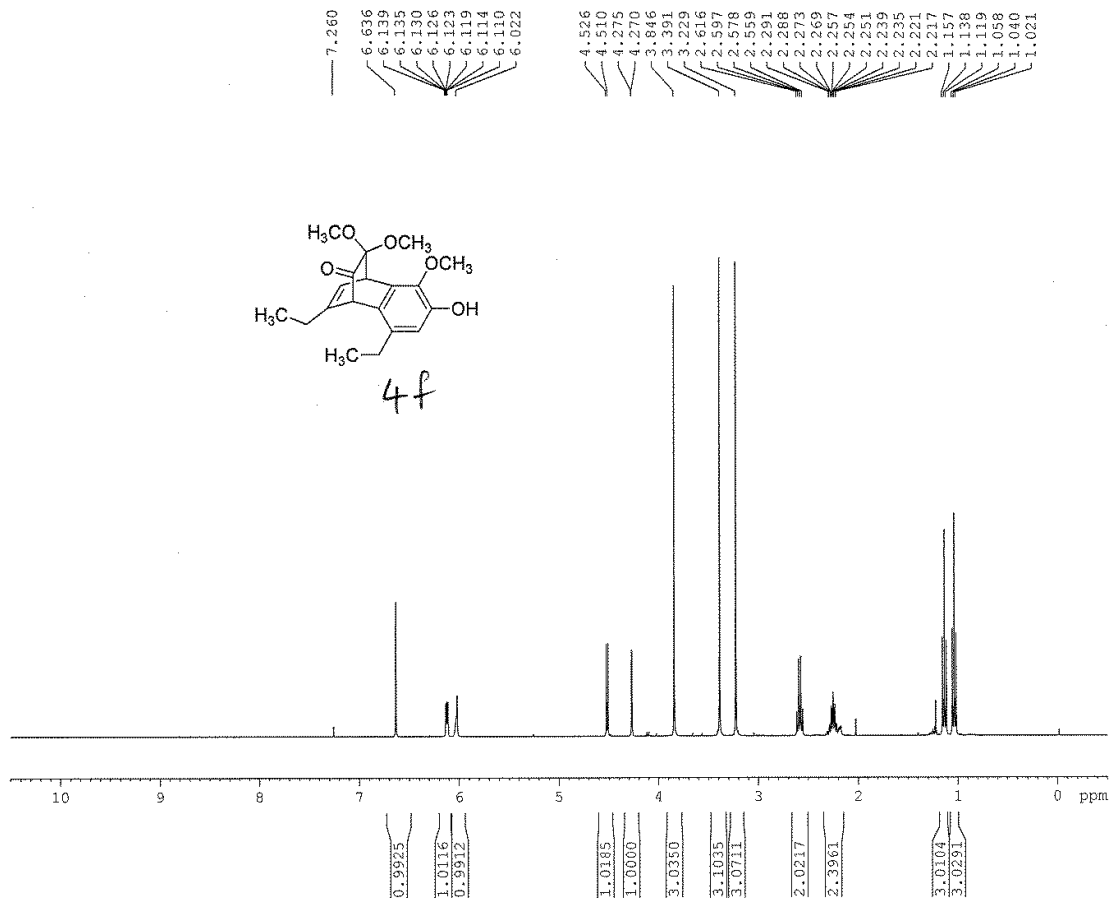

NAME SG-SIR-5Et-Arm  
EXPNO 10  
PROCNO 1  
Date 20140817  
Time 2.29  
INSTRUM spect  
PROBHD 5 mm PABBO BB-  
PULPROG zg30  
TD 65536  
SOLVENT CDCl3  
NS 16  
DS 2  
SWH 8012.820 Hz  
FIDRES 0.122266 Hz  
AQ 4.0894966 sec  
RG 22.6  
DW 62.400 usec  
DE 6.00 usec  
TE 300.0 K  
D1 1.00000000 sec  
TD0 1

===== CHANNEL f1 =====  
NUC1 1H  
P1 10.70 usec  
PL1 -2.00 dB  
PL1W 14.33185768 W  
SFO1 400.2330885 MHz  
SI 32768  
SF 400.2300111 MHz  
WDW EM  
SSB 0  
LB 0.30 Hz  
GB 0  
PC 1.00

AMRI; SRC AV400  
location; 18

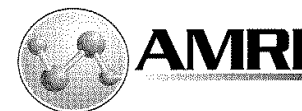

196.920

147.675

147.085

141.331

135.931

132.091

126.210

124.090

113.939

92.259

77.317

76.999

76.681

62.103

57.578

50.279

49.728

41.504

26.727

25.118

15.598

11.367

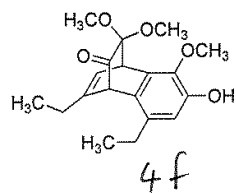

Name \_\_\_\_\_  
Date \_\_\_\_\_  
NB # \_\_\_\_\_

NAME SG-SIR-5Et-Arm  
EXPNO 11  
PROCNO 1  
Date\_ 20140817  
Time 5.11  
INSTRUM spect  
PROBHD 5 mm PABBO BB-  
PULPROG zgpg30  
TD 65536  
SOLVENT CDCl3  
NS 5000  
DS 4  
SWH 24038.461 Hz  
FIDRES 0.366798 Hz  
AQ 1.3631988 sec  
RG 101  
DW 20.800 usec  
DE 6.50 usec  
TE 300.0 K  
D1 0.50000000 sec  
D11 0.03000000 sec  
TD0 1

===== CHANNEL f1 =====  
NUC1 13C  
P1 8.60 usec  
PL1 -1.00 dB  
PL1W 44.58811569 W  
SFO1 100.6479769 MHz

===== CHANNEL f2 =====  
CPDPRG2 waltz16  
NUC2 1H  
PCPD2 80.00 usec  
PL2 -2.00 dB  
PL12 15.47 dB  
PL13 15.72 dB  
PL2W 14.33185768 W  
PL12W 0.25662708 W  
PL13W 0.24227159 W  
SFO2 400.2316009 MHz  
SI 32768  
SF 100.6379302 MHz  
WDW EM  
SSB 0  
LB 1.00 Hz  
GB 0  
PC 1.40

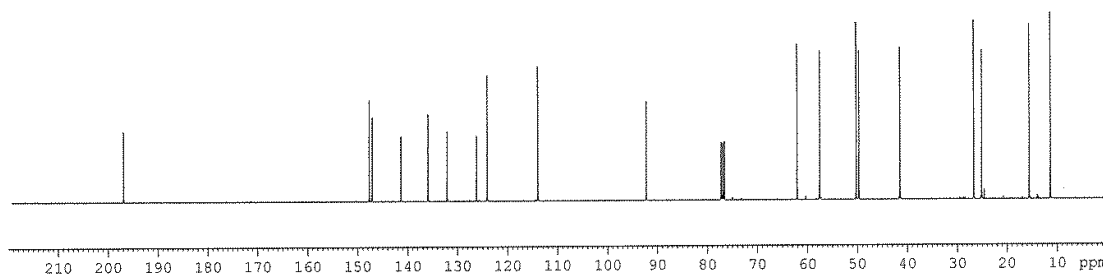

AMRI; SRC AV400  
location; 18

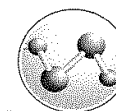

**AMRI**

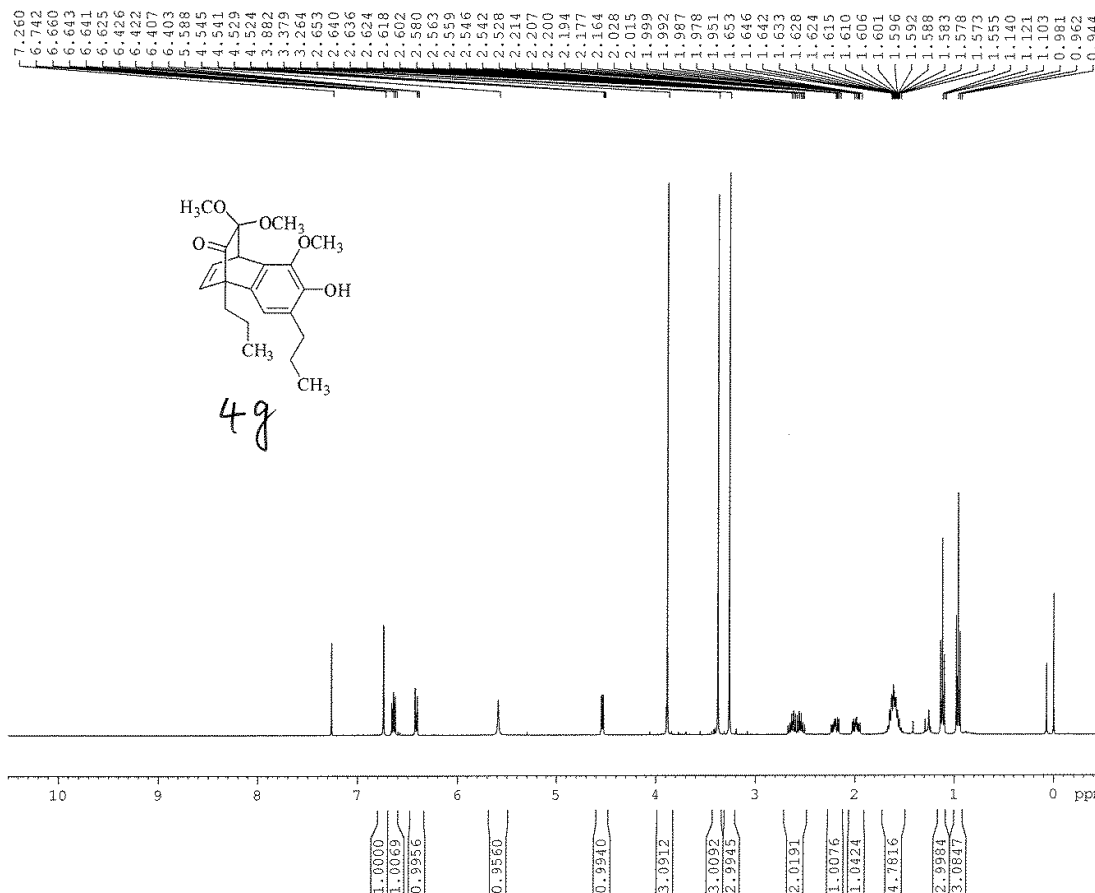

Current Data Parameters  
NAME SG-SIR-6Pr-2OMe-22-D  
EXPNO 20  
PROCNO 1

F2 - Acquisition Parameters  
Date 20131130  
Time 8.21  
INSTRUM spect  
PROBHD 5 mm PABBO BB-  
PULPROG zg30  
TD 65536  
SOLVENT CDC13  
NS 16  
DS 2  
SWH 8012.820 Hz  
FIDRES 0.122266 Hz  
AQ 4.0894966 sec  
RG 90.5  
DW 62.400 usec  
DE 6.00 usec  
TE 300.0 K  
D1 1.00000000 sec  
TD0 1

===== CHANNEL f1 =====  
NUC1 1H  
P1 10.60 usec  
PL1 -2.00 dB  
PL1W 14.33185768 W  
SFO1 400.2330885 MHz

F2 - Processing parameters  
SI 32768  
SF 400.2300121 MHz  
WDW EM  
SSB 0  
LB 0.30 Hz  
GB 0  
PC 1.00

AMRI; SRC AV400  
location; 18

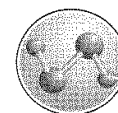

**AMRI**  
ANALYTICAL MEDICAL RESEARCH, INC.

Name \_\_\_\_\_  
Date \_\_\_\_\_  
NB # \_\_\_\_\_

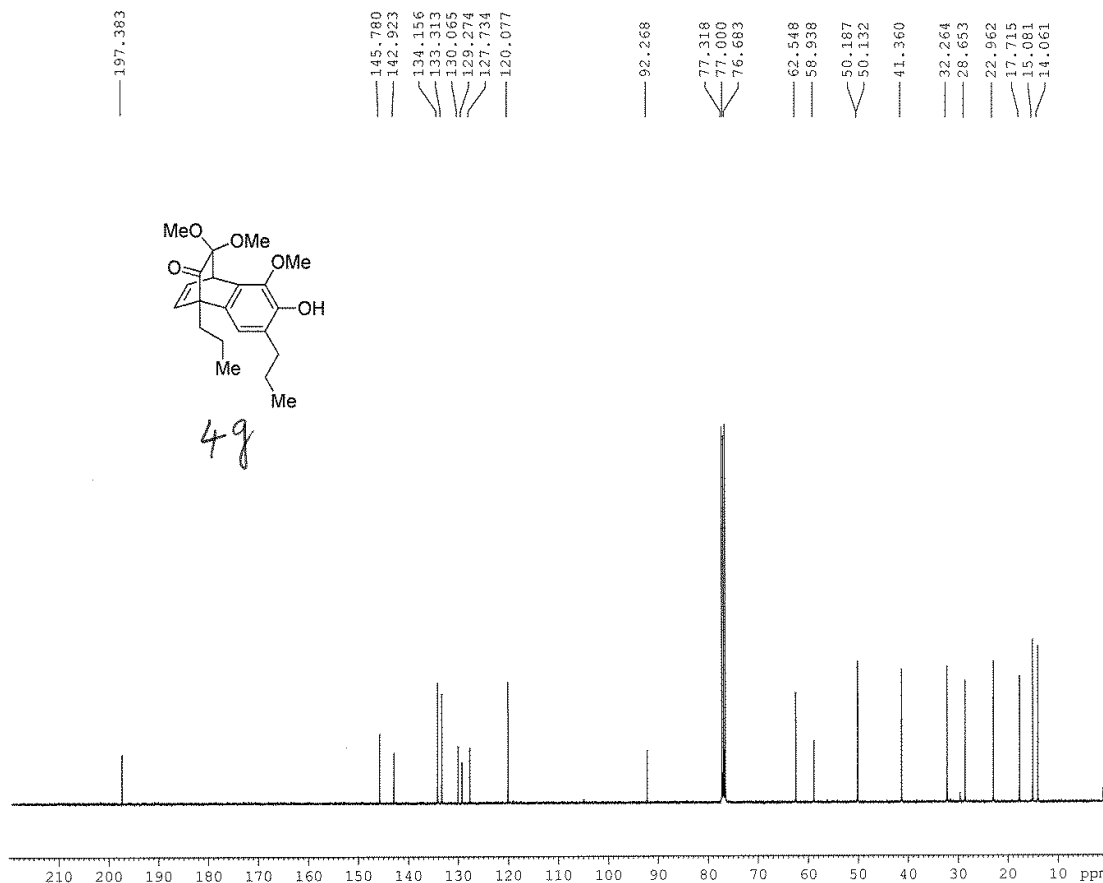

NAME SG-SIR-6Pr-2OMe-22-D  
EXPNO 21  
PROCNO 1  
Date\_ 20131130  
Time 11.36  
INSTRUM spect  
PROBHD 5 mm PABBO BB-  
PULPROG zgpg30  
TD 65536  
SOLVENT CDCl3  
NS 6000  
DS 4  
SWH 24038.461 Hz  
FIDRES 0.366798 Hz  
AQ 1.3631988 sec  
RG 161  
DW 20.800 usec  
DE 6.50 usec  
TE 300.0 K  
D1 0.50000000 sec  
D11 0.03000000 sec  
TDO 1

===== CHANNEL f1 =====  
NUC1 13C  
P1 8.50 usec  
PL1 -1.00 dB  
PL1W 44.58811569 W  
SFO1 100.6479769 MHz

===== CHANNEL f2 =====  
CPDPRG2 waltz16  
NUC2 1H  
PCPD2 80.00 usec  
PL2 -2.00 dB  
PL12 15.56 dB  
PL13 15.72 dB  
PL2W 14.33185768 W  
PL12W 0.25136364 W  
PL13W 0.24227159 W  
SFO2 400.2316009 MHz  
SI 32768  
SF 100.6379161 MHz  
WDW EM  
SSB 0  
LB 1.00 Hz  
GB 0  
PC 1.40

AMRI; SRC AV400  
location; 18

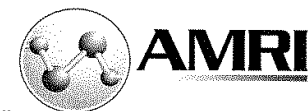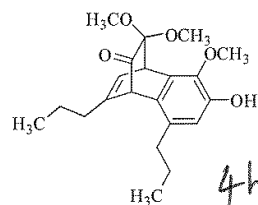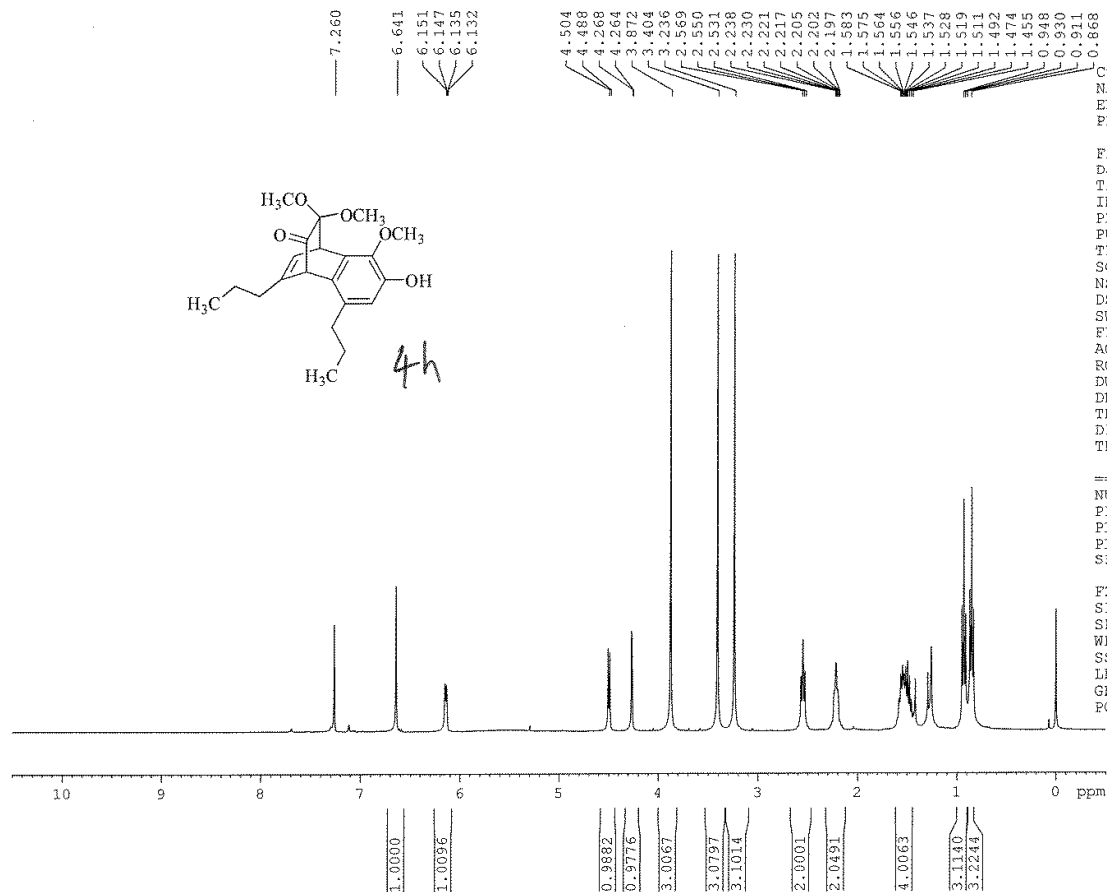

Current Data Parameters  
NAME SG-SIR-5Pr-2OMe-21-D  
EXPNO 10  
PROCNO 1

F2 - Acquisition Parameters  
Date\_ 20131113  
Time\_ 21.07  
INSTRUM spect  
PROBHD 5 mm PABBO BB-  
PULPROG zg30  
TD 65536  
SOLVENT CDCl3  
NS 16  
DS 2  
SWH 8012.820 Hz  
FIDRES 0.122266 Hz  
AQ 4.0894966 sec  
RG 90.5  
DW 62.400 usec  
DE 6.00 usec  
TE 300.0 K  
D1 1.00000000 sec  
TD0 1

===== CHANNEL f1 =====  
NUC1 1H  
P1 10.60 usec  
PL1 -2.00 dB  
PL1W 14.33185768 W  
SFO1 400.2330885 MHz

F2 - Processing parameters  
SI 32768  
SF 400.2300120 MHz  
WDW EM  
SSB 0  
LB 0.30 Hz  
GB 0  
PC 1.00

AMRI; SRC AV400  
location; 18

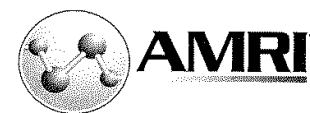

196.774

147.476

145.654

141.348

134.667

131.933

126.787

125.401

114.461

92.331

77.318

77.001

76.683

62.437

57.784

50.502

49.803

41.746

35.868

34.183

24.576

20.245

13.845

13.443

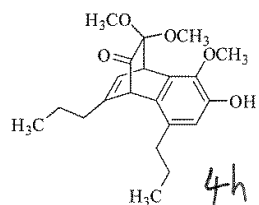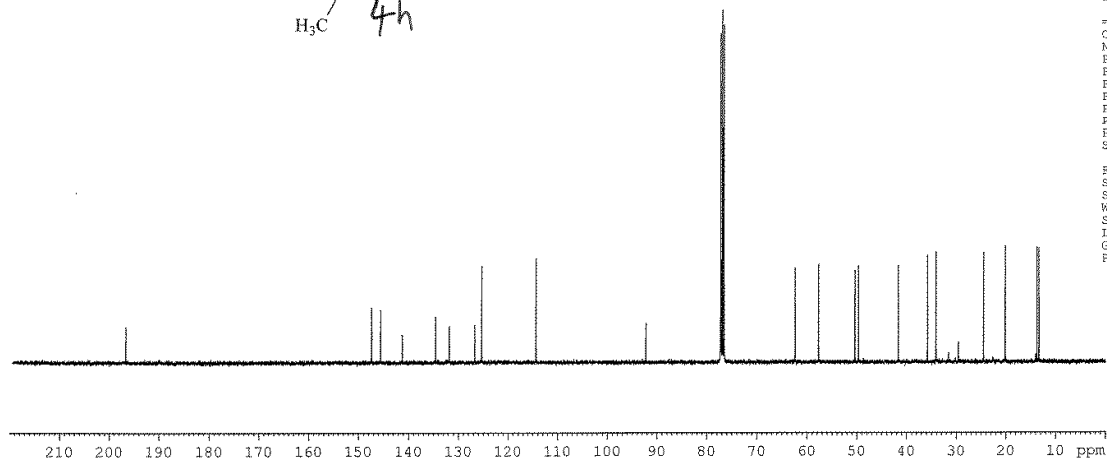

Current Data Parameters  
NAME SG-5IR-5Pr-20Me-21-D  
EXPNO 11  
PROCNO 1

F2 - Acquisition Parameters  
Date 20131113  
Time 22.46  
INSTRUM spect  
PROBHD 5 mm PABBO BG-  
PULPROG zgpg30  
TD 65536  
SOLVENT CDCl3  
NS 3000  
DS 4  
SWH 24038.461 Hz  
FIDRES 0.366798 Hz  
AQ 1.3631988 sec  
RG 181  
RW 20.800 usec  
DE 6.50 usec  
TE 300.0 K  
D1 0.50000000 sec  
D11 0.03000000 sec  
TD0 1

===== CHANNEL f1 =====  
NUC1 13C  
P1 8.50 usec  
PL1 -1.00 dB  
PL1W 44.58811569 W  
SFO1 100.6479769 MHz

===== CHANNEL f2 =====  
CPDPRG2 waltz16  
NUC2 1H  
PCPD2 80.00 usec  
PL2 -2.00 dB  
PL12 15.56 dB  
PL13 15.72 dB  
PL2W 14.33185768 W  
PL12W 0.29136364 W  
PL13W 0.24227159 W  
SFO2 400.2316009 MHz

F2 - Processing parameters  
SI 32768  
SF 100.6379157 MHz  
WDW EM  
SSB 0  
LB 1.00 Hz  
GB 0  
PC 1.40

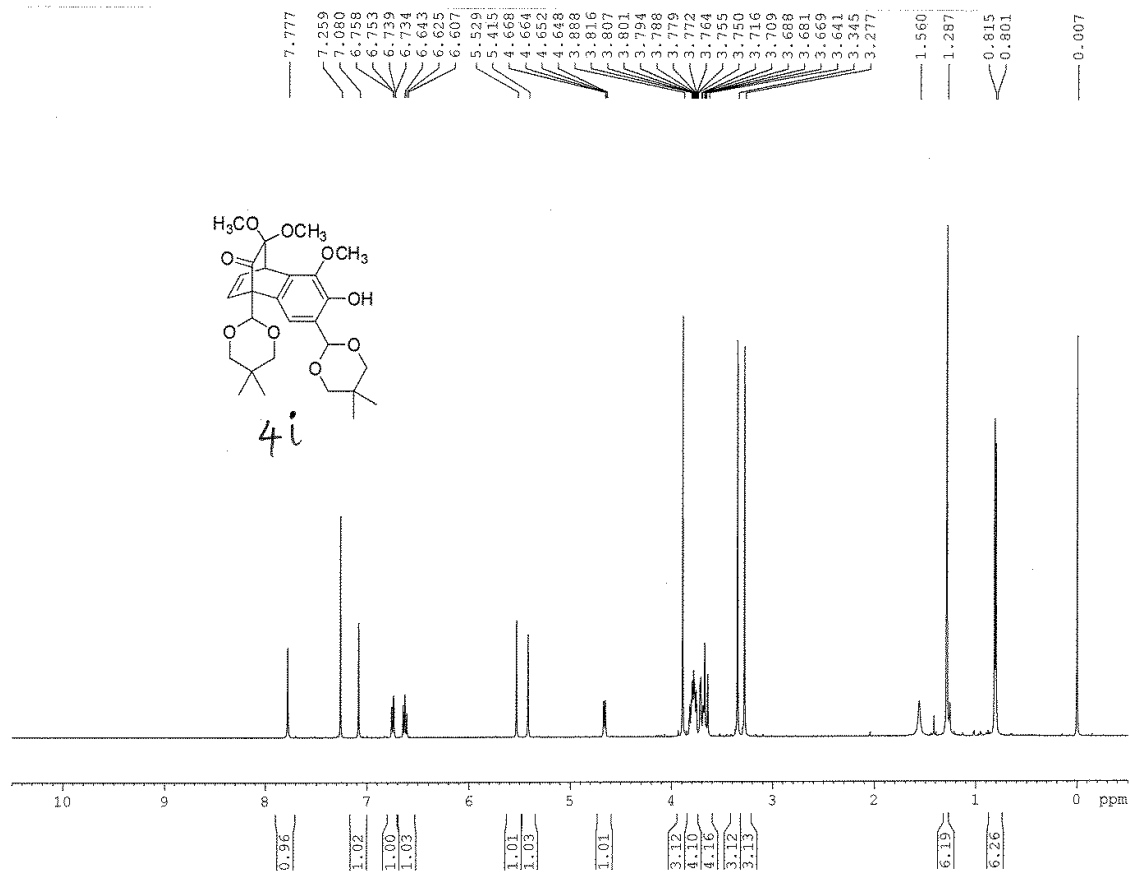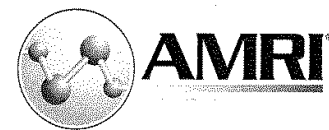

Current Data Parameters  
 NAME SG-SIR-6Krl-20Me-23-D  
 EXPNO 10  
 PROCNO 1

F2 - Acquisition Parameters  
 Date 20131125  
 Time 18.48  
 INSTRUM spect  
 PROBD 5 mm PABD BB-  
 PULPROG zg30  
 TD 65536  
 SOLVENT CDCl3  
 NS 16  
 DS 2  
 SWH 8012.820 Hz  
 FIDRES 0.122266 Hz  
 AQ 4.0894966 sec  
 RG 228.1  
 DR 62.400 usec  
 DE 6.50 usec  
 TE 300.0 K  
 D1 1.00000000 sec  
 TDO 1

===== CHANNEL f1 =====  
 NUC1 1H  
 P1 10.50 usec  
 PL1 -3.00 dB  
 PL1W 19.34582710 W  
 SFO1 400.1318542 MHz

F2 - Processing parameters  
 SI 32768  
 SF 400.1300096 MHz  
 WDW EM  
 SSB 0  
 LB 0.30 Hz  
 GB 0  
 PC 1.00

Name \_\_\_\_\_

Date \_\_\_\_\_

NB # \_\_\_\_\_

AMRI; SRC AV400  
location; 18

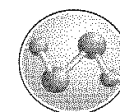

**AMRI**

194.007

147.589  
144.196  
133.637  
132.830  
131.229  
126.887  
121.676  
119.191  
102.175  
98.956  
92.346  
77.648  
77.537  
77.319  
77.002  
76.684  
62.522  
61.487  
50.438  
50.022  
41.155  
30.335  
30.311  
23.261  
22.975  
21.949  
21.803

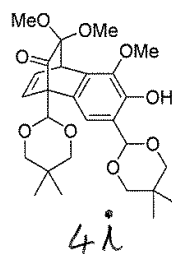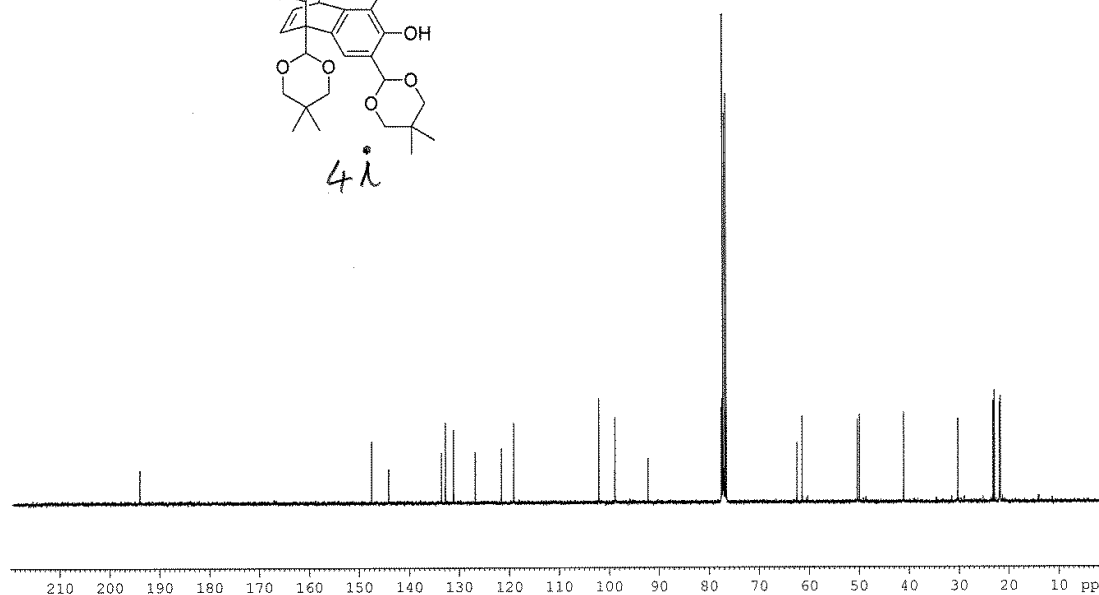

Name \_\_\_\_\_  
Date \_\_\_\_\_  
NB # \_\_\_\_\_

NAME SG-BCK-6KETAL-ARM  
EXPNO 11  
PROCNO 1  
Date\_ 20140820  
Time 22.28  
INSTRUM spect  
PROBHD 5 mm PABBO BB-  
PULPROG zgpg30  
TD 65536  
SOLVENT CDCl3  
NS 2500  
DS 4  
SWH 24038.461 Hz  
FIDRES 0.366798 Hz  
AQ 1.3631988 sec  
RG 101  
DW 20.800 usec  
DE 6.50 usec  
TE 300.0 K  
D1 0.50000000 sec  
D11 0.03000000 sec  
TD0 1

===== CHANNEL f1 =====  
NUC1 13C  
P1 8.60 usec  
PL1 -1.00 dB  
PL1W 44.58811569 W  
SFO1 100.6479769 MHz

===== CHANNEL f2 =====  
CPDPRG2 waltz16  
NUC2 1H  
ECFD2 80.00 usec  
PL2 -2.00 dB  
PL12 15.47 dB  
PL13 15.72 dB  
PL2W 14.33185768 W  
PL12W 0.25662798 W  
PL13W 0.24227159 W  
SFO2 400.2316009 MHz  
SI 32768  
SF 100.6379168 MHz  
WDW EM  
SSB 0  
LB 1.00 Hz  
GB 0  
PC 1.40

AMRI; SRC AV400  
location; 18

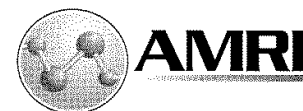

Name \_\_\_\_\_  
Date \_\_\_\_\_  
NB # \_\_\_\_\_

7.260  
7.109  
6.568  
6.566  
6.564  
6.562  
6.552  
6.549  
6.548  
6.545  
5.577  
5.514  
5.016  
5.016  
4.861  
4.857  
4.613  
4.596  
3.829  
3.788  
3.781  
3.760  
3.754  
3.745  
3.718  
3.711  
3.675  
3.668  
3.662  
3.652  
3.641  
3.635  
3.628  
3.601  
3.594  
3.451  
3.441  
3.433  
3.424  
3.389  
3.238  
1.281  
1.228  
0.787  
0.734

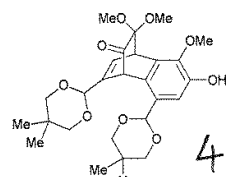

NAME SG-BCK-5-Ketal-Ar  
EXPNO 10  
PROCNO 1  
Date 20140731  
Time 0.15  
INSTRUM spect  
PROBHD 5 mm PABBO BB-  
PULPROG zg30  
TD 65536  
SOLVENT CDCl3  
NS 16  
DS 2  
SWH 8012.820 Hz  
FIDRES 0.122266 Hz  
AQ 4.0894966 sec  
RG 71.8  
DW 62.400 usec  
DE 6.00 usec  
TE 300.0 K  
D1 1.00000000 sec  
TD0 1

===== CHANNEL f1 =====  
NUC1 1H  
P1 10.70 usec  
PL1 -2.00 dB  
PL1W 14.33185768 W  
SFO1 400.2330885 MHz  
SI 32768  
SF 400.2300120 MHz  
WDW EM  
SSB 0  
LB 0.30 Hz  
GB 0  
PC 1.00

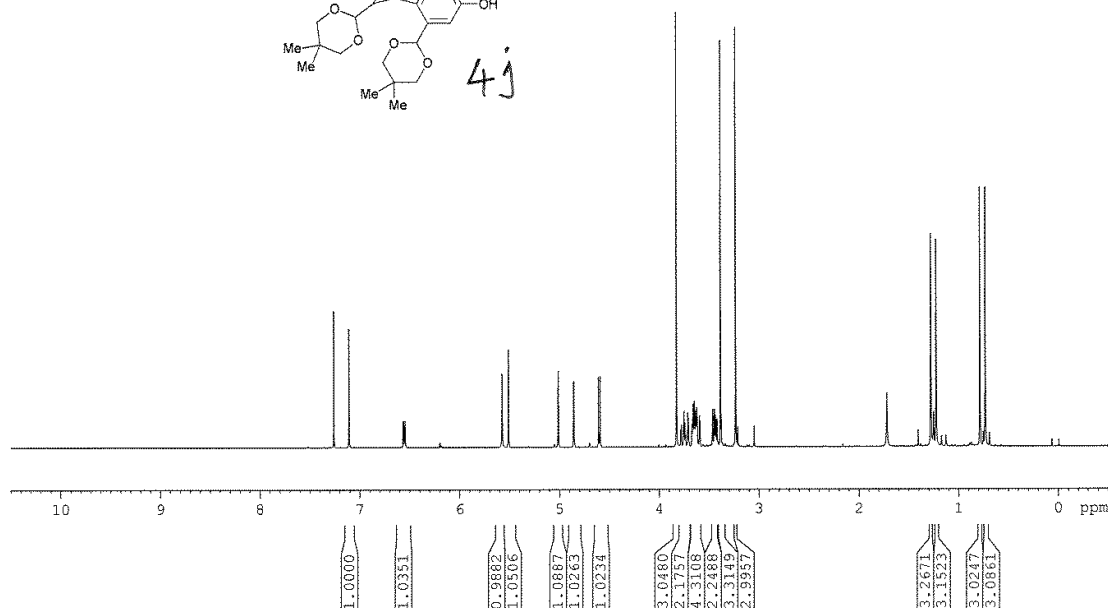

AMRI; SRC AV400  
location; 18

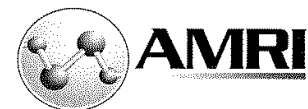

Name \_\_\_\_\_  
Date \_\_\_\_\_  
NB # \_\_\_\_\_

Current Data Parameters  
NAME SG-BCK-5-Ketal-Ar  
EXFNO 11  
PROCNO 1

F2 - Acquisition Parameters  
Date\_ 20140731  
Time 2.25  
INSTRUM spect  
PROBHD 5 mm PARBO BB-  
PULPROG zgpg30  
TD 65536  
SOLVENT CDCl3  
NS 4000  
DS 4  
SWH 24038.461 Hz  
FIDRES 0.366798 Hz  
AQ 1.3631988 sec  
RG 161  
DW 20.800 usec  
DE 6.50 usec  
TE 300.0 K  
D1 0.50000000 sec  
D11 0.03000000 sec  
TDO 1

===== CHANNEL f1 =====  
NUC1 13C  
P1 8.60 usec  
PL1 -1.00 dB  
PL1W 44.59811569 W  
SE01 100.6479769 MHz

===== CHANNEL f2 =====  
CPDPRG2 waltz16  
NUC2 1H  
PCPD2 80.00 usec  
PL2 -2.00 dB  
PL12 15.47 dB  
PL13 15.72 dB  
PL2W 14.33185768 W  
PL12W 0.25662708 W  
PL13W 0.24227159 W  
SF02 400.2316009 MHz

F2 - Processing parameters  
SI 32768  
SF 100.6379180 MHz  
WDW EM  
SSB 0  
LB 1.00 Hz  
GB 0  
PC 1.40

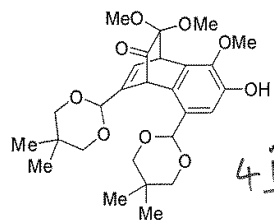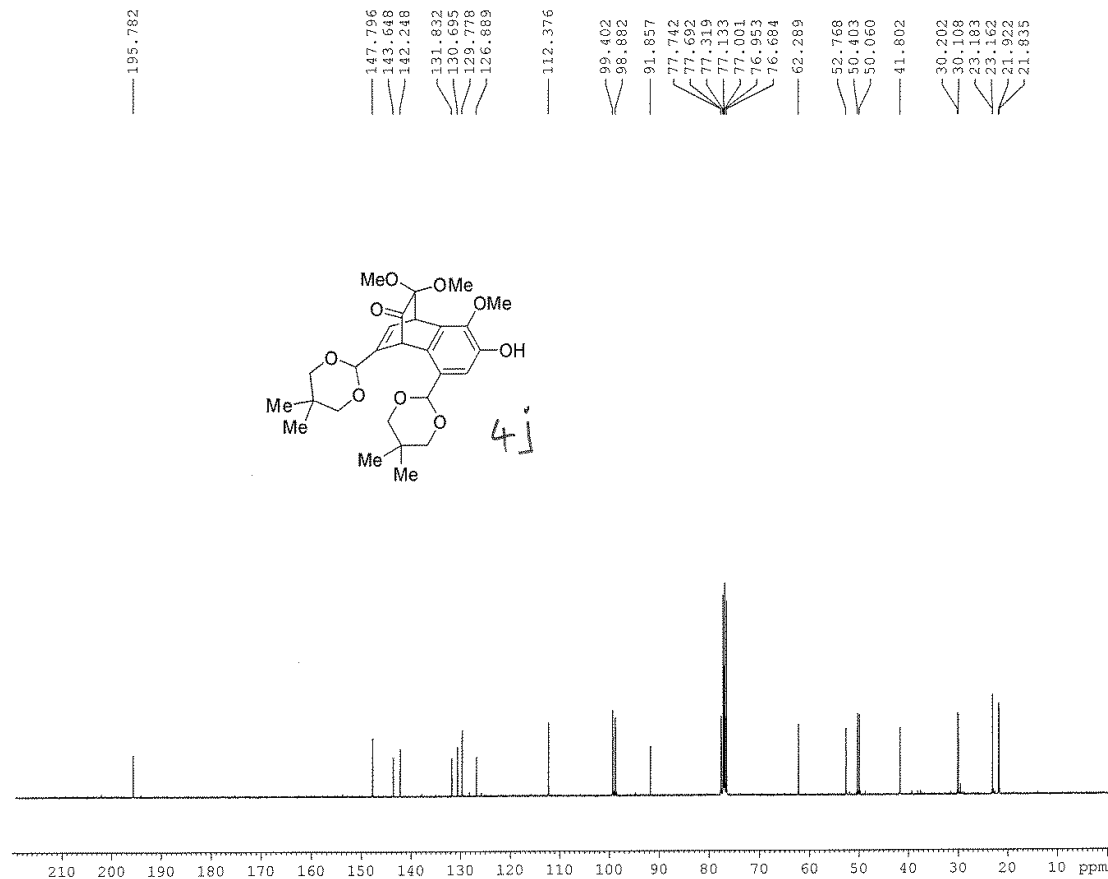

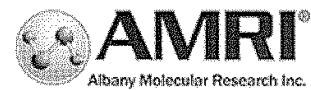

7.262  
6.828  
6.715  
6.708  
6.662  
6.640

5.563

4.627  
4.620  
4.605  
4.599

3.956  
3.897  
3.796

3.385  
3.292

2.042

1.580  
1.293  
1.281  
1.258

0.000

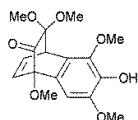

4K

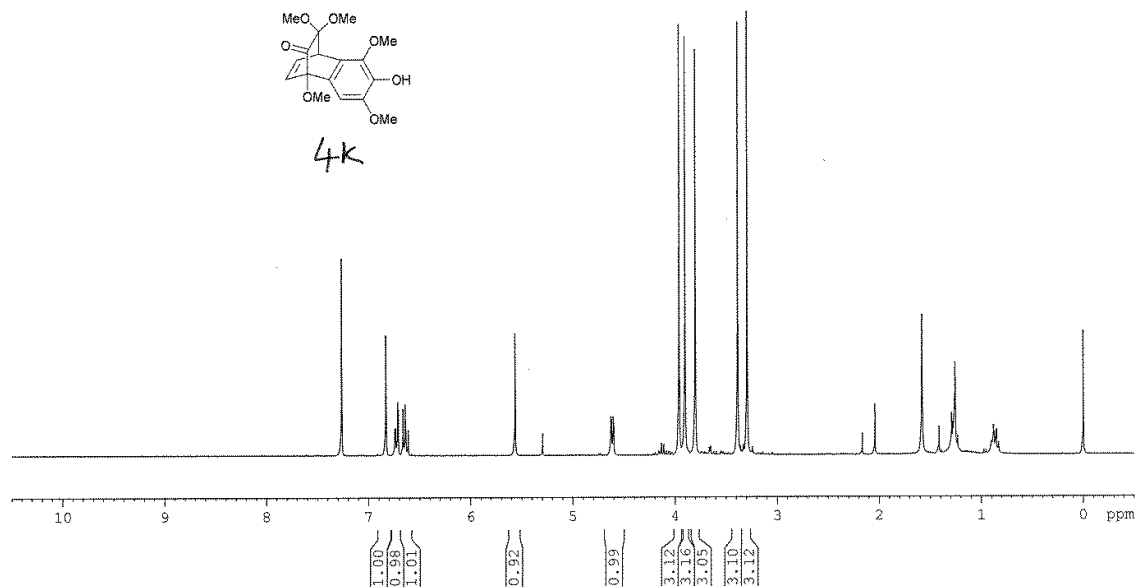

NAME SG-BCK-6OMe-Ar-dimer  
EXPNO 10  
PROCNO 1  
Date\_ 20140729  
Time 17.04  
INSTRUM spect  
PROBHD 5 mm QNP 1H/13  
PULPROG zg30  
TD 32768  
SOLVENT CDCl3  
NS 16  
DS 2  
SWH 5995.204 Hz  
FIDRES 0.182959 Hz  
AQ 2.7329011 sec  
RG 574.7  
DW 83.400 usec  
DE 6.00 usec  
TE 300.0 K  
D1 1.00000000 sec  
MCREST 0.00000000 sec  
MCWRK 0.01500000 sec

\*\*\*\*\* CHANNEL f1 \*\*\*\*\*  
NUC1 1H  
P1 12.20 usec  
PL1 0.00 dB  
SFO1 300.1319508 MHz  
SI 16384  
SF 300.1300059 MHz  
WDW EM  
SSB 0  
LB 0.30 Hz  
GB 0  
PC 1.00

Name \_\_\_\_\_

Date \_\_\_\_\_

NB # \_\_\_\_\_

# AMRI; SRC location; 15

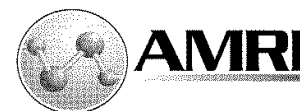

Name \_\_\_\_\_  
Date \_\_\_\_\_  
NB # \_\_\_\_\_

NAME SG-BCK-6-OMe-Dimer-Ar  
EXPNO 10  
PROCNO 1  
Date 20140730  
Time 0.11  
INSTRUM spect  
PROBHD 5 mm QNP 1H/13  
PULPROG zgpg30  
TD 65536  
SOLVENT CDCl3  
NS 512  
DS 0  
SWH 22675.736 Hz  
FIDRES 0.346004 Hz  
AQ 1.4451188 sec  
RG 1625.5  
DW 22.050 usec  
DE 6.00 usec  
TE 300.0 K  
D1 0.50000000 sec  
d11 0.03000000 sec  
DELTA 0.40000001 sec  
MCREST 0.00000000 sec  
MCWRK 0.01500000 sec

===== CHANNEL f1 =====  
NUC1 13C  
P1 8.00 usec  
PL1 -2.00 dB  
SFO1 75.4767751 MHz

===== CHANNEL f2 =====  
CPDPRG2 waltz16  
NUC2 1H  
PCPD2 80.00 usec  
PL2 0.00 dB  
PL12 16.33 dB  
PL13 16.00 dB  
SFO2 300.1315007 MHz  
SI 131072  
SF 75.4677503 MHz  
WDW EM  
SSB 0  
LB 0.30 Hz  
GB 0  
PC 1.40

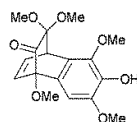

4K

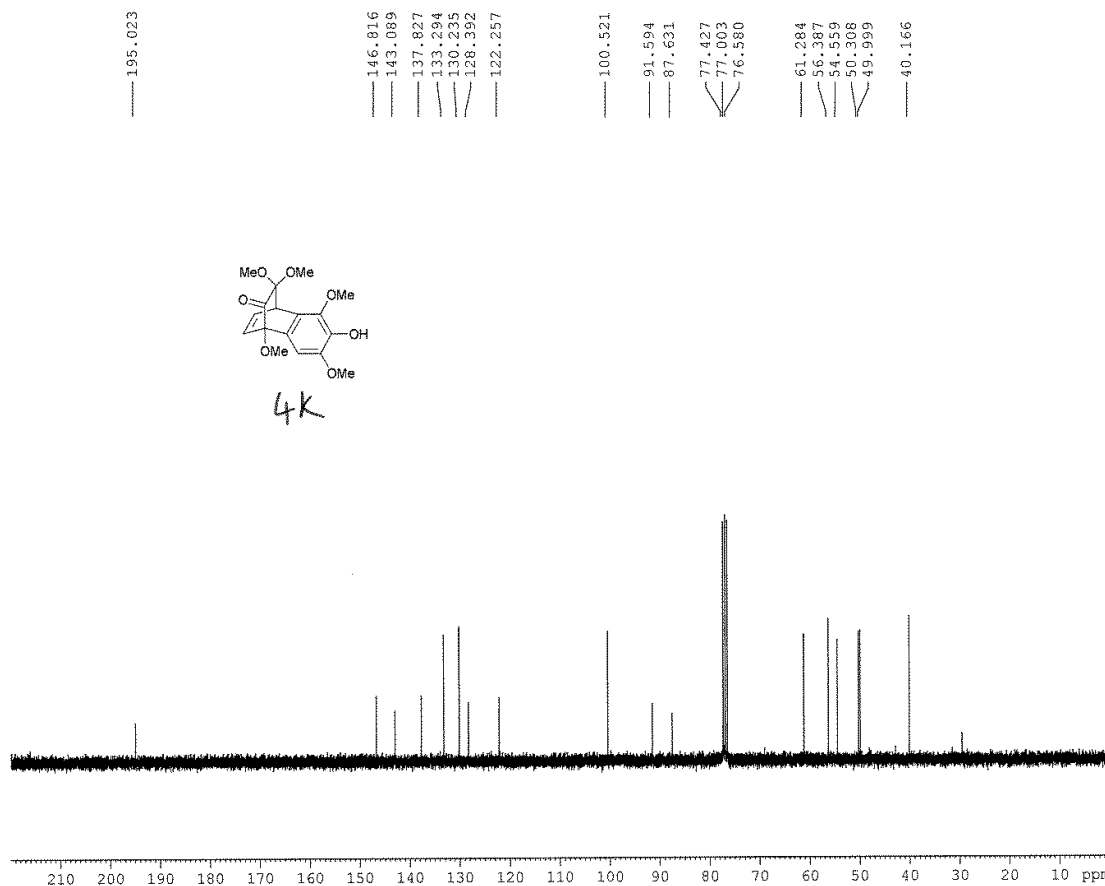

7.260  
6.882  
6.849  
6.803  
6.798  
6.580  
6.575  
6.559  
6.553  
6.509  
6.504  
6.490  
6.485  
6.481  
6.467  
6.461  
5.948  
5.916  
4.364  
4.358  
4.343  
4.338  
4.056  
4.051  
4.037  
4.032  
3.338  
3.315  
3.304  
3.125

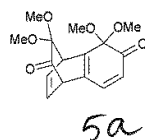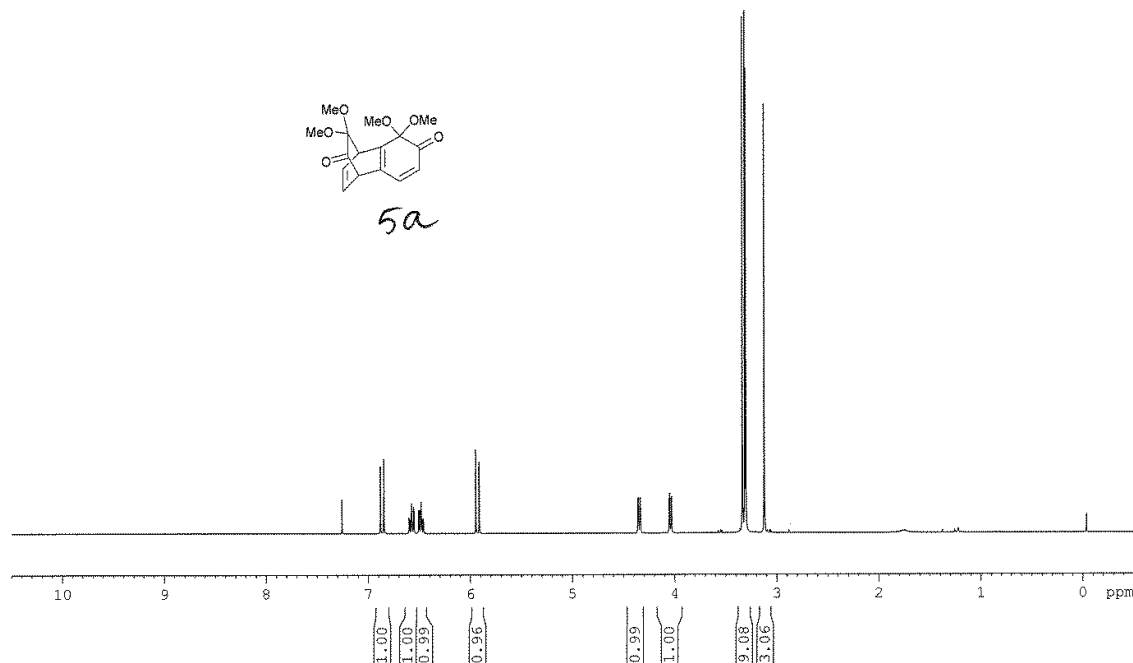

NAME SG-BCK-ArGD-DAIB  
EXPNO 20  
PROCNO 1  
Date 20140823  
Time 8.35  
INSTRUM spect  
PROBHD 5 mm QNP 1H/13  
PULPROG zg30  
TD 32768  
SOLVENT CDC13  
NS 16  
DS 2  
SWH 5995.204 Hz  
FIDRES 0.182959 Hz  
AQ 2.7329011 sec  
RG 90.5  
DW 83.400 usec  
DE 6.00 usec  
TE 300.0 K  
D1 1.00000000 sec  
MCREST 0.00000000 sec  
MCWRK 0.01500000 sec

===== CHANNEL f1 =====  
NUC1 1H  
P1 12.20 usec  
PL1 0.00 dB  
SFO1 300.1319508 MHz  
SI 16384  
SF 300.1300063 MHz  
WDW EM  
SSB 0  
LB 0.30 Hz  
GB 0  
PC 1.00

Name \_\_\_\_\_

Date \_\_\_\_\_

NB # \_\_\_\_\_

AMRI; SRC  
location; 15

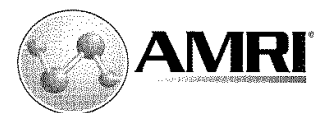

196.787  
193.752

146.772  
139.217  
135.039  
134.388  
128.358  
125.417

92.522  
90.323

77.423  
76.999  
76.575

57.032  
51.080  
50.588  
49.781  
44.120

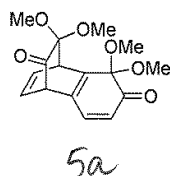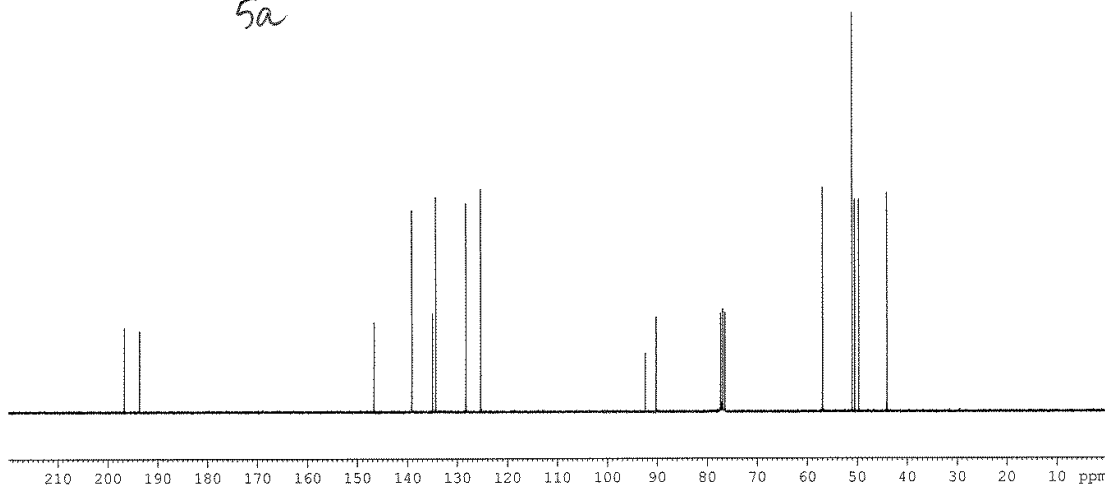

Name \_\_\_\_\_  
Date \_\_\_\_\_  
NB # \_\_\_\_\_

NAME SG-BCK-ArGD-DAIB  
EXPNO 21  
PROCNO 1  
Date 20140823  
Time 9.59  
INSTRUM spect  
PROBHD 5 mm QNP 1H/13  
PULPROG zgpg30  
TD 65536  
SOLVENT CDCl3  
NS 2500  
DS 0  
SWH 22675.736 Hz  
FIDRES 0.346004 Hz  
AQ 1.4451188 sec  
RG 4597.6  
DW 22.050 usec  
DE 6.00 usec  
TE 300.0 K  
D1 0.50000000 sec  
d11 0.03000000 sec  
DELTA 0.40000001 sec  
MCREST 0.00000000 sec  
MCWRR 0.01500000 sec

===== CHANNEL f1 =====  
NUC1 13C  
P1 8.00 usec  
PL1 -2.00 dB  
SFO1 75.4767751 MHz

===== CHANNEL f2 =====  
CPDPRG2 waltz16  
NUC2 1H  
PCPD2 80.00 usec  
PL2 0.00 dB  
PL12 16.33 dB  
PL13 16.00 dB  
SFO2 300.1315007 MHz  
SI 131072  
SF 75.4677536 MHz  
WDW EM  
SSB 0  
LB 0.30 Hz  
GB 0  
PC 1.40

AMRI; SRC AV400  
location; 18

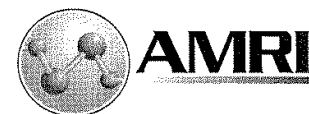

Name \_\_\_\_\_

Date \_\_\_\_\_

NB # \_\_\_\_\_

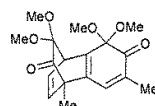

5C

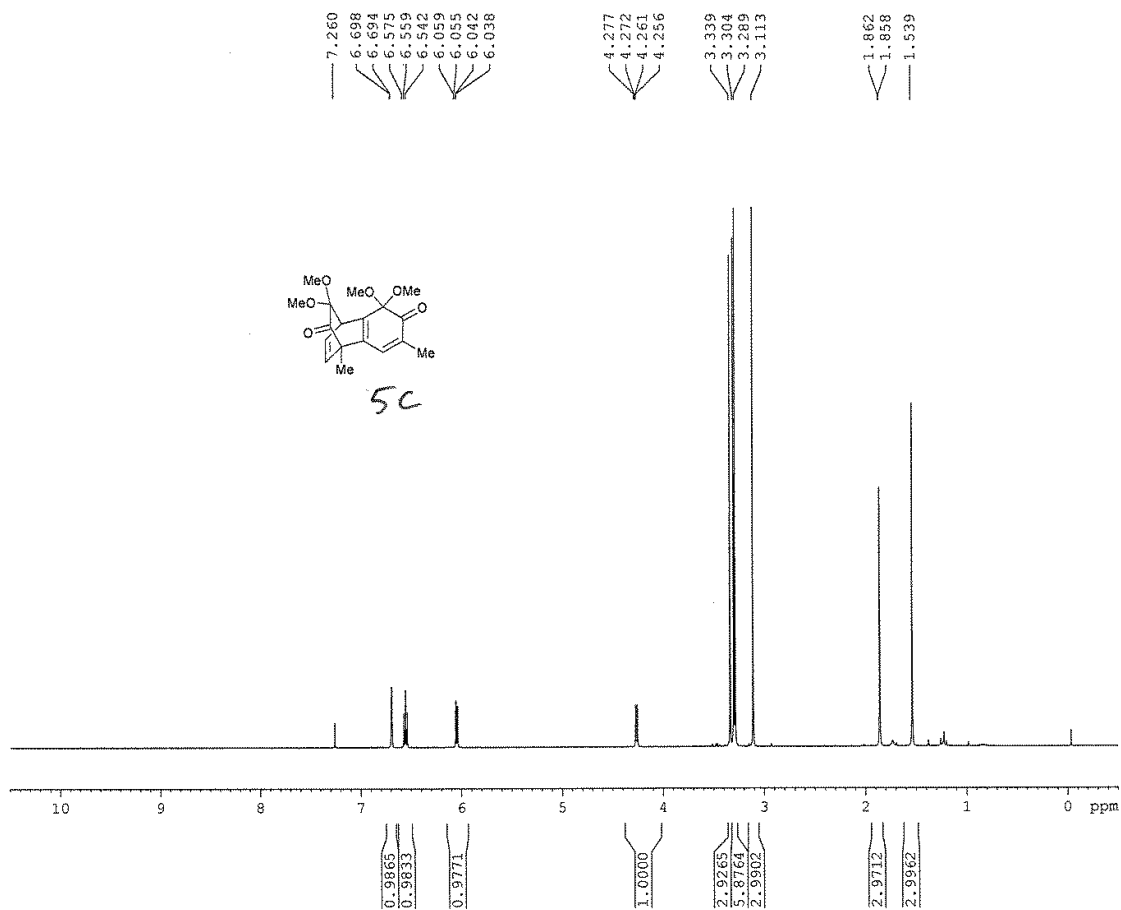

NAME SG-BCK-6Me-dimer-ARM-DAIB  
EXPNO 10  
PROCNO 1  
Date\_ 20140829  
Time 18.16  
INSTRUM spect  
PROBHD 5 mm PABBO BB-  
PULPROG zg30  
TD 65536  
SOLVENT CDCl3  
NS 16  
DS 2  
SWH 8012.820 Hz  
FIDRES 0.122266 Hz  
AQ 4.0894966 sec  
RG 45.2  
DW 62.400 usec  
DE 6.00 usec  
TE 300.0 K  
D1 1.00000000 sec  
TDO 1

===== CHANNEL f1 =====  
NUC1 1H  
P1 10.70 usec  
PL1 -2.00 dB  
PL1W 14.33185768 W  
SFO1 400.2330885 MHz  
SI 32768  
SF 400.2300116 MHz  
WDW EM  
SSB 0  
LB 0.30 Hz  
GB 0  
PC 1.00

AMRI; SRC AV400  
location; 18

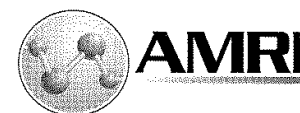

Name \_\_\_\_\_  
Date \_\_\_\_\_  
NB # \_\_\_\_\_

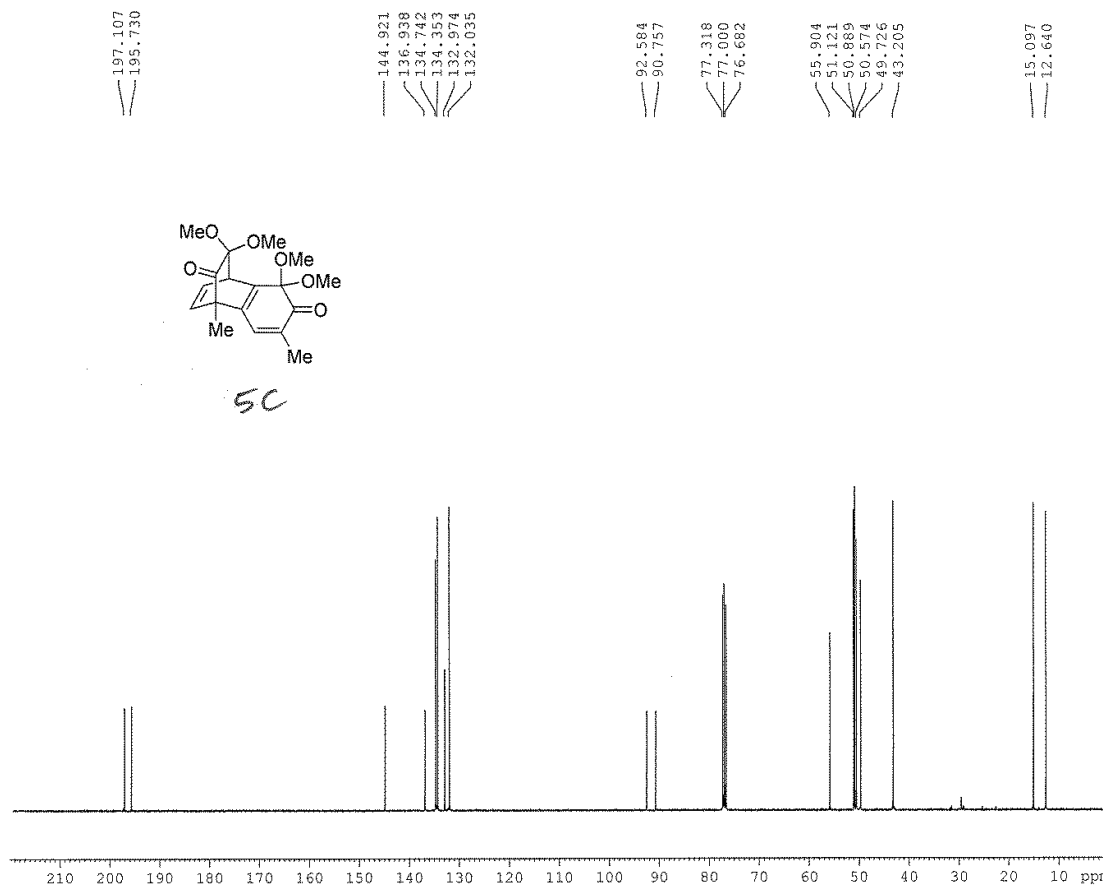

NAME SG-BCK-6Me-dimer-ARm-DAIB  
EXRNO 21  
PROCNO 1  
Date 20140830  
Time 8.32  
INSTRUM spect  
PROBHD 5 mm PABBO BB-  
PULPROG zgpg30  
TD 65536  
SOLVENT CDCl3  
NS 3000  
DS 4  
SWH 24038.461 Hz  
FIDRES 0.366798 Hz  
AQ 1.3631988 sec  
RG 101  
DW 20.800 usec  
DE 6.50 usec  
TE 300.0 K  
D1 0.50000000 sec  
D11 0.03000000 sec  
TDO 1

===== CHANNEL f1 =====  
NUC1 13C  
P1 8.60 usec  
PL1 -1.00 dB  
PL1W 44.58811569 W  
SF01 100.6479769 MHz

===== CHANNEL f2 =====  
CPDPRG2 waltz16  
NUC2 1H  
PCPD2 80.00 usec  
PL2 -2.00 dB  
PL12 15.47 dB  
PL13 15.72 dB  
PL2W 14.33185768 W  
PL12W 0.25662708 W  
PL13W 0.24227159 W  
SF02 400.2316089 MHz  
SI 32768  
SF 100.6379203 MHz  
WDW BM  
SSB 0  
LB 1.00 Hz  
GB 0  
PC 1.40

AMRI; SRC AV400  
location; 18

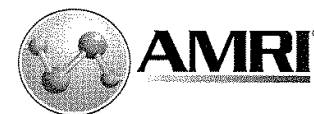

Name \_\_\_\_\_  
Date \_\_\_\_\_  
NB # \_\_\_\_\_

7.260  
6.151  
6.147  
6.142  
6.135  
6.131  
6.127  
5.839  
5.836  
5.832  
4.233  
4.217  
3.987  
3.983  
3.342  
3.333  
3.296  
3.168  
2.098  
2.094  
1.961  
1.957

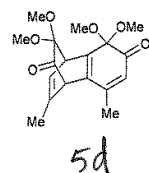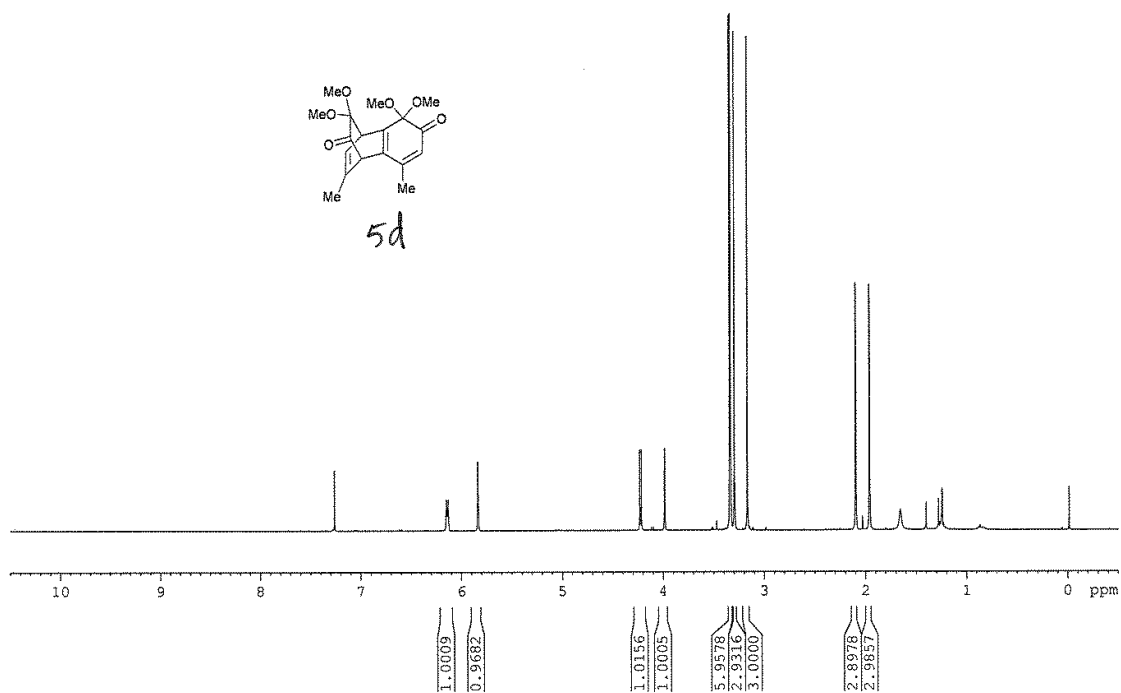

NAME SG-BCK-5Me-dimer-ARM-DAIB  
EXPNO 10  
PROCNO 1  
Date\_ 20140829  
Time 18.09  
INSTRUM spect  
PROBHD 5 mm PABBO BB-  
PULPROG zg30  
TD 65536  
SOLVENT CDCl3  
NS 16  
DS 2  
SWH 8012.820 Hz  
FIDRES 0.122266 Hz  
AQ 4.0894966 sec  
RG 80.6  
DW 62.400 usec  
DE 6.00 usec  
TE 300.0 K  
D1 1.00000000 sec  
TDO 1

===== CHANNEL f1 =====  
NUC1 1H  
P1 10.70 usec  
PL1 -2.00 dB  
PL1W 14.33185768 W  
SFO1 400.230985 MHz  
SI 32768  
SF 400.2300117 MHz  
WDW EM  
SSB 0  
LB 0.30 Hz  
GB 0  
PC 1.00

AMRI; SRC AV400  
location; 18

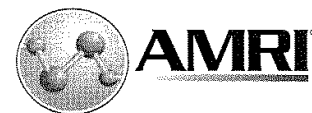

Name \_\_\_\_\_  
Date \_\_\_\_\_  
NB # \_\_\_\_\_

195.858  
194.574

149.394  
146.982

138.882  
136.186

126.879  
123.550

92.424  
90.759

77.317  
77.000  
76.682

59.130  
51.306  
51.155  
50.424  
50.032  
43.629

20.611  
19.392

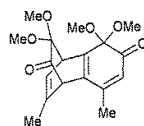

5d

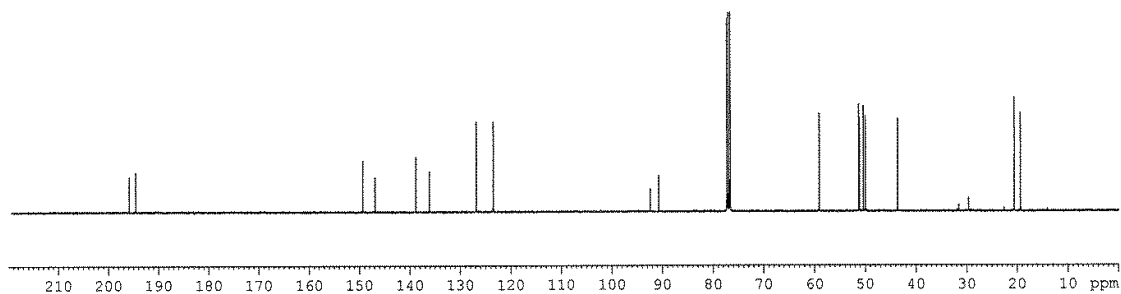

NAME SG-BCK-5Me-dimer-ARM-DAIB  
EXPNO 21  
PROCNO 1  
Date\_ 20140830  
Time 5.07  
INSTRUM spect  
PROBHD 5 mm F4BBO BB-  
PULPROG zgpg30  
TD 65536  
SOLVENT CDCl3  
NS 3000  
DS 4  
SWH 24038.461 Hz  
FIDRES 0.366798 Hz  
AQ 1.3631988 sec  
RG 101  
DW 20.800 usec  
DE 6.50 usec  
TE 300.0 K  
D1 0.50000000 sec  
D11 0.03000000 sec  
TD0 1

===== CHANNEL f1 =====  
NUC1 13C  
P1 8.60 usec  
PL1 -1.00 dB  
PL1W 44.58811569 W  
SFO1 100.6479769 MHz

===== CHANNEL f2 =====  
CPDPRG2 waltz16  
NUC2 1H  
PCPD2 80.00 usec  
PL2 -2.00 dB  
PL12 15.47 dB  
PL13 15.72 dB  
PL2W 14.33185768 W  
PL12W 0.25662708 W  
PL13W 0.24227159 W  
SFO2 400.2316009 MHz  
SI 32768  
SF 100.6379171 MHz  
WDW EM  
SSB 0  
LB 1.00 Hz  
GB 0  
PC 1.40

AMRI; SRC AV400  
location; 18

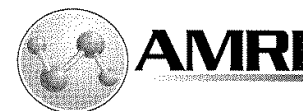

Name \_\_\_\_\_  
Date \_\_\_\_\_  
NB # \_\_\_\_\_

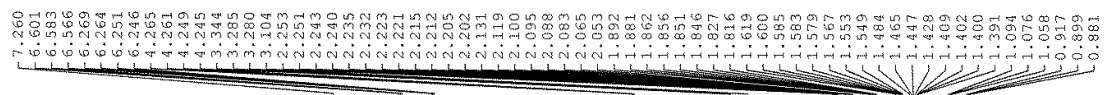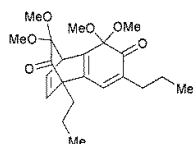

NAME SG-BCK-6Pr-Ardimer-DAIB  
EXPNO 10  
PROCNO 1  
Date\_ 20140829  
Time\_ 21.07  
INSTRUM spect  
PROBHD 5 mm PABBO BB-  
PULPROG zg30  
TD 65536  
SOLVENT CDCl3  
NS 16  
DS 2  
SWH 8012.820 Hz  
FIDRES 0.122266 Hz  
AQ 4.0894966 sec  
RG 45.2  
DW 62.400 usec  
DE 6.00 usec  
TE 300.0 K  
D1 1.00000000 sec  
TD0 1

===== CHANNEL f1 =====  
NUC1 1H  
P1 10.70 usec  
PL1 -2.00 dB  
PL1W 14.33185768 W  
SFO1 400.2330885 MHz  
SI 32768  
SF 400.2300116 MHz  
WDW EM  
SSB 0  
LB 0.30 Hz  
GB 0  
PC 1.00

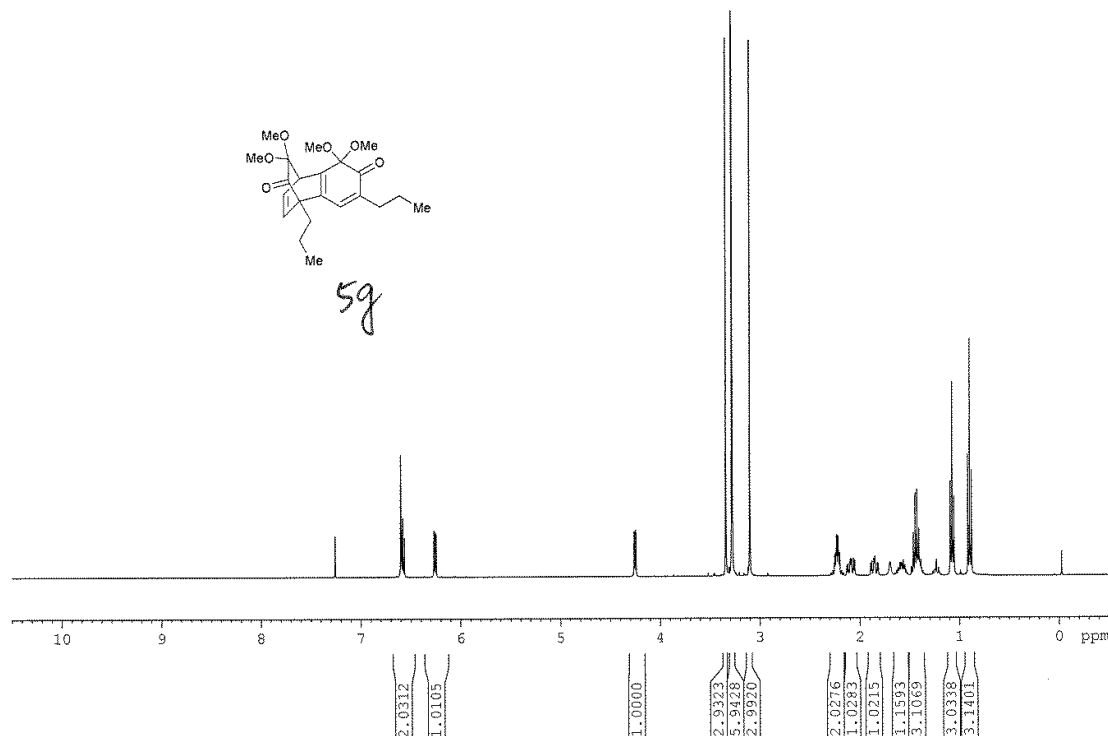

AMRI; SRC AV400  
location; 18

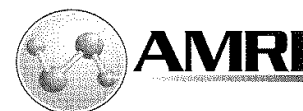

196.966  
195.451

145.684  
136.835  
136.771  
134.546  
131.593  
131.316

92.675  
91.221

77.318  
77.001  
76.883

59.649  
51.256  
50.893  
50.780  
49.593  
42.891

30.956  
28.331  
21.677  
17.983  
14.871  
13.783

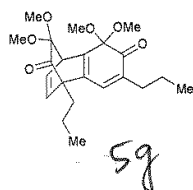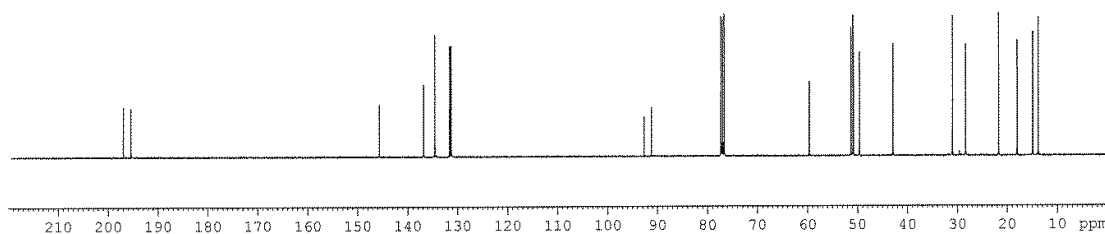

Name \_\_\_\_\_  
Date \_\_\_\_\_  
NB # \_\_\_\_\_

NAME SG-BCK-6Pr-Ardimer-DAIB  
EXPNO 11  
PROCNO 1  
Date\_ 20140829  
Time\_ 22.31  
INSTRUM spect  
PROBHD 5 mm PABBO BB-  
PULPROG zgpg30  
TD 65536  
SOLVENT CDCl3  
NS 2560  
DS 4  
SWH 24039.461 Hz  
FIDRES 0.366798 Hz  
AQ 1.3631988 sec  
RG 101  
DW 20.800 usec  
DE 6.50 usec  
TE 300.0 K  
D1 0.50000000 sec  
D11 0.03000000 sec  
TD0 1

===== CHANNEL f1 =====  
NUC1 13C  
P1 8.60 usec  
PL1 -1.00 dB  
PL1W 44.58811569 W  
SFO1 100.6479769 MHz

===== CHANNEL f2 =====  
CPDPRG2 waltz16  
NUC2 1H  
PCPD2 80.00 usec  
PL2 -2.00 dB  
PL12 16.47 dB  
PL13 15.72 dB  
PL2W 14.33185768 W  
PL12W 0.25662708 W  
PL13W 0.24227159 W  
SFO2 400.2316009 MHz  
SI 32768  
SF 100.6379184 MHz  
WDW EM  
SSB 0  
LB 1.00 Hz  
GB 0  
PC 1.40

7.260  
7.053  
7.026  
6.984  
6.977  
6.821  
6.815  
6.801  
6.796  
6.790  
6.776  
6.770  
6.745  
6.738  
6.724  
6.719  
6.714  
6.699  
6.693  
5.832  
4.881  
4.875  
4.861  
4.855  
4.516  
4.510  
4.496  
4.490  
3.846

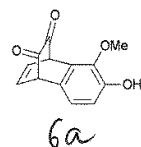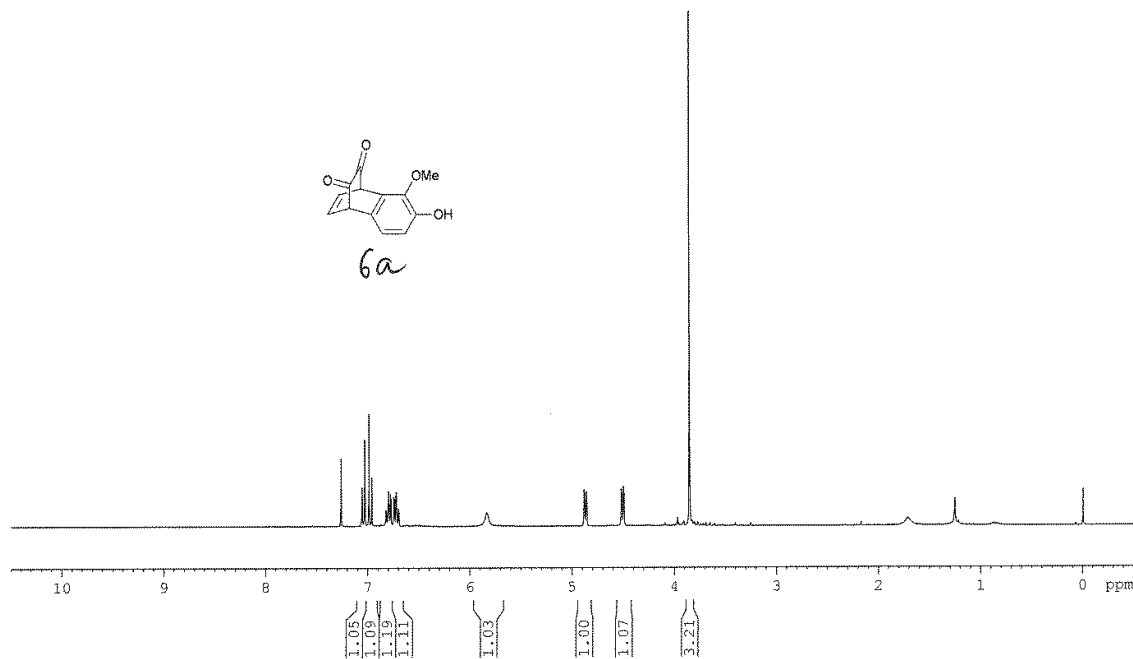

NAME SG-BCK-ArGD-dione  
EXPNO 10  
PROCNO 1  
Date 20140711  
Time 20.10  
INSTRUM spect  
PROBHD 5 mm QNP 1H/13  
PULPROG zg30  
TD 32768  
SOLVENT CDCl3  
NS 16  
DS 2  
SWH 5995.204 Hz  
FIDRES 0.182959 Hz  
AQ 2.7329011 sec  
RG 406.4  
DW 83.400 usec  
DE 6.00 usec  
TE 300.0 K  
D1 1.00000000 sec  
MCREST 0.00000000 sec  
MCWRK 0.01500000 sec

===== CHANNEL f1 =====  
NUC1 1H  
P1 12.20 usec  
PL1 0.00 dB  
SFO1 300.1319508 MHz  
SI 16384  
SF 300.1300063 MHz  
WDW EM  
SSB 0  
LB 0.30 Hz  
GB 0  
PC 1.00

Name \_\_\_\_\_

Date \_\_\_\_\_

NB # \_\_\_\_\_

AMRI; SRC  
location; 15

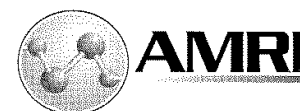

181.832  
181.446

149.726  
143.752

132.905  
130.963  
126.779  
126.398  
122.520  
116.982

77.425  
77.002  
76.578

62.865  
55.073  
50.160

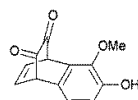

6a

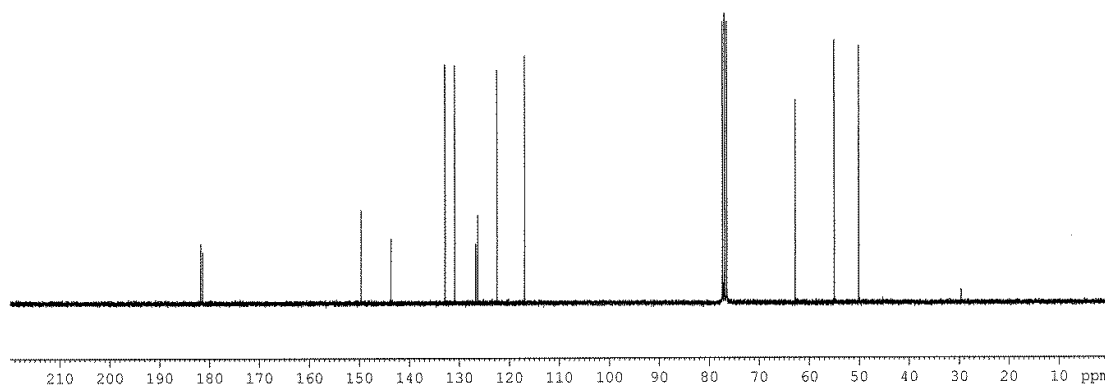

Name \_\_\_\_\_  
Date \_\_\_\_\_  
NB # \_\_\_\_\_

NAME SG-BCK-ArGD-dione  
EXPNO 11  
PROCNO 1  
Date 20140711  
Time 22.58  
INSTRUM spect  
PROBHD 5 mm QNP 1H/13  
PULPROG zgpg30  
TD 65536  
SOLVENT CDC13  
NS 5000  
DS 0  
SWH 22675.736 Hz  
FIDRES 0.346004 Hz  
AQ 1.4451188 sec  
RG 2580.3  
DW 22.050 usec  
DE 6.00 usec  
TE 300.0 K  
D1 0.50000000 sec  
d11 0.03000000 sec  
DELTA 0.40000001 sec  
MCREST 0.00000000 sec  
MCWRR 0.01500000 sec

===== CHANNEL f1 =====  
NUC1 13C  
P1 8.00 usec  
PL1 -2.00 dB  
SFO1 75.4767751 MHz

===== CHANNEL f2 =====  
CPDPRG2 waltz16  
NUC2 1H  
PCPD2 80.00 usec  
PL2 0.00 dB  
PL12 16.33 dB  
PL13 16.00 dB  
SFO2 300.1315007 MHz  
SI 131072  
SF 75.4677510 MHz  
WDW EM  
SSB 0  
LB 0.30 Hz  
GB 0  
PC 1.40

AMRI; SRC AV400  
location; 18

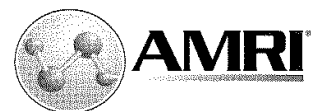

Name \_\_\_\_\_  
Date \_\_\_\_\_  
NB # \_\_\_\_\_

7.260  
6.804  
6.271  
6.267  
6.262  
6.258  
6.255  
6.251  
6.246  
6.242  
5.720  
5.713  
4.740  
4.724  
4.470  
4.464  
3.807  
2.627  
2.609  
2.591  
2.587  
2.570  
2.552  
2.538  
2.535  
2.383  
2.338  
2.334  
2.331  
2.317  
2.315  
1.603  
1.584  
1.582  
1.577  
1.574  
1.565  
1.559  
1.556  
1.551  
1.546  
1.542  
1.538  
1.533  
1.528  
1.520  
1.515

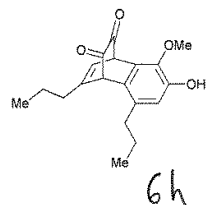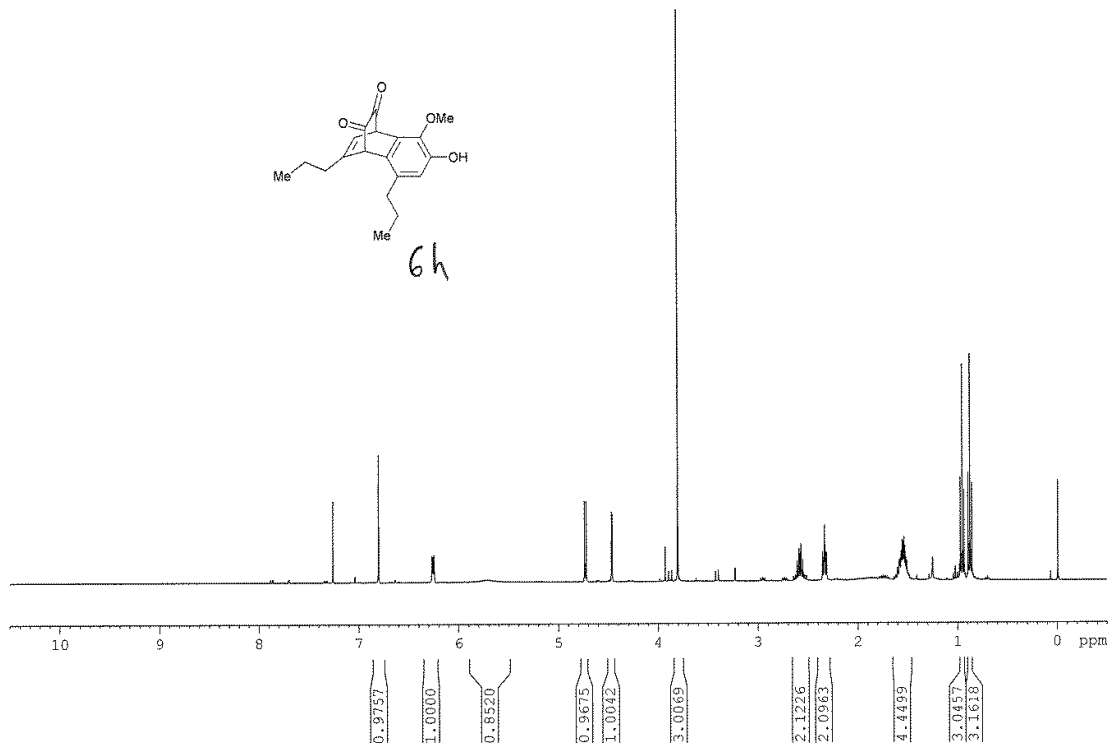

NAME SG-BCK-5Pr-Dione  
EXPNO 10  
PROCNO 1  
Date 20140823  
Time 4.40  
INSTRUM spect  
PROBHD 5 mm F4BBO BB-  
PULPROG zg30  
TD 65536  
SOLVENT CDCl3  
NS 16  
DS 2  
SWH 8012.820 Hz  
FIDRES 0.122266 Hz  
AQ 4.0894966 sec  
RG 90.5  
DW 62.400 usec  
DE 6.00 usec  
TE 300.0 K  
D1 1.00000000 sec  
TD0 1

===== CHANNEL f1 =====  
NUC1 1H  
P1 10.70 usec  
PL1 -2.00 dB  
PL1W 14.33185768 W  
SFO1 400.2330885 MHz  
SI 32768  
SF 400.2300119 MHz  
WDW EM  
SSB 0  
LB 0.30 Hz  
GB 0  
PC 1.00

AMRI; SRC AV400  
location; 18

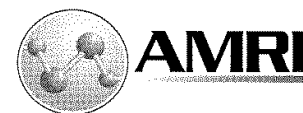

183.037  
182.566

148.938  
147.947  
141.581  
136.189  
127.621  
124.669  
123.010  
117.252

77.318  
77.001  
76.863

62.840  
56.075  
49.536

36.161  
34.326

24.494  
20.278  
13.835  
13.531

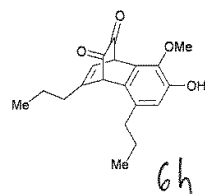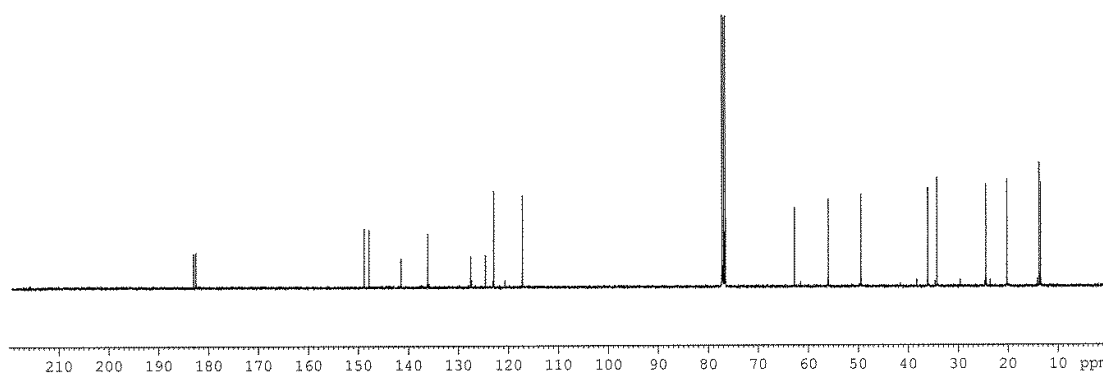

Name \_\_\_\_\_  
Date \_\_\_\_\_  
NB # \_\_\_\_\_

NAME SG-BCK-5Pr-Dione  
EXPNO 11  
PROCNO 1  
Date\_ 20140823  
Time\_ 6.02  
INSTRUM spect  
PROBHD 5 mm PABBO BB-  
PULPROG zgpg30  
TD 65536  
SOLVENT CDCl3  
NS 2500  
DS 4  
SWH 24039.461 Hz  
FIDRES 0.366798 Hz  
AQ 1.3631988 sec  
RG 101  
DW 20.800 usec  
DE 6.50 usec  
TE 300.0 K  
D1 0.50000000 sec  
D11 0.03000000 sec  
TD0 1

===== CHANNEL f1 =====  
NUC1 13C  
P1 8.60 usec  
PL1 -1.00 dB  
PL1W 44.58811569 W  
SFO1 100.6479769 MHz

===== CHANNEL f2 =====  
CPDPRG2 waltz16  
NUC2 1H  
PCPD2 80.00 usec  
PL2 -2.00 dB  
PL12 15.47 dB  
PL13 15.72 dB  
PL2W 14.33185768 W  
PL12W 0.25662708 W  
PL13W 0.24227159 W  
SFO2 400.2316009 MHz  
SI 32768  
SF 100.6379167 MHz  
WDW EM  
SSB 0  
LB 1.00 Hz  
GB 0  
PC 1.40

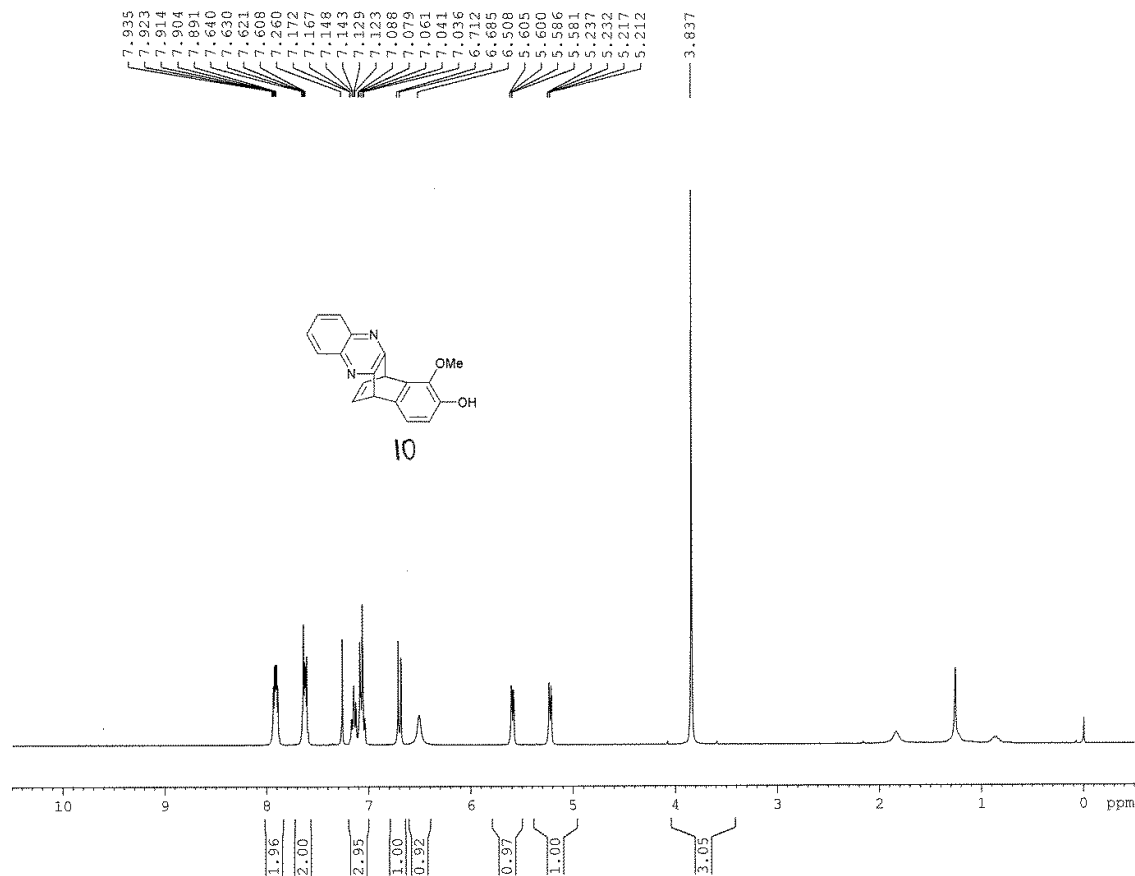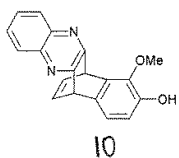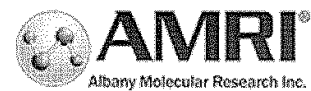

```

NAME      5G-BCK-ArGD-dione-phenylenediamine
EXPNO     1
PROCNO    1
Date_     20140712
Time      1.18
INSTRUM   spect
PROBHD    5 mm QNP 1H/13
PULPROG   zg30
TD         32768
SOLVENT   CDCl3
NS         16
DS         2
SWH        5995.204 Hz
FIDRES     0.102959 Hz
AQ         2.7329011 sec
RG         322.5
DM         83.400 usec
DE         6.00 usec
TE         300.0 K
D1         1.00000000 sec
d11        0.00000000 sec
MCREST    0.01500000 sec
===== CHANNEL f1 =====
NUC1       13C
P1         12.20 usec
PL1        0.30 dB
SFO1       300.1319508 MHz
ST         16394
SF         300.1360063 MHz
WDW        EM
SSB        0
LB         0.30 Hz
GB         0
PC         1.00
  
```

Name \_\_\_\_\_

Date \_\_\_\_\_

NB # \_\_\_\_\_

# AMRI; SRC location; 15

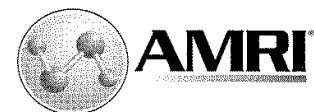

Name \_\_\_\_\_

Date \_\_\_\_\_

NB # \_\_\_\_\_

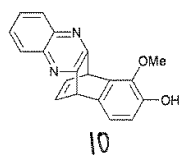

158.036  
157.299  
147.484  
143.613  
139.159  
138.525  
136.968  
135.126  
134.586  
129.054  
128.957  
128.286  
120.818  
113.065  
  
77.424  
77.000  
76.576  
  
62.592  
  
51.459  
46.437

NAME SG-BCK-ArGD-dione-phenylenediamine  
EXPNO 11  
PROCNO 1  
Date\_ 20140712  
Time 4.06  
INSTRUM spect  
PROBHD 5 mm QNP 1H/13  
PULPROG zgpg30  
TD 65536  
SOLVENT CDCl3  
NS 5000  
DS 0  
SWH 22675.736 Hz  
FIDRES 0.346004 Hz  
AQ 1.4451188 sec  
RG 1824.6  
DM 22.050 usec  
DE 6.00 usec  
TE 300.0 K  
D1 0.59000000 sec  
d11 0.03000000 sec  
DELTA 0.40000001 sec  
MCREST 0.00000000 sec  
MCWRK 0.01500000 sec

===== CHANNEL f1 =====  
NUC1 13C  
P1 8.00 usec  
PL1 -2.00 dB  
SFO1 75.467751 MHz

===== CHANNEL f2 =====  
CPDPRG2 waltz16  
NUC2 1H  
PCPD2 80.00 usec  
PL2 0.00 dB  
PL12 16.33 dB  
PL13 16.00 dB  
SFO2 300.1315007 MHz  
SI 131072  
SF 75.4677511 MHz  
WDW EM  
SSB 0  
LB 0.30 Hz  
GB 0  
PC 1.40

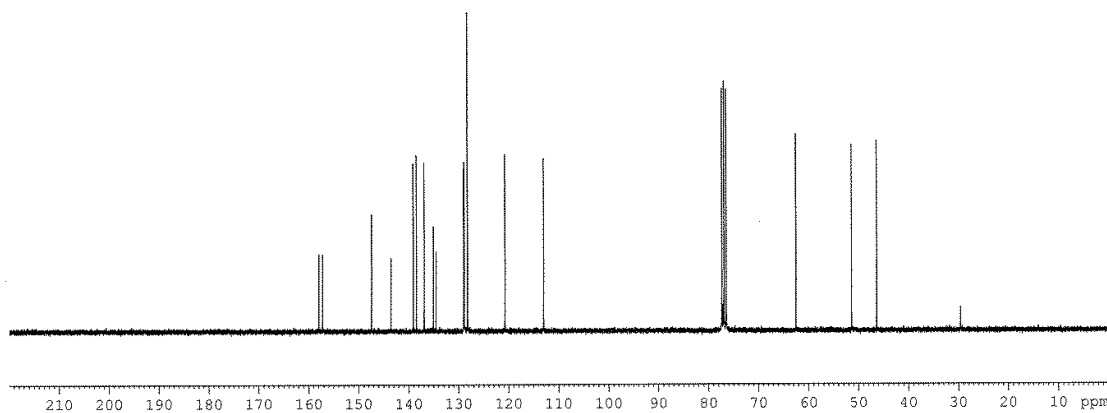

AMRI SRC  
location; 17

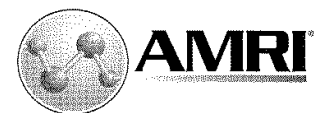

Name \_\_\_\_\_  
Date \_\_\_\_\_  
NB # \_\_\_\_\_

7.647  
7.633  
7.260  
7.156  
7.152  
7.143  
7.138  
7.134  
7.123  
7.119  
7.078  
7.067  
7.064  
7.058  
7.053  
7.049  
7.046  
7.035  
7.031  
6.684  
6.664  
5.873  
5.556  
5.552  
5.541  
5.537  
5.188  
5.184  
5.173  
5.169  
3.890

2.419

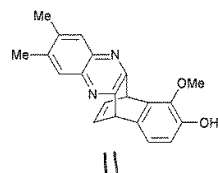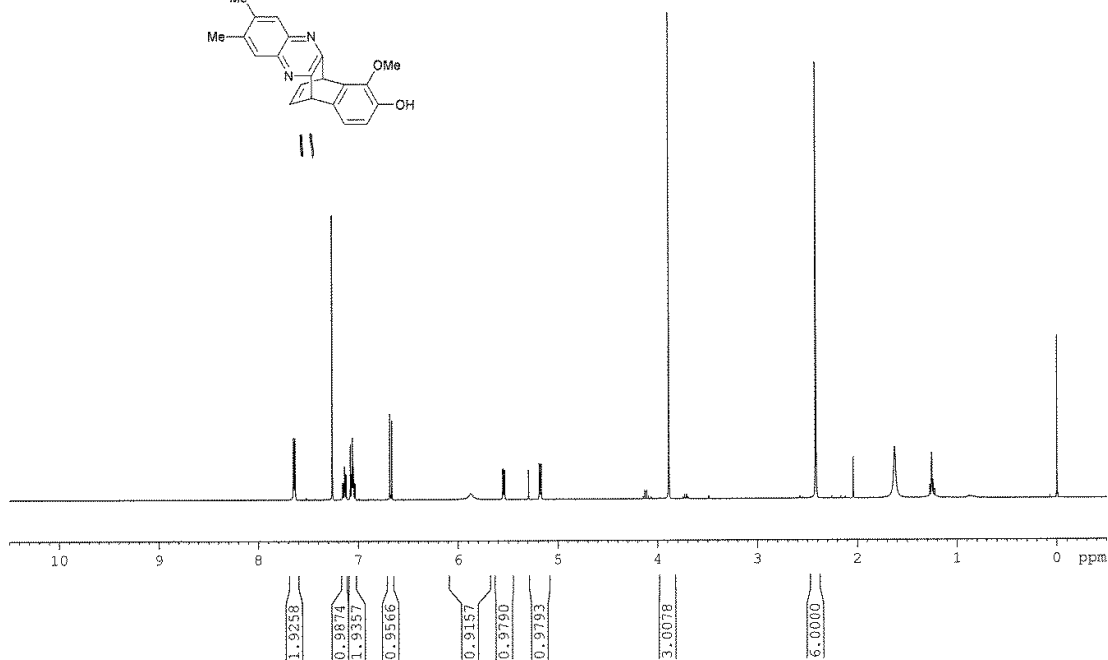

NAME SG-BCK-ArGD-diMedianiline  
EXPNO 10  
PROCNO 1  
Date\_ 20140714  
Time\_ 23.04  
INSTRUM spect  
PROBHD 5 mm F4BBO BB-  
PULPROG zg30  
TD 65536  
SOLVENT CDCl3  
NS 16  
DS 2  
SWH 8012.820 Hz  
FIDRES 0.122266 Hz  
AQ 4.0894966 sec  
RG 228.1  
DW 62.400 usec  
DE 6.50 usec  
TE 300.0 K  
D1 1.00000000 sec  
TD0 1

===== CHANNEL f1 =====  
NUC1 1H  
P1 10.70 usec  
PL1 -3.00 dB  
PL1W 19.34582710 W  
SFO1 400.1318542 MHz  
SI 32768  
SF 400.1300095 MHz  
WDW EM  
SSB 0  
LB 0.30 Hz  
GB 0  
PC 1.00

# AMRI SRC location; 17

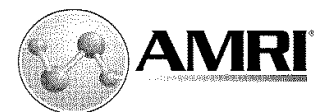

Name \_\_\_\_\_  
Date \_\_\_\_\_  
NB # \_\_\_\_\_

NAME SG-BCK-ArGD-diMedianiline  
EXPNO 11  
PROCNO 1  
Date 20140715  
Time 1.01  
INSTRUM spect  
PROBHD 5 mm PABBO BB-  
PULPROG zgpg30  
TD 65536  
SOLVENT CDCl3  
NS 2000  
DS 4  
SWH 23980.814 Hz  
FIDRES 0.365918 Hz  
AQ 1.3664756 sec  
RG 18390.4  
DW 20.850 usec  
DE 6.50 usec  
TE 300.0 K  
D1 2.00000000 sec  
D11 0.03000000 sec  
TD0 1

===== CHANNEL f1 =====  
NUC1 13C  
P1 7.10 usec  
PL1 -4.00 dB  
PL1W 82.02445221 W  
SFO1 100.6228298 MHz

===== CHANNEL f2 =====  
CPDPRG2 waltz16  
NUC2 1H  
PCPD2 80.00 usec  
PL2 -3.00 dB  
PL12 14.47 dB  
PL13 15.06 dB  
PL2W 19.34582710 W  
PL12W 0.34640750 W  
PL13W 0.30240381 W  
SFO2 400.1316005 MHz  
SI 32768  
SF 100.6127699 MHz  
WDW EM  
SSB 0  
LB 1.00 Hz  
GB 0  
PC 1.40

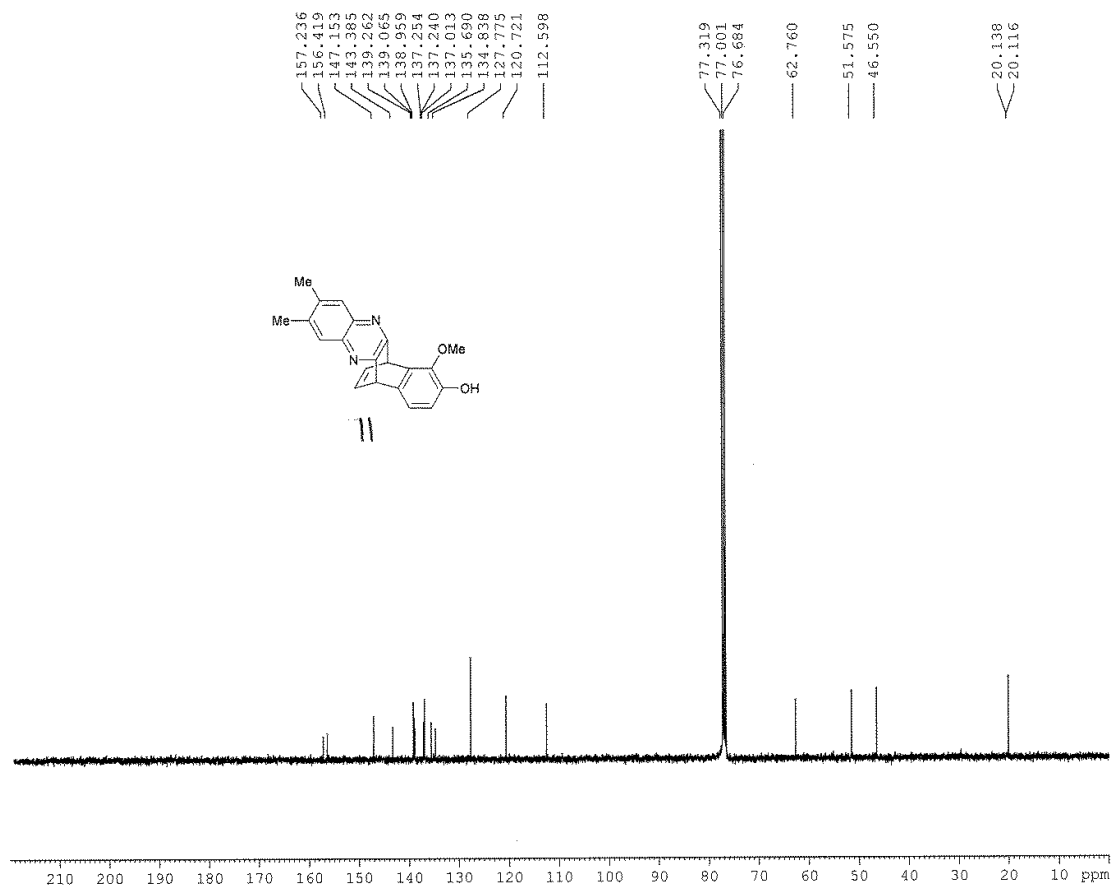

AMRI SRC  
location; 17

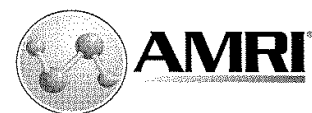

Name \_\_\_\_\_  
Date \_\_\_\_\_  
NB # \_\_\_\_\_

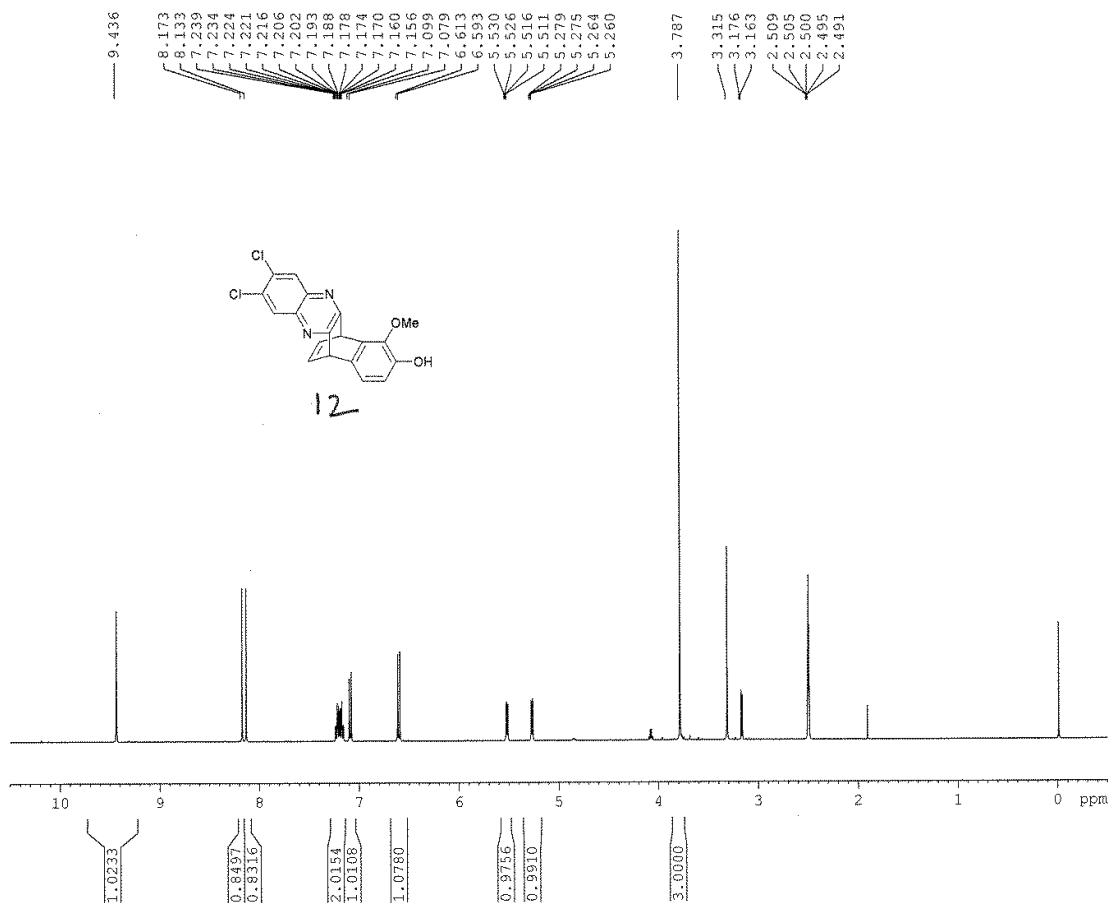

NAME SG-BCK-ArgD-d1Cl-dianiline  
EXPNO 10  
PROCNO 1  
Date\_ 20140715  
Time\_ 3.22  
INSTRUM spect  
PROBHD 5 mm PABBO BB-  
PULPROG zg30  
TD 65536  
SOLVENT DMSO  
NS 16  
DS 2  
SWH 8012.820 Hz  
FIDRES 0.122266 Hz  
AQ 4.0894966 sec  
RG 181  
DW 62.400 usec  
DE 6.50 usec  
TE 300.0 K  
D1 1.00000000 sec  
TD0 1

===== CRANNEL f1 =====

NUC1 1H  
P1 10.70 usec  
PL1 -3.00 dB  
PL1W 19.34582710 W  
SF01 400.1318542 MHz  
SI 32768  
SF 400.1300031 MHz  
WDW EM  
SSB 0  
LB 0.30 Hz  
GB 0  
PC 1.00

# AMRI SRC location; 17

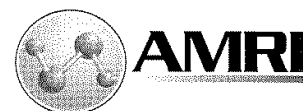

Name \_\_\_\_\_  
Date \_\_\_\_\_  
NB # \_\_\_\_\_

159.405  
158.938  
148.574  
143.767  
138.855  
137.236  
137.132  
134.398  
132.985  
131.504  
131.437  
129.024  
128.921  
120.334  
114.056

61.020  
50.134  
45.345  
40.149  
39.841  
38.732  
38.523  
38.313  
39.106  
38.898

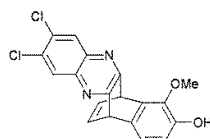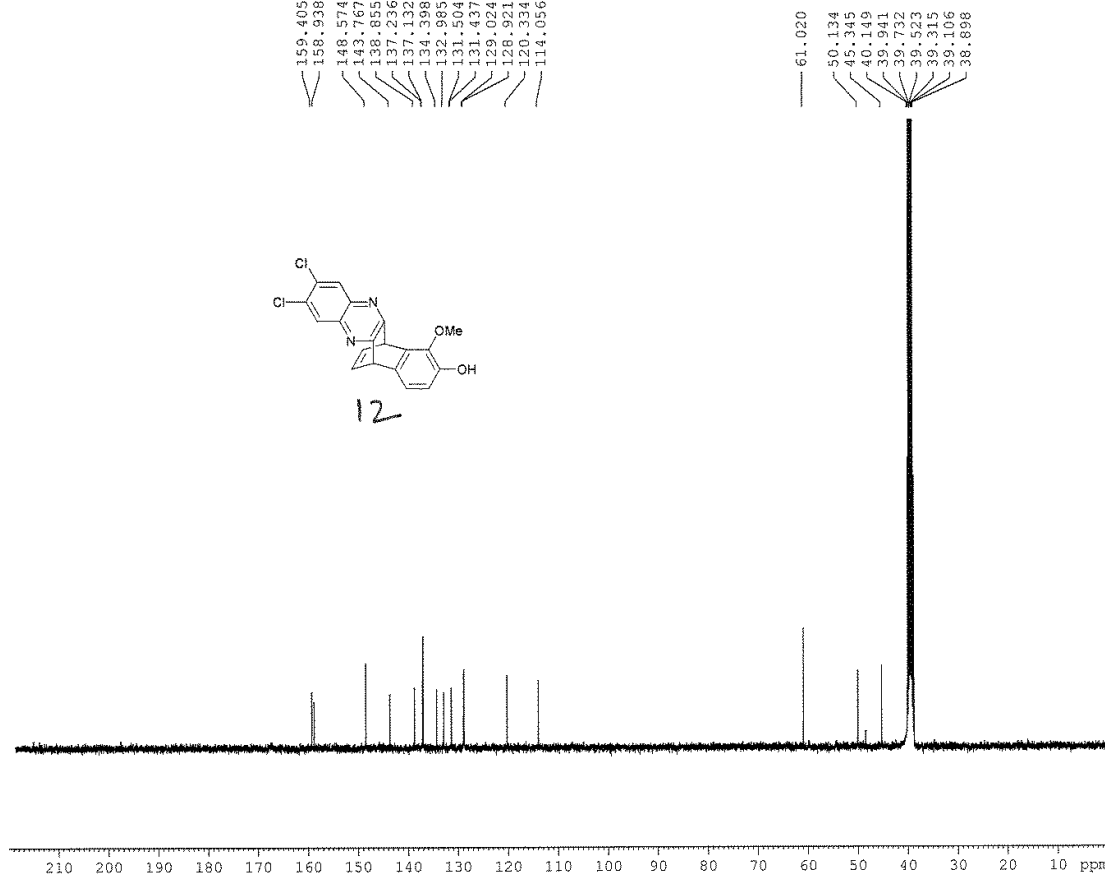

NAME SG-BCK-ArGD-diCl-dianiline  
EXENO 11  
PROCNO 1  
Date 20140715  
Time 5.19  
INSTRUM spect  
PROBHD 5 mm PABBO BB-  
PULPROG zgpg30  
TD 65536  
SOLVENT DMSO  
NS 2000  
DS 4  
SWH 23980.814 Hz  
FIDRES 0.365918 Hz  
AQ 1.3664756 sec  
RG 9195.2  
DW 20.850 usec  
DE 6.50 usec  
TE 300.0 K  
D1 2.00000000 sec  
D11 0.03000000 sec  
TD0 1

CHANNEL f1  
NUC1 13C  
P1 7.10 usec  
PL1 -4.00 dB  
PL1W 82.02445221 W  
SFO1 100.6228298 MHz

CHANNEL f2  
CPDPRG2 waltz16  
NUC2 1H  
PCPD2 80.00 usec  
PL2 -3.00 dB  
PL12 14.47 dB  
PL13 15.06 dB  
PL2W 19.34582710 W  
PL12W 0.34640750 W  
PL13W 0.30240381 W  
SFO2 400.1316005 MHz  
SI 32768  
SF 100.6128179 MHz  
WDW EM  
SSB 0  
LB 1.00 Hz  
GB 0  
PC 1.40

AMRI; SRC AV400  
location; 18

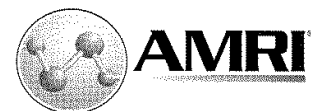

Name \_\_\_\_\_  
Date \_\_\_\_\_  
NB # \_\_\_\_\_

7.923  
7.917  
7.912  
7.905  
7.899  
7.894  
7.830  
7.619  
7.612  
7.607  
7.605  
7.600  
7.594  
7.260  
6.576  
6.572  
6.568  
6.564  
6.561  
6.557  
6.549  
6.299  
5.460  
5.444  
5.196  
5.192  
3.824  
2.714  
2.695  
2.675  
2.355  
2.352  
2.337  
2.333  
2.318  
2.314  
1.685  
1.669  
1.667  
1.651  
1.632  
1.621  
1.613  
1.602  
1.594  
1.584  
1.565  
1.559  
1.549  
1.543  
1.541  
1.530  
1.525  
1.506  
1.486  
1.470  
1.457

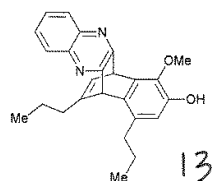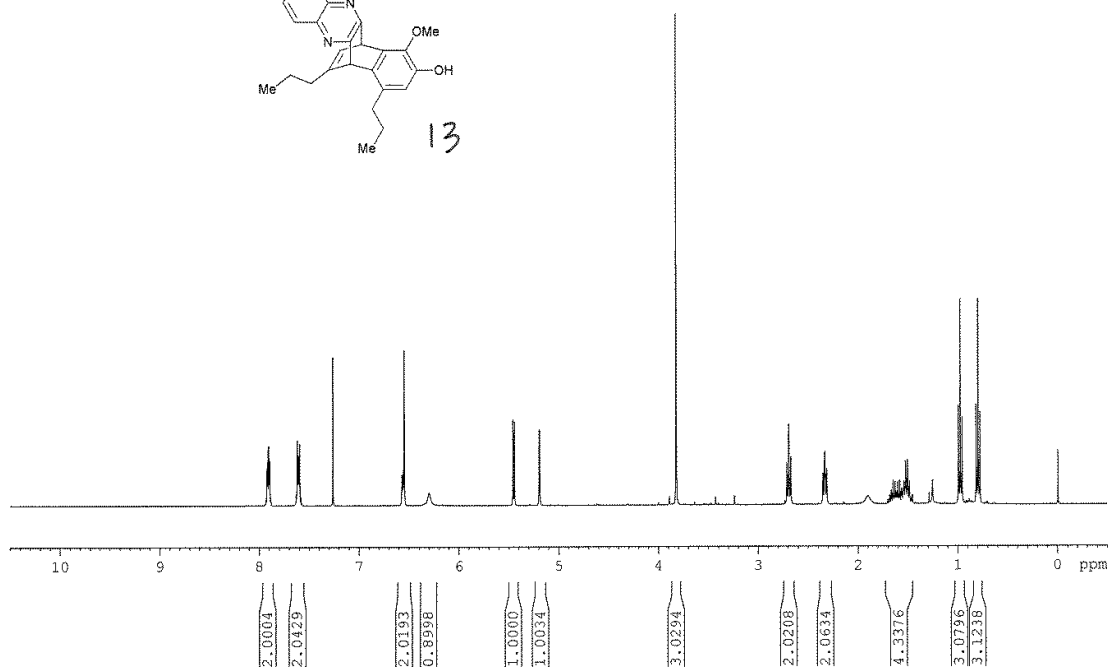

NAME SG-BCK-5-Pr-Dione-Phdiamine  
EXPNO 10  
PROCNO 1  
Date\_ 20140923  
Time\_ 8.38  
INSTRUM spect  
PROBHD 5 mm PABBO BB-  
PULPROG zg30  
TD 65536  
SOLVENT CDC13  
NS 16  
DS 2  
SWH 8012.820 Hz  
FIDRES 0.122266 Hz  
AQ 4.0894966 sec  
RG 71.8  
DW 62.400 usec  
DE 6.00 usec  
TE 300.0 K  
D1 1.00000000 sec  
TD0 1

===== CHANNEL f1 =====  
NUC1 1H  
P1 10.70 usec  
PL1 -2.00 dB  
PL1W 14.33185768 W  
SFO1 400.2330885 MHz  
SI 32768  
SF 400.2300118 MHz  
WDW EM  
SSB 0  
LB 0.30 Hz  
GB 0  
PC 1.00

AMRI; SRC AV400  
location; 18

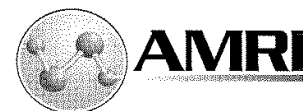

Name \_\_\_\_\_  
Date \_\_\_\_\_  
NB # \_\_\_\_\_

158.511  
158.244  
152.573  
146.784  
141.385  
138.604  
135.151  
134.472  
132.853  
128.840  
128.750  
128.717  
128.291  
128.240  
113.638

77.319  
77.001  
76.883

62.592

52.314

45.995

35.770  
34.476

24.657

20.210

14.014  
13.653

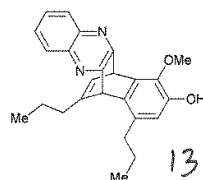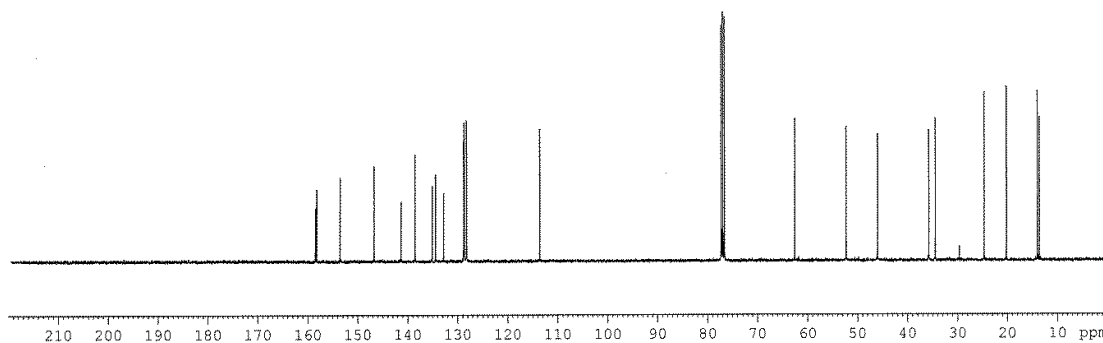

NAME SG-BCK-5-Pr-Dione-Phdiamine  
EXPNO 11  
PROCNO 1  
Date\_ 20140823  
Time\_ 9.44  
INSTRUM spect  
PROBHD 5 mm PABBO BB-  
PULPROG zgpg30  
TD 65536  
SOLVENT CDC13  
NS 2000  
DS 4  
SWH 24038.461 Hz  
FIDRES 0.366798 Hz  
AQ 1.3631988 sec  
RG 101  
DW 20.800 usec  
DE 6.50 usec  
TE 300.0 K  
D1 0.50000000 sec  
D11 0.03000000 sec  
TD0 1

===== CHANNEL f1 =====  
NUC1 13C  
P1 8.60 usec  
PL1 -1.00 dB  
PL1W 44.58811569 W  
SFO1 100.6479769 MHz

===== CHANNEL f2 =====  
CPDPRG2 waltz16  
NUC2 1H  
PCPD2 80.00 usec  
PL2 -2.00 dB  
PL12 15.47 dB  
PL13 15.72 dB  
PL2W 14.33189768 W  
PL12W 0.25662708 W  
PL13W 0.24227159 W  
SFO2 400.2316009 MHz  
SI 32768  
SF 100.6379178 MHz  
WDW EM  
SSB 0  
LB 1.00 Hz  
GB 0  
PC 1.40

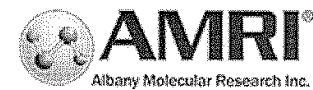

7.260  
6.957  
6.931  
6.758  
6.731  
6.614  
6.612  
6.607  
6.599  
6.595  
6.588  
6.586

4.742  
4.733  
4.726  
4.715  
4.273  
4.264  
4.263  
4.255  
4.248  
3.893  
3.848  
3.401  
3.262

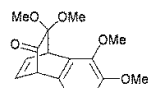

14

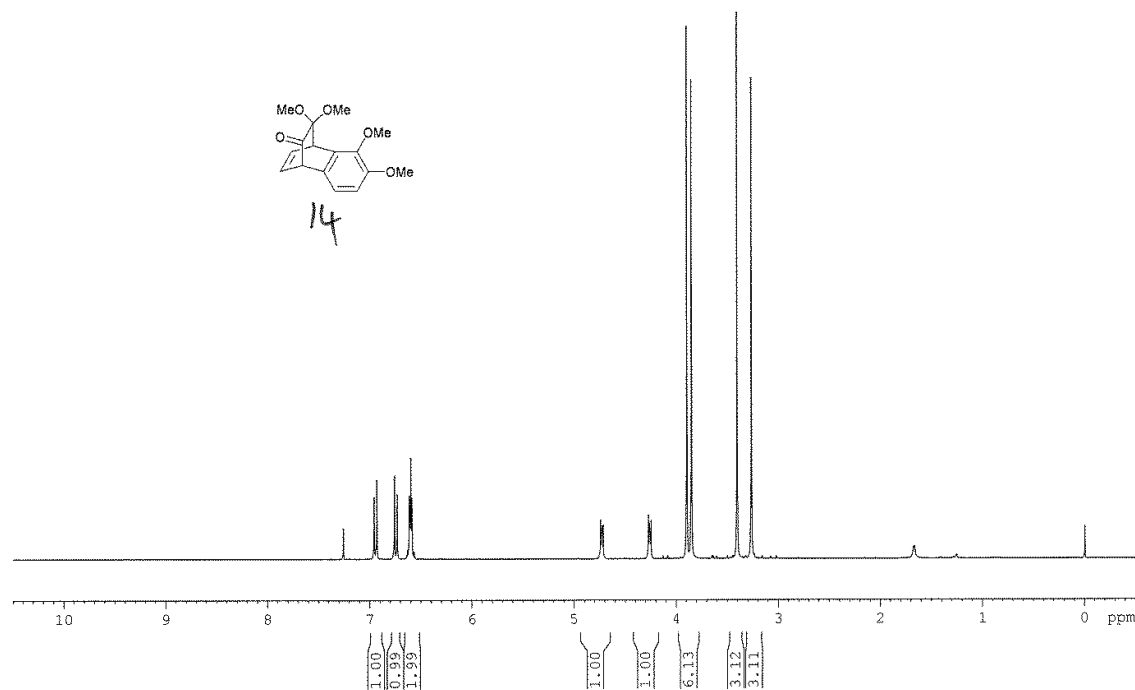

NAME SG-BCK-ArGD-MeI  
EXPNO 10  
PROCNO 1  
Date\_ 20140726  
Time 1.08  
INSTRUM spect  
PROBHD 5 mm QNP 1H/13  
PULPROG zgpg30  
TD 32768  
SOLVENT CDCl3  
NS 16  
DS 2  
SWH 5995.204 Hz  
FIDRES 0.182959 Hz  
AQ 2.7329011 sec  
RG 181  
DW 83.400 usec  
DE 6.00 usec  
TE 300.0 K  
D1 1.00000000 sec  
MCREST 0.00000000 sec  
MCWRK 0.01500000 sec

===== CHANNEL f1 =====  
NUC1 1H  
P1 12.20 usec  
PL1 0.00 dB  
SFO1 300.1319508 MHz  
SI 16384  
SF 300.1300063 MHz  
WDW EM  
SSB 0  
LB 0.30 Hz  
GB 0  
PC 1.00

Name \_\_\_\_\_  
Date \_\_\_\_\_  
NB # \_\_\_\_\_

# AMRI; SRC location; 15

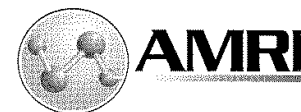

Name \_\_\_\_\_  
Date \_\_\_\_\_  
NB # \_\_\_\_\_

NAME SG-BCK-ArGD-MeI  
EXPNO 11  
PROCNO 1  
Date\_ 20140726  
Time\_ 2.33  
INSTRUM spect  
PROBHD 5 mm QNP 1H/13  
PULPROG zgpg30  
TD 65536  
SOLVENT CDC13  
NS 2500  
DS 0  
SWH 22675.736 Hz  
FIDRES 0.346004 Hz  
AQ 1.4451188 sec  
RG 1824.6  
DW 22.050 usec  
DE 6.00 usec  
TE 300.0 K  
D1 0.50000000 sec  
d11 0.03000000 sec  
DELTA 0.40000001 sec  
MCREST 0.00600000 sec  
MCWRK 0.01500000 sec

===== CHANNEL f1 =====  
NUC1 13C  
P1 8.00 usec  
PL1 -2.00 dB  
SFO1 75.4767751 MHz

===== CHANNEL f2 =====  
CPDPRG2 waltz16  
NUC2 1H  
PCPD2 80.00 usec  
PL2 0.00 dB  
PL12 16.33 dB  
PL13 16.00 dB  
SFO2 300.1315007 MHz  
SI 131072  
SF 75.4677532 MHz  
WDW EM  
SSB 0  
LB 0.30 Hz  
GB 0  
PC 1.40

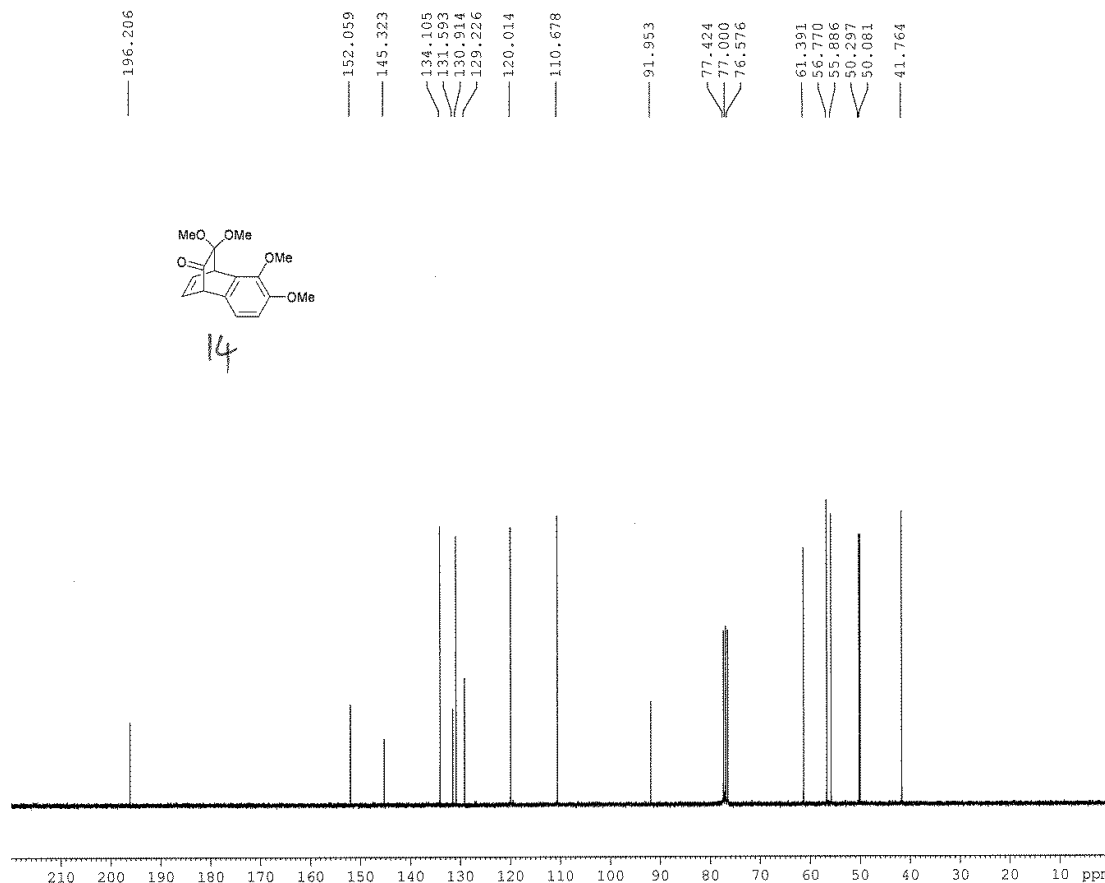

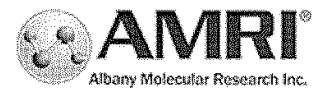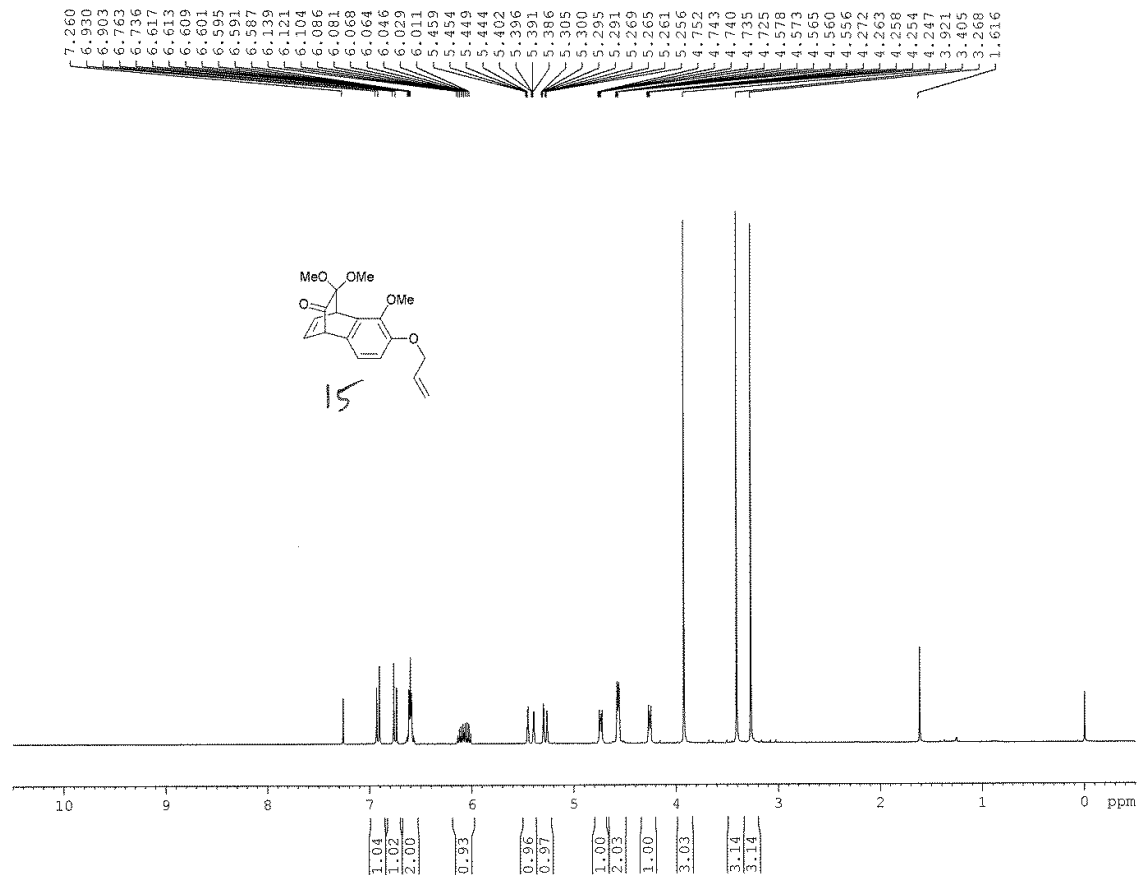

NAME SG-BCK-ArGD-Allyl  
 EXPNO 10  
 PROCNO 1  
 Date\_ 20140725  
 Time 18.26  
 INSTRUM spect  
 PROBHD 5 mm QNP 1H/13  
 PULPROG zg30  
 TD 32768  
 SOLVENT CDC13  
 NS 16  
 DS 2  
 SWH 5995.204 Hz  
 FIDRES 0.182959 Hz  
 AQ 2.7329011 sec  
 RG 181  
 DW 83.400 usec  
 DE 6.00 usec  
 TE 300.0 K  
 D1 1.00000000 sec  
 MCREST 0.00000000 sec  
 MCWRK 0.01500000 sec

===== CHANNEL f1 =====  
 NUC1 1H  
 P1 12.20 usec  
 PL1 0.00 dB  
 SFO1 300.1319508 MHz  
 SI 16384  
 SF 300.1300061 MHz  
 WDW EM  
 SSB 0  
 LB 0.30 Hz  
 GB 0  
 PC 1.00

Name \_\_\_\_\_

Date \_\_\_\_\_

NB # \_\_\_\_\_

AMRI; SRC  
location; 15

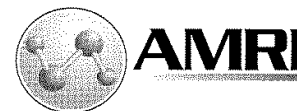

Name \_\_\_\_\_  
Date \_\_\_\_\_  
NB # \_\_\_\_\_

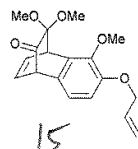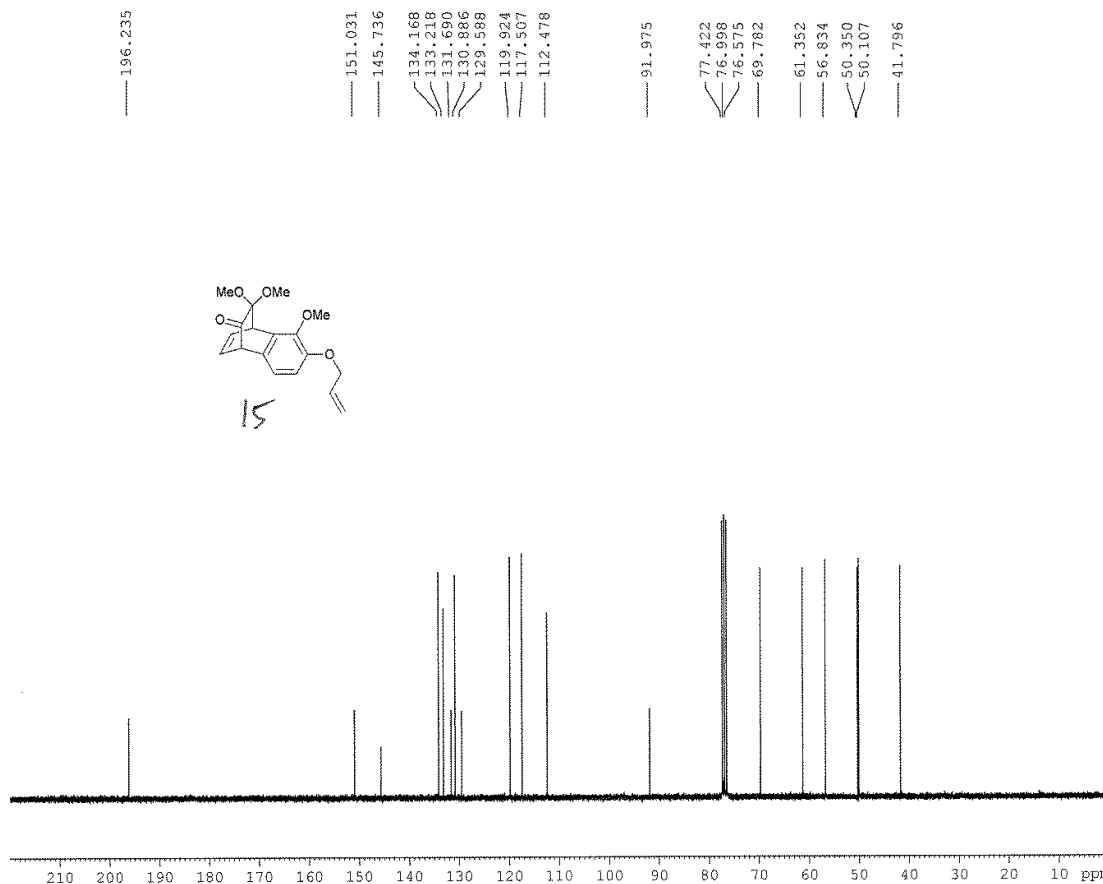

NAME SG-BCK-ArGD-Allyl  
EXPNO 31  
PROCNO 1  
Date\_ 20140729  
Time\_ 21.34  
INSTRUM spect  
PROBHD 5 mm QNP 1H/13  
PULPROG zgpg30  
TD 65536  
SOLVENT CDCl3  
NS 2500  
DS 0  
SWH 22675.736 Hz  
FIDRES 0.346004 Hz  
AQ 1.4451188 sec  
RG 2896.3  
DW 22.050 usec  
DE 6.00 usec  
TE 300.0 K  
D1 0.50000000 sec  
d11 0.03000000 sec  
DELTA 0.40000001 sec  
MCREST 0.00000000 sec  
MCWRK 0.01500000 sec

===== CHANNEL f1 =====  
NUC1 13C  
P1 8.00 usec  
PL1 -2.00 dB  
SFO1 75.4767751 MHz

===== CHANNEL f2 =====  
CPDPRG2 waltz16  
NUC2 1H  
PCPD2 80.00 usec  
PL2 0.00 dB  
PL12 16.33 dB  
PL13 16.00 dB  
SFO2 300.1315007 MHz  
SI 131072  
SF 75.4677510 MHz  
WDW EM  
SSB 0  
LB 0.30 Hz  
GB 0  
PC 1.40

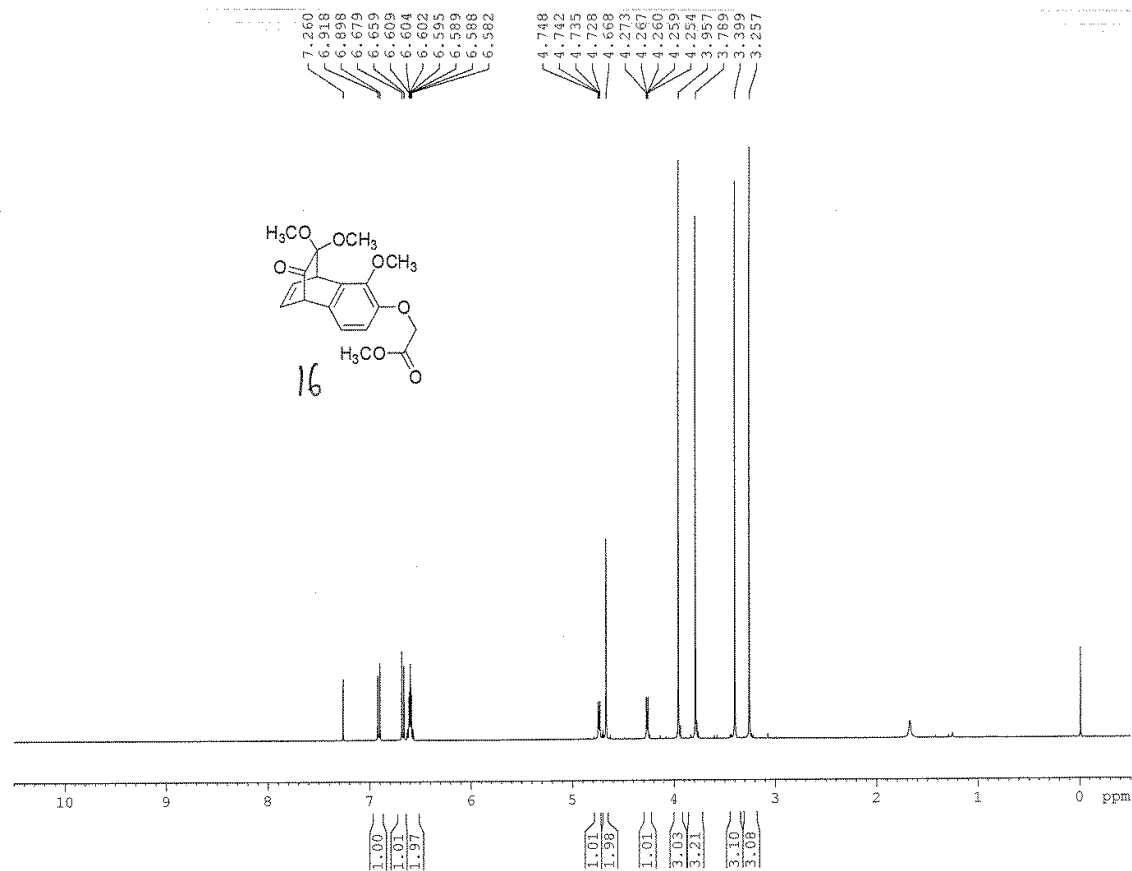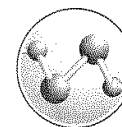

**AMRI**

Current Data Parameters  
NAME SG-ECK-ARGD-MeBrAc  
EXPNO 10  
PROCNO 1

F2 - Acquisition Parameters  
Date\_ 20140730  
Time 21.06  
INSTRUM spect  
PROBHD 5 mm F4BBO BB-  
PULPROG zg30  
TD 65536  
SOLVENT CDCl3  
NS 16  
DS 2  
SWH 8012.820 Hz  
FIDRES 0.122266 Hz  
AQ 4.0834966 sec  
RG 90.5  
DW 62.400 usec  
DE 6.00 usec  
TE 300.0 K  
D1 1.00000000 sec  
TD0 1

===== CHANNEL f1 =====  
NUC1 1H  
P1 10.70 usec  
PL1 -2.00 dB  
PL1W 14.33185768 W  
SFO1 400.2330885 MHz

F2 - Processing parameters  
SI 32768  
SF 400.2300118 MHz  
WDW EM  
SSB 0  
LB 0.30 Hz  
GB 0  
PC 1.00

Name \_\_\_\_\_

Date \_\_\_\_\_

NB # \_\_\_\_\_

AMRI; SRC AV400  
location; 18

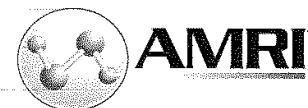

Name \_\_\_\_\_

Date \_\_\_\_\_

NB # \_\_\_\_\_

Current Data Parameters  
NAME SG-BCK-ARGD-MeErAc  
EXPNO 11  
PROCNO 1

F2 - Acquisition Parameters  
Date 20140730  
Time 22.28  
INSTRUM spect  
PROBHD 5 mm PABBO BB-  
PULPROG zgpg30  
TD 65536  
SOLVENT CDCl3  
NS 2500  
DS 4  
SWH 24038.461 Hz  
FIDRES 0.366798 Hz  
AQ 1.3631988 sec  
RG 144  
DM 20.800 usec  
DE 6.50 usec  
TE 300.0 K  
D1 0.50000000 sec  
D11 0.03000000 sec  
TD0 1

CHANNEL f1  
NUC1 13C  
P1 8.60 usec  
PL1 -1.00 dB  
PL1W 44.58811569 W  
SFO1 100.6279769 MHz

CHANNEL f2  
CPDPRG2 waltz16  
NUC2 1H  
PCPD2 80.00 usec  
PL2 -2.00 dB  
PL12 15.47 dB  
PL13 15.72 dB  
PL12W 14.33185768 W  
PL13W 0.25662708 W  
PL13W 0.24227159 W  
SFO2 400.2316009 MHz

F2 - Processing parameters  
SI 32768  
SF 100.6279179 MHz  
WDW EM  
SSB 0  
LB 1.00 Hz  
GB 0  
PC 1.40

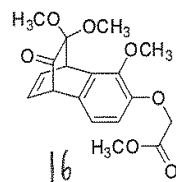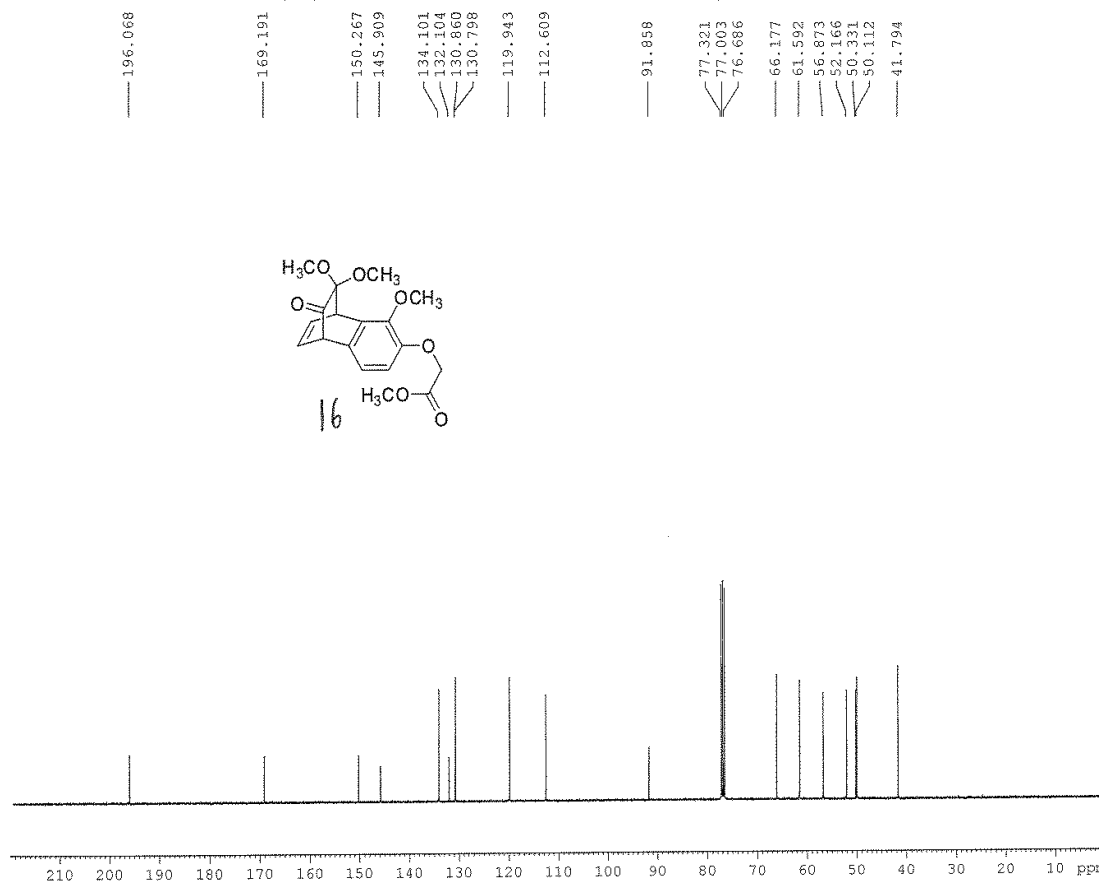



# AMRI; SRC location; 15

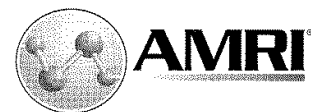

Name \_\_\_\_\_

Date \_\_\_\_\_

NB # \_\_\_\_\_

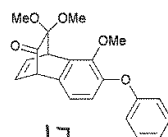

17

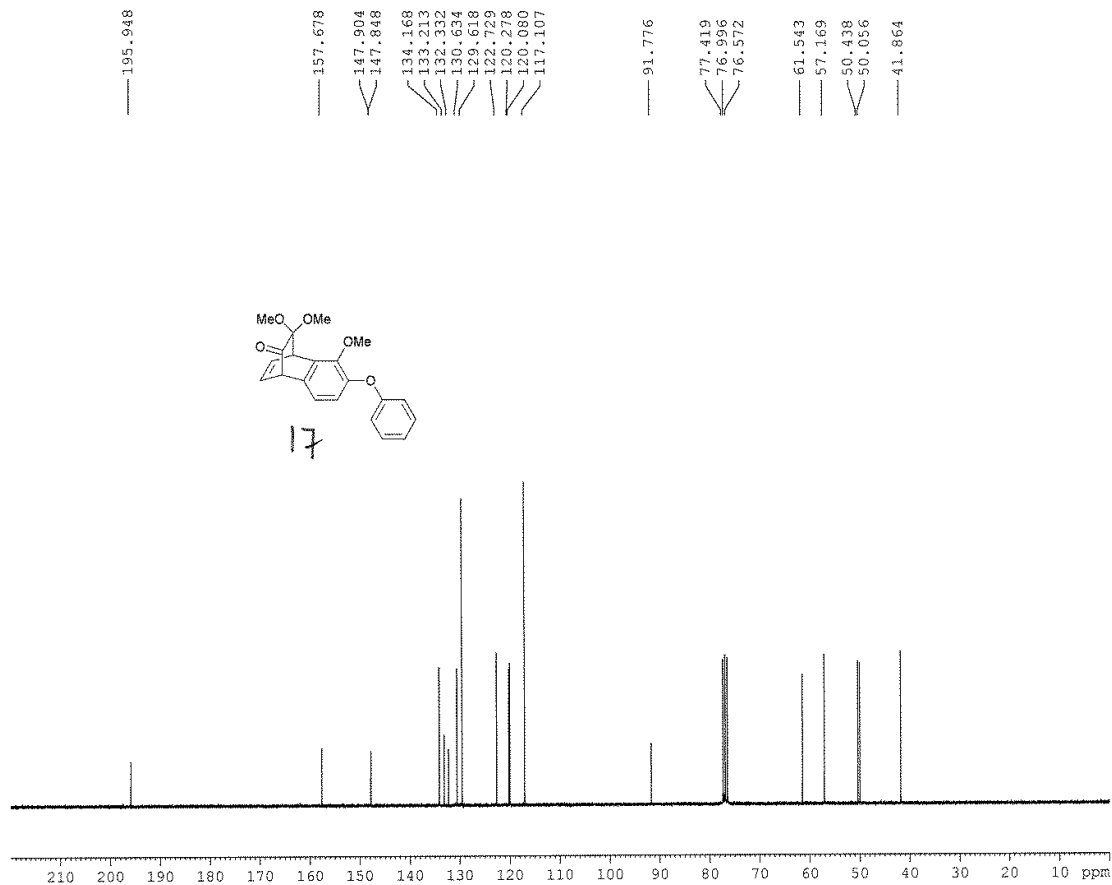

NAME SG-BCK-ArGD-chanlam-Ph  
EXPNO 21  
PROCNO 1  
Date\_ 20140722  
Time\_ 21.51  
INSTRUM spect  
PROBHD 5 mm QNP 1H/13  
PULPROG zgpg30  
TD 65536  
SOLVENT CDCl3  
NS 3000  
DS 0  
SWH 22675.736 Hz  
FIDRES 0.346004 Hz  
AQ 1.4451188 sec  
RG 2048  
DW 22.050 usec  
DE 6.00 usec  
TE 300.0 K  
D1 0.50000000 sec  
d11 0.03000000 sec  
DELTA 0.40000001 sec  
MCREST 0.00000000 sec  
MCWPK 0.01500000 sec

===== CHANNEL f1 =====  
NUC1 13C  
P1 8.00 usec  
PL1 -2.00 dB  
SFO1 75.4767751 MHz

===== CHANNEL f2 =====  
CPDPRG2 waltz16  
NUC2 1H  
PCPD2 80.00 usec  
PL2 0.00 dB  
PL12 16.33 dB  
PL13 16.00 dB  
SFO2 300.1315007 MHz  
SI 131072  
SF 75.4677518 MHz  
WDW EM  
SSB 0  
LB 0.30 Hz  
GB 0  
PC 1.40

AMRI; SRC AV400  
location; 18

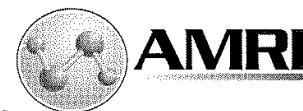

Name \_\_\_\_\_  
Date \_\_\_\_\_  
NB # \_\_\_\_\_

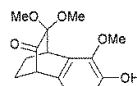

18

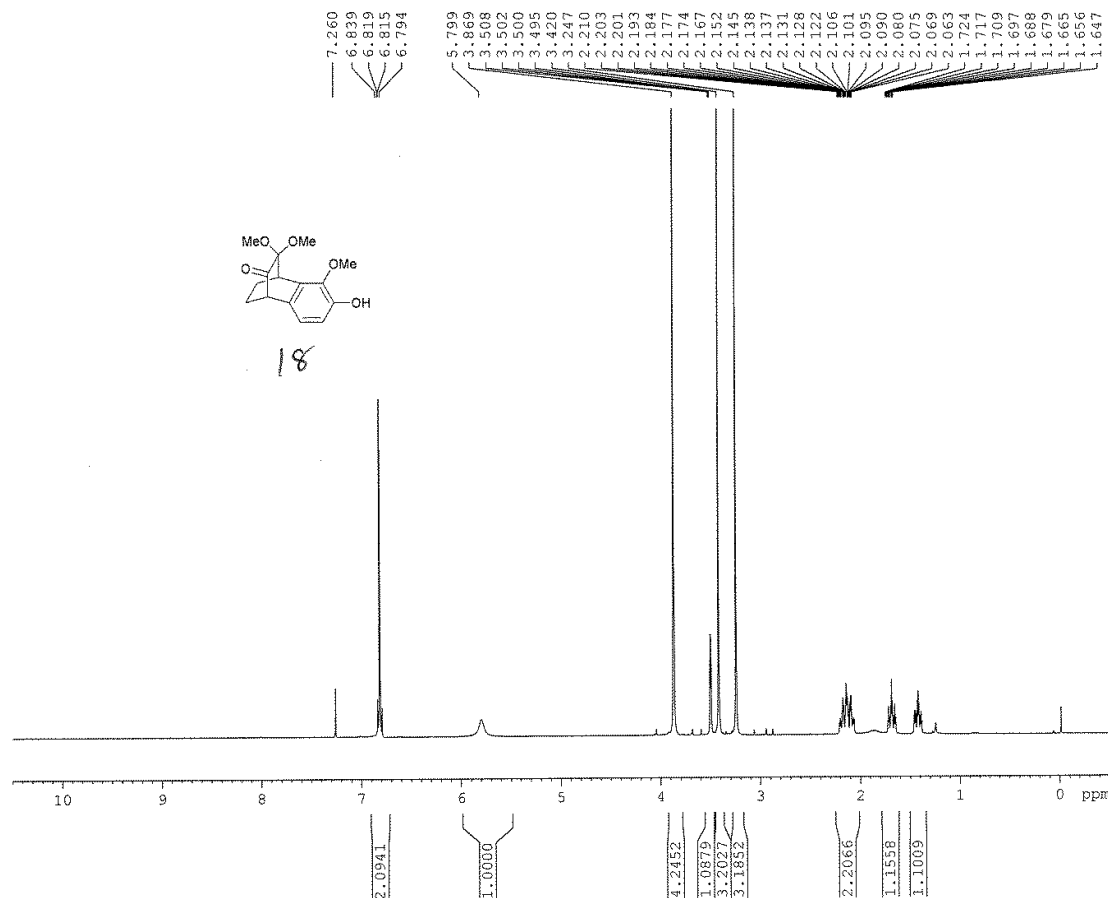

NAME SG-BCK-ArGD-PdC  
EXPNO 10  
PROCNO 1  
Date\_ 20140830  
Time\_ 0.18  
INSTRUM spect  
PROBHD 5 mm PABBO BB-  
PULPROG zg30  
TD 65536  
SOLVENT CDCl3  
NS 16  
DS 2  
SWH 8012.820 Hz  
FIDRES 0.122266 Hz  
AQ 4.0894966 sec  
RG 50.8  
DW 62.400 usec  
DE 6.00 usec  
TE 300.0 K  
D1 1.00000000 sec  
TDO 1

===== CHANNEL f1 =====  
NUC1 1H  
P1 10.70 usec  
PL1 -2.00 dB  
PL1W 14.33185768 W  
SFO1 400.2330885 MHz  
SI 32768  
SF 400.2300116 MHz  
WDW EM  
SSB 0  
LB 0.30 Hz  
GB 0  
PC 1.00

AMRI; SRC AV400  
location; 18

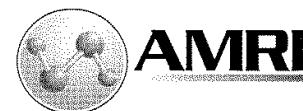

Name \_\_\_\_\_  
Date \_\_\_\_\_  
NB # \_\_\_\_\_

NAME SG-BCK-ArGD-PdC  
EXPNO 12  
PROCNO 1  
Date\_ 20140830  
Time\_ 1.42  
INSTRUM spect  
PROBHD 5 mm PABBO BB-  
PULPROG zgpg30  
TD 65536  
SOLVENT CDCl3  
NS 2560  
DS 4  
SWH 24038.461 Hz  
FIDRES 0.366798 Hz  
AQ 1.3631988 sec  
RG 101  
DW 20.800 usec  
DE 6.50 usec  
TE 300.0 K  
D1 0.50000000 sec  
D11 0.03000000 sec  
TD0 1

===== CHANNEL f1 =====  
NUC1 13C  
P1 8.60 usec  
PL1 -1.00 dB  
PL1W 44.58811569 W  
SFO1 100.6479769 MHz

===== CHANNEL f2 =====  
CPDPRG2 waltz16  
NUC2 1H  
PCPD2 80.00 usec  
PL2 -2.00 dB  
PL12 15.47 dB  
PL13 15.72 dB  
PL2W 14.33185768 W  
PL12W 0.25662708 W  
PL13W 0.24227159 W  
SFO2 400.2216003 MHz  
SI 32768  
SF 100.6379210 MHz  
WDW EM  
SSB 0  
LB 1.00 Hz  
GB 0  
PC 1.40

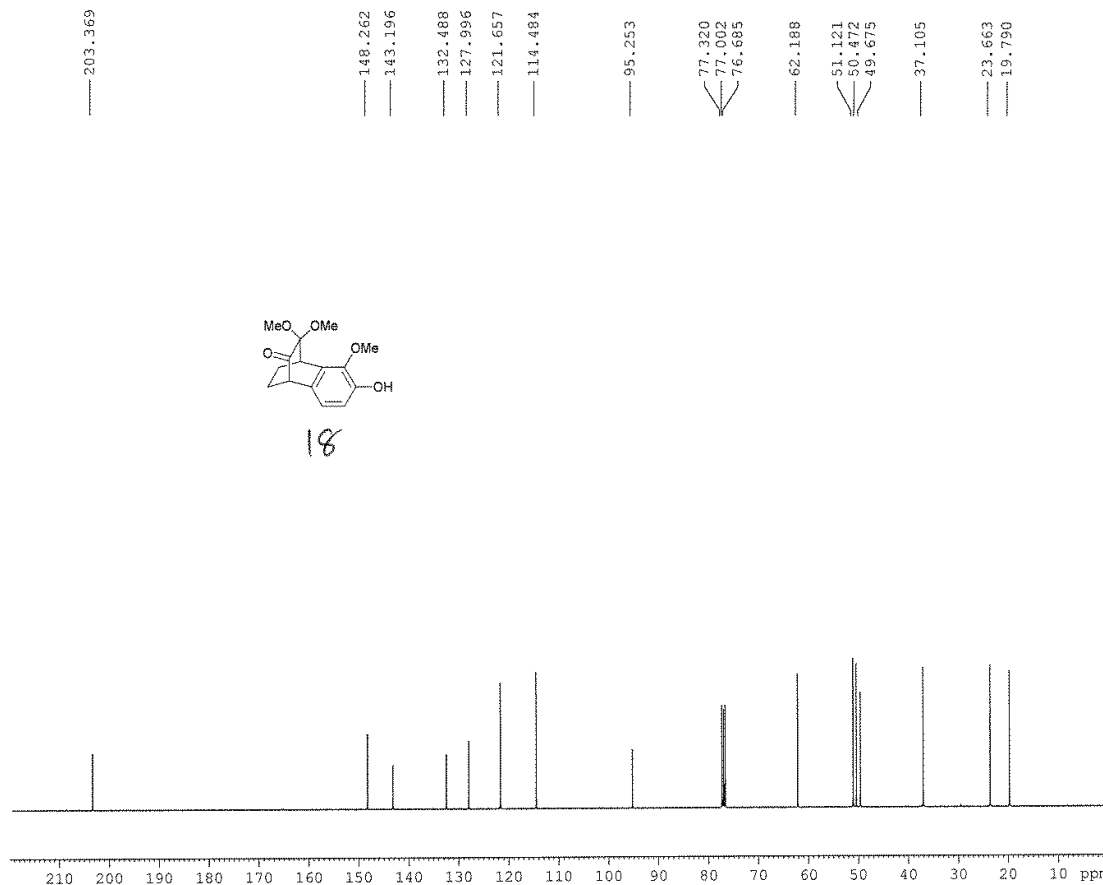

AMRI SRC  
location; 17

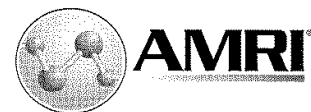

Name \_\_\_\_\_  
Date \_\_\_\_\_  
NB # \_\_\_\_\_

7.260  
7.157  
6.610  
6.604  
6.600  
6.597  
6.590  
5.799  
4.658  
4.651  
4.647  
4.638  
4.244  
4.235  
4.231  
4.225  
3.933  
3.396  
3.251

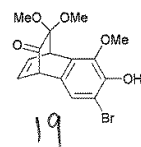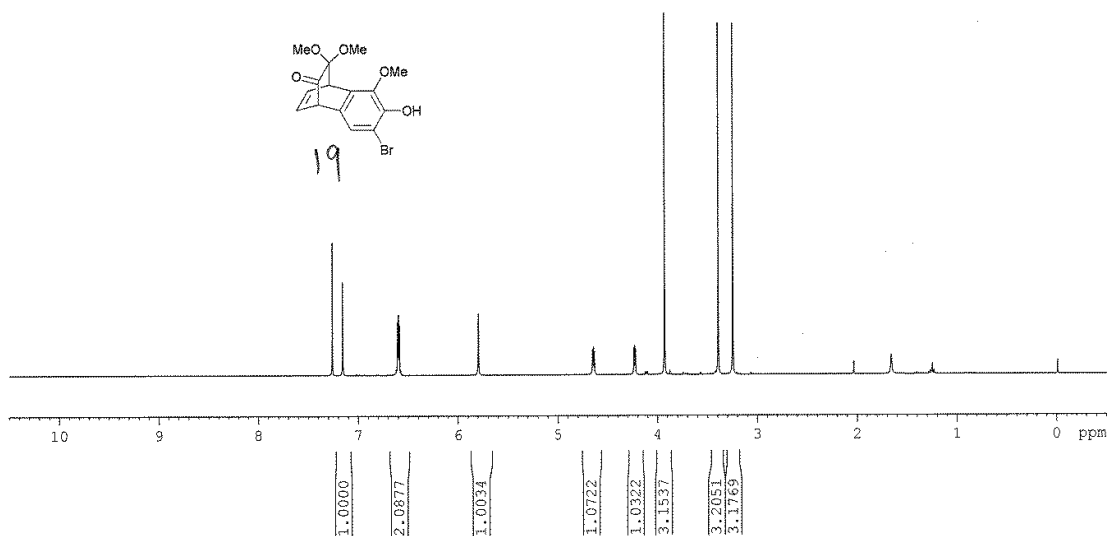

NAME SG-BCK-ArGD-NBS  
EXPNO 10  
PROCNO 1  
Date\_ 20140902  
Time 20.07  
INSTRUM spect  
PROBHD 5 mm PABBO BB-  
PULPROG zg30  
TD 65536  
SOLVENT CDCl3  
NS 16  
DS 2  
SWH 8012.820 Hz  
FIDRES 0.122266 Hz  
AQ 4.0894966 sec  
RG 71.8  
DW 62.400 usec  
DE 6.50 usec  
TE 300.0 K  
D1 1.00000000 sec  
TD0 1

===== CHANNEL f1 =====  
NUC1 1H  
P1 10.70 usec  
PL1 -3.00 dB  
PL1W 19.34582710 W  
SFO1 400.1318542 MHz  
SI 32768  
SF 400.1300093 MHz  
WDW EM  
SSB 0  
LB 0.30 Hz  
GB 0  
PC 1.00

# AMRI SRC location; 17

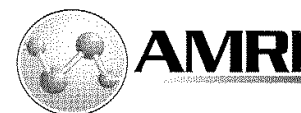

Name \_\_\_\_\_  
Date \_\_\_\_\_  
NB # \_\_\_\_\_

NAME SG-ECK-ArCO-NBS  
EXPNO 11  
PROCNO 1  
Date 20140902  
Time 23.02  
INSTRUM spect  
PROBHD 5 mm PABBO BBO  
PULPROG zgpg30  
TD 65536  
SOLVENT CDCl3  
NS 3000  
DS 4  
SWH 23980.814 Hz  
FIDRES 0.365918 Hz  
AQ 1.3664756 sec  
RG 19596.5  
DW 20.850 usec  
DE 6.50 usec  
TE 300.0 K  
D1 2.00000000 sec  
D11 0.03000000 sec  
TD0 1

----- CHANNEL f1 -----  
NUC1 13C  
P1 7.15 usec  
PL1 -4.00 dB  
PL1W 82.02445221 W  
SFO1 100.6228298 MHz

----- CHANNEL f2 -----  
CFDPRG2 waltz16  
NUC2 1H  
PCPD2 80.00 usec  
PL2 -3.00 dB  
PL12 14.47 dB  
PL13 15.06 dB  
PL2W 19.34582710 W  
PL12W 0.34640750 W  
PL13W 0.30240361 W  
SFO2 400.1316005 MHz  
SI 32768  
SF 100.6127725 MHz  
WDW EM  
SSB 0  
LB 1.00 Hz  
GB 0  
PC 1.40

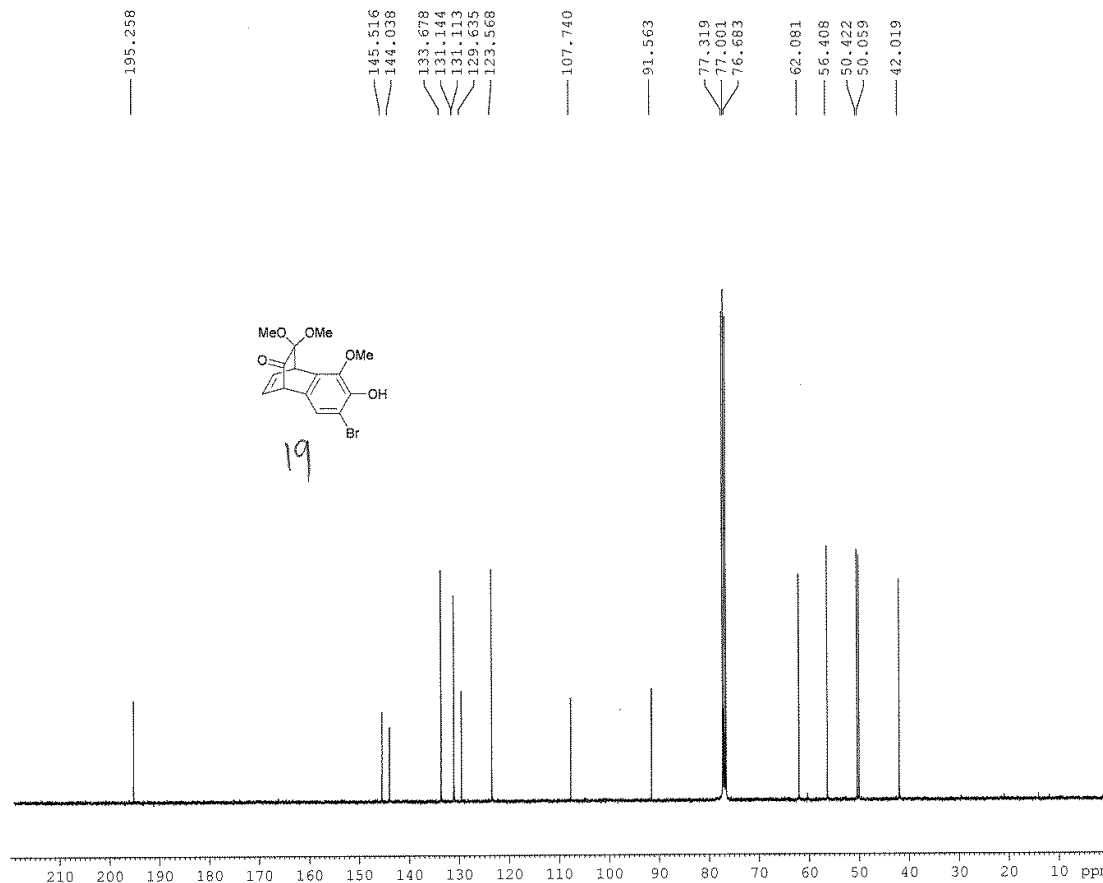

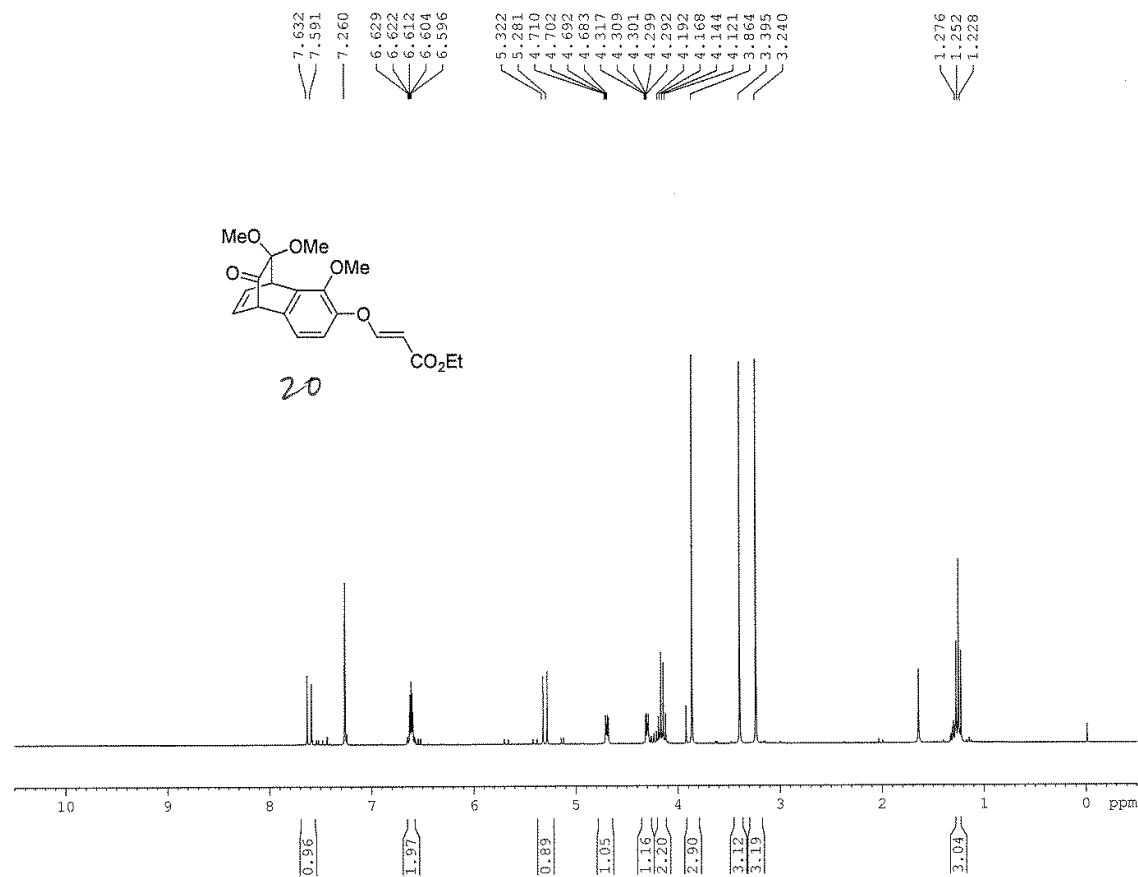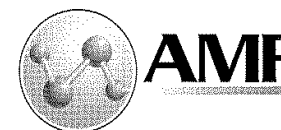

NAME SG-BCK-BrArgD-Ethylpropionate  
 EXPNO 10  
 PROCNO 1  
 Date 20140904  
 Time 1.33  
 INSTRUM spect  
 PROBHD 5 mm QNP 1H/13  
 PULPROG zg30  
 TD 32768  
 SOLVENT CDCl3  
 NS 16  
 DS 2  
 SWH 5995.204 Hz  
 FIDRES 0.182989 Hz  
 AQ 2.7329011 sec  
 RG 256  
 DW 83.400 usec  
 DE 6.00 usec  
 TE 300.0 K  
 DL 1.00000000 sec  
 MCREST 0.00300000 sec  
 MCRRK 0.01500000 sec

----- CHANNEL f1 -----  
 NUC1 1H  
 P1 12.20 usec  
 PL1 0.00 dB  
 SFO1 300.1319408 MHz  
 ST 16384  
 SF 300.1300563 MHz  
 WDW EM  
 SSB 0  
 LB 0.30 Hz  
 GB 0  
 PC 1.00

Name \_\_\_\_\_  
 Date \_\_\_\_\_  
 NB # \_\_\_\_\_

# AMRI; SRC location; 15

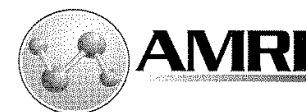

Name \_\_\_\_\_  
Date \_\_\_\_\_  
NB # \_\_\_\_\_

194.730  
166.793  
159.880  
148.830  
144.510  
136.051  
133.895  
132.394  
130.505  
124.336  
114.346  
101.122  
91.212  
77.420  
76.996  
76.573  
61.943  
60.118  
56.862  
50.441  
50.100  
41.879  
14.222

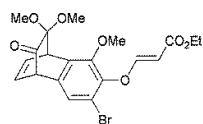

20

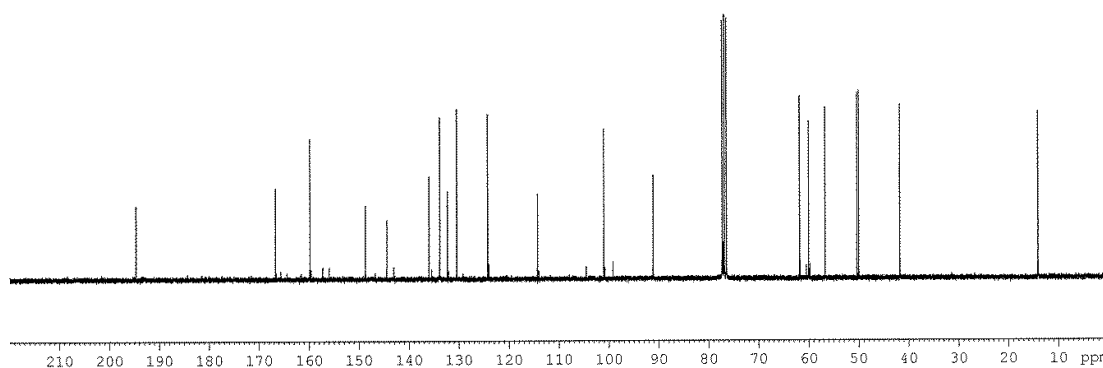

NAME SG-BCK-BrArGD-Ethylpropiolate  
EXNO 11  
PROCNO 1  
Date 20140904  
Time 3.31  
INSTRUM spect  
PROBHD 5 mm QNP 1H/13  
PULPROG zgpg30  
TD 65536  
SOLVENT CDCl3  
NS 3500  
DS 9  
SWH 22675.736 Hz  
FIDRES 0.346004 Hz  
AQ 1.4451188 sec  
RG 4597.6  
DW 22.050 usec  
DE 6.00 usec  
TE 300.0 K  
D1 0.50000000 sec  
d11 0.03000000 sec  
DELTA 0.40000001 sec  
MCREST 0.00000000 sec  
MCWRK 0.01500000 sec

===== CHANNEL f1 =====  
NUC1 13C  
P1 8.00 usec  
PL1 -2.00 dB  
SFO1 75.4767751 MHz

===== CHANNEL f2 =====  
CPDPRG2 waltz16  
NUC2 1H  
PCPD2 80.00 usec  
PL2 0.00 dB  
PL12 16.33 dB  
PL13 16.00 dB  
SFO2 300.1315007 MHz  
SI 131072  
SF 75.4677512 MHz  
WDW EM  
SSB 0  
LB 0.30 Hz  
GB 0  
FC 1.40

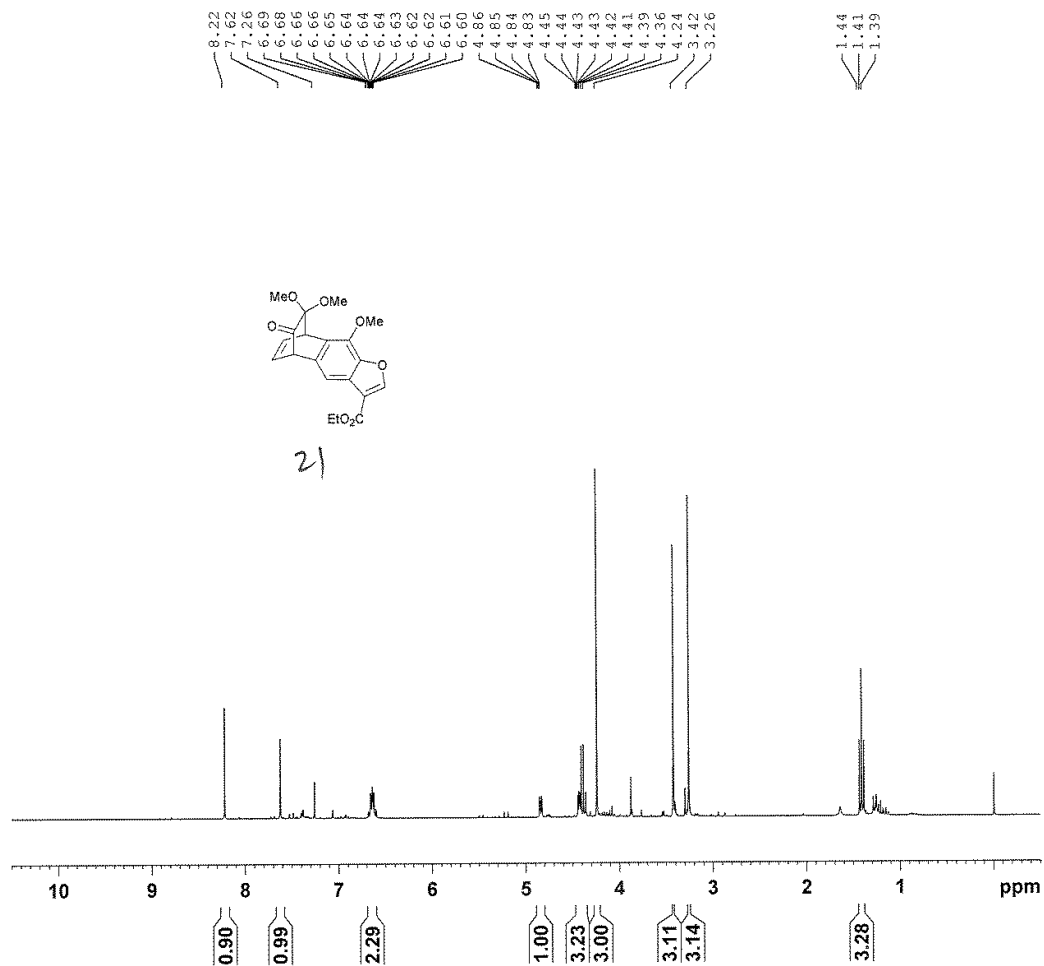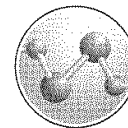

**AMRI**

NAME SG-BCK-F-ArGD-Furan- 1  
 EXPNO 10  
 PROCNO 1  
 Date\_ 20140905  
 Time 20.08  
 INSTRUM spect  
 PROBHD 5 mm QNP 1H/13  
 PULPROG zg30  
 TD 32768  
 SOLVENT CDCl3  
 NS 16  
 DS 2  
 SWH 5995.204 Hz  
 FIDRES 0.182959 Hz  
 AQ 2.7329011 sec  
 RG 181  
 DW 83.400 usec  
 DE 6.00 usec  
 TE 300.0 K  
 D1 1.00000000 sec  
 MCREST 0.00000000 sec  
 MCWRK 0.01500000 sec

===== CHANNEL f1 =====  
 NUC1 1H  
 P1 12.20 usec  
 PL1 0.00 dB  
 SFO1 300.1319508 MHz  
 SI 16384  
 SF 300.1300063 MHz  
 WDW EM  
 SSB 0  
 LB 0.30 Hz  
 GB 0  
 PC 1.00

Name \_\_\_\_\_

Date \_\_\_\_\_

NB # \_\_\_\_\_

AMRI; SRC  
location; 15

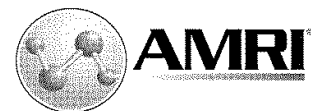

Name \_\_\_\_\_  
Date \_\_\_\_\_  
NB # \_\_\_\_\_

196.243  
163.091  
150.708  
145.928  
140.990  
134.596  
134.285  
130.675  
126.188  
125.553  
115.068  
111.899  
92.044  
77.424  
77.001  
76.577  
60.843  
60.654  
57.706  
50.526  
49.938  
41.360  
14.344

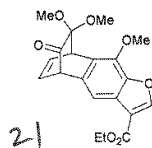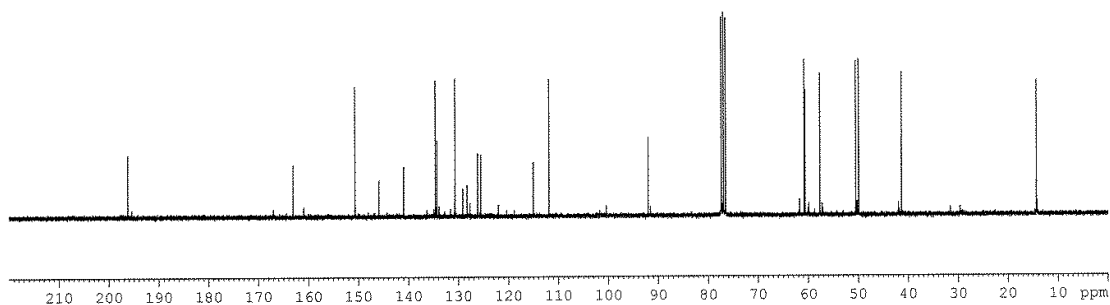

NAME SG-BCK-F-ArGD-Furan- 1  
EXPNO 11  
PROCNO 1  
Date\_ 20140905  
Time\_ 21.50  
INSTRUM spect  
PROBHD 5 mm QNP 1H/13  
PULPROG zgpg30  
TD 65536  
SOLVENT CDC13  
NS 3000  
DS 0  
SWH 22675.736 Hz  
FIDRES 0.346004 Hz  
AQ 1.4451188 sec  
RG 4096  
DW 22.050 usec  
DE 6.00 usec  
TE 300.0 K  
D1 0.50000000 sec  
d11 0.03000000 sec  
DELTA 0.40000001 sec  
MCREST 0.00000000 sec  
MCWRE 0.01500000 sec

===== CHANNEL f1 =====  
NUC1 13C  
P1 8.00 usec  
PL1 -2.00 dB  
SFO1 75.4767751 MHz

===== CHANNEL f2 =====  
CPDPRG2 waltz16  
NUC2 1H  
PCPD2 80.00 usec  
PL2 0.00 dB  
PL12 16.33 dB  
PL13 16.00 dB  
SFO2 300.1315007 MHz  
SI 131072  
SF 75.4677512 MHz  
WDW EM  
SSB 0  
LB 0.30 Hz  
GB 0  
PC 1.40

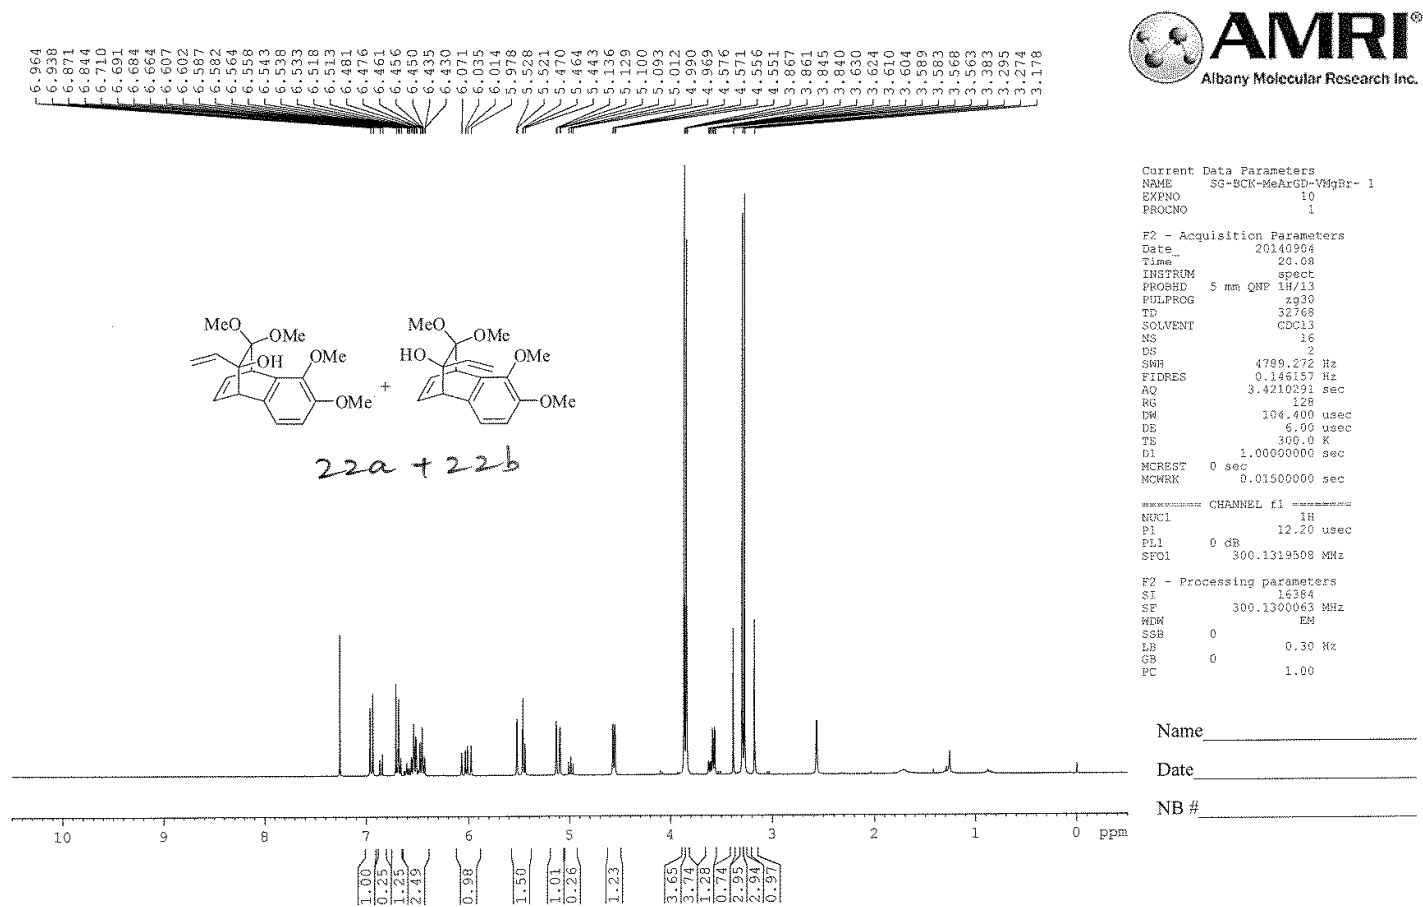

# AMRI; SRC location; 15

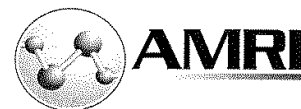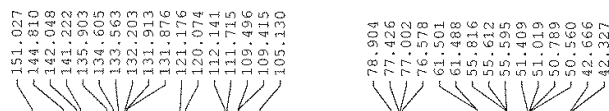

Name \_\_\_\_\_  
Date \_\_\_\_\_  
NB # \_\_\_\_\_

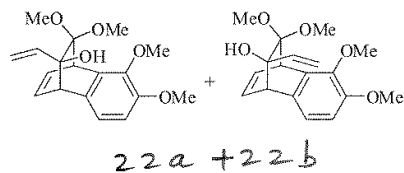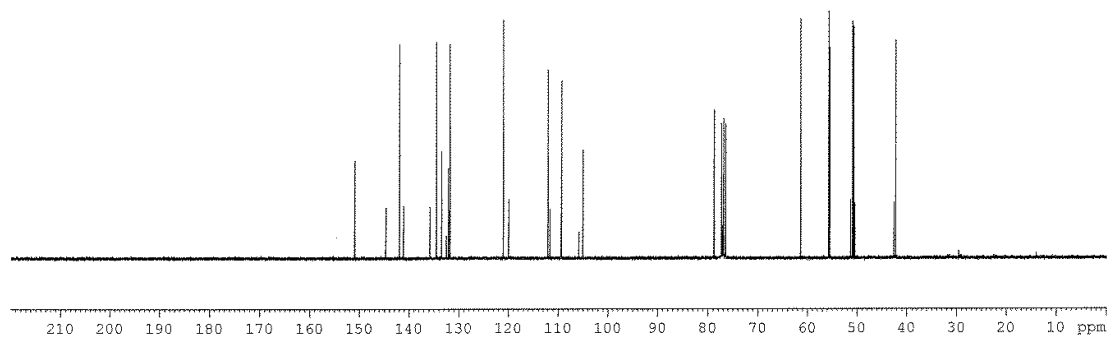

Current Data Parameters  
NAME SG-BCK-MeArgD-VMgBr- 1  
EXPNO 12  
PROCNO 1

F2 - Acquisition Parameters  
Date\_ 20140905  
Time 1.37  
INSTRUM spect  
PROBHD 5 mm QNP 1H/13  
PULPROG zgpg30  
TD 65536  
SOLVENT CDCl3  
NS 3000  
DS 0  
SWH 22675.736 Hz  
FIDRES 0.346004 Hz  
AQ 1.4451188 sec  
RG 4597.6  
DM 22.050 usec  
DE 6.00 usec  
TE 300.0 K  
D1 0.50000000 sec  
d11 0.03000000 sec  
DELTA 0.40000001 sec  
MCNST 0 sec  
MCWRK 0.01500000 sec

===== CHANNEL f1 =====  
NUC1 13C  
P1 8.00 usec  
PL1 -2.00 dB  
SFO1 75.4767751 MHz

===== CHANNEL f2 =====  
CPDPRG2 waltz16  
NUC2 1H  
PCPD2 80.00 usec  
PL12 0 dB  
PL13 16.33 dB  
PL14 16.00 dB  
SFO2 300.1315007 MHz

F2 - Processing parameters  
SI 131072  
SF 75.4677532 MHz  
WDW EM  
SSB 0  
LB 0.30 Hz  
GB 0  
PC 1.40
